# Supplementary material for: Deletion of the moeA gene in Flavobacterium IR1 drives structural color shift from green to blue and alters polysaccharide metabolism
Source: bioRxiv preprint, doi:10.1101/2025.01.13.632688, version 3 (2025-05-23)
Supplement: Sup Info Proteomics 1 [file 632688_file03.xlsx]

## Sheet: Simple
ID protein (GenBank)	Protein description 1	Protein description 2	p-value	IR1 WT	IR1 moeA	Fold change (moeA/WT)	log2(FC)	SecretomeP	SignalP	Pathway
PAM91427.1	histone	H1 [Flavobacterium sp. IR1]	0.764849	45.1067	36.6477	0.812467	-0.299619
PAM91430.1	hypothetical	protein B4N84_28400 [Flavobacterium sp. IR1]	8.47e-05	131.156	286.578	2.18502	1.12765	0.94	Other	X
PAM91438.1	FAD-binding	molybdopterin dehydrogenase [Flavobacterium sp. IR1]	2.56e-06	23.5036	3.02637	0.128762	-2.95722	0.22	Other
PAM91439.1	aldehyde	oxidase [Flavobacterium sp. IR1]	7.93e-12	808.907	13.7087	0.0169472	-5.88281	0.87	Other	Purine metabolism
PAM91479.1	hypothetical	protein B4N84_27920 [Flavobacterium sp. IR1]	1.22e-07	4422.43	15511.7	3.50752	1.81045	0.94	Yes (Signal peptide)	Proteolysis
PAM91480.1	hypothetical	protein B4N84_27925 [Flavobacterium sp. IR1]	0.00882313	22.446	17.8759	0.796397	-0.328441
PAM91481.1	peptidase	M42 [Flavobacterium sp. IR1]	0.68748	215.78	193.753	0.897919	-0.155342
PAM91487.1	hypothetical	protein B4N84_27960 [Flavobacterium sp. IR1]	9.6e-05	219.891	444.204	2.02011	1.01443	0.9	Yes (Signal peptide)	X
PAM91489.1	phosphoribosylaminoimidazolesuccinocarboxamide	synthase [Flavobacterium sp. IR1]	2.76e-05	1852.68	851.185	0.459435	-1.12207	0.06	Other
PAM91491.1	haloacid	dehalogenase [Flavobacterium sp. IR1]	0.642421	64.0966	54.22	0.845911	-0.241423
PAM91493.1	phosphate	starvation-inducible protein PhoH [Flavobacterium sp. IR1]	6.74e-08	21.4086	39.3703	1.83899	0.878914
PAM91498.1	DNA	polymerase III subunit beta [Flavobacterium sp. IR1]	1.46e-06	79.2165	36.3399	0.458742	-1.12425	0.46	Other
PAM91500.1	disulfide	bond formation protein DsbA [Flavobacterium sp. IR1]	0.00600045	22.8118	27.8995	1.22303	0.290458
PAM91506.1	hypothetical	protein B4N84_28060 [Flavobacterium sp. IR1]	2.08e-10	246.594	74.0628	0.300343	-1.73532	0.85	Yes (Signal peptide)	Transport
PAM91509.1	galactose-1-epimerase	[Flavobacterium sp. IR1]	1.72e-05	84.9378	146.527	1.72511	0.786687
PAM91510.1	L-arabinose	isomerase [Flavobacterium sp. IR1]	0.000788025	66.6286	19.4819	0.292395	-1.77401	0.07	Other
PAM91512.1	ribulokinase	[Flavobacterium sp. IR1]	0.622176	70.2905	51.4001	0.731252	-0.451559
PAM91517.1	serine	hydrolase [Flavobacterium sp. IR1]	0.0126394	52.6716	58.344	1.10769	0.147559
PAM91529.1	hypothetical	protein B4N84_27360, partial [Flavobacterium sp. IR1]	0.0288977	17.8869	16.6507	0.930889	-0.103319
PAM91530.1	secretion	protein [Flavobacterium sp. IR1]	2.14e-09	26868.6	78884.4	2.93593	1.55382	0.9	Yes (Signal peptide)	X
PAM91531.1	hypothetical	protein B4N84_27375 [Flavobacterium sp. IR1]	1.4e-06	345.418	579.735	1.67836	0.747051
PAM91532.1	TonB-dependent	receptor [Flavobacterium sp. IR1]	0.0286334	13.7835	36.0721	2.61705	1.38794
PAM91538.1	glycosidase	[Flavobacterium sp. IR1]	0.140886	39.6114	60.0675	1.51642	0.600668
PAM91540.1	sucrose-phosphate	phosphatase [Flavobacterium sp. IR1]	0.301326	35.8875	42.0213	1.17092	0.227639
PAM91542.1	hypothetical	protein B4N84_27430 [Flavobacterium sp. IR1]	0.112632	67.4642	54.1692	0.802932	-0.31665
PAM91544.1	DNA-binding	protein [Flavobacterium sp. IR1]	3.06e-06	101.625	237.867	2.34064	1.2269	0.13	Yes (Signal peptide)	X
PAM91550.1	multidrug	transporter [Flavobacterium sp. IR1]	1.72e-09	94.5617	246.204	2.60363	1.38052	0.88	Yes (Signal peptide)	Transport
PAM91552.1	hypothetical	protein B4N84_27485 [Flavobacterium sp. IR1]	0.137092	65.3163	123.984	1.89821	0.924637
PAM91567.1	thioredoxin	family protein [Flavobacterium sp. IR1]	0.128431	828.528	783.626	0.945804	-0.0803864
PAM91568.1	redoxin	[Flavobacterium sp. IR1]	0.0382721	45.5868	45.8712	1.00624	0.00897253
PAM91569.1	hypothetical	protein B4N84_27570 [Flavobacterium sp. IR1]	0.351924	25431.6	24541	0.96498	-0.0514293
PAM91578.1	MarR	family transcriptional regulator [Flavobacterium sp. IR1]	0.00162709	87.1861	101.609	1.16542	0.220855
PAM91579.1	GNAT	family N-acetyltransferase [Flavobacterium sp. IR1]	1.05e-06	63.4598	264.741	4.1718	2.06067	0.03	Other
PAM91586.1	acetyl-CoA	acetyltransferase [Flavobacterium sp. IR1]	1.13e-06	39.024	15.6191	0.400243	-1.32105	0.12	Other
PAM91608.1	histidine	kinase [Flavobacterium sp. IR1]	0.00170457	76.7843	54.5749	0.710756	-0.492573
PAM91613.1	PAS	domain-containing sensor histidine kinase [Flavobacterium sp. IR1]	0.00121615	64.4667	36.3847	0.564395	-0.825222
PAM91614.1	response	regulator [Flavobacterium sp. IR1]	4.12e-05	12.7276	20.9688	1.64751	0.720286
PAM91618.1	hypothetical	protein B4N84_27840 [Flavobacterium sp. IR1]	0.0748695	31.347	34.5024	1.10066	0.138372
PAM91622.1	cell	surface protein [Flavobacterium sp. IR1]	1.49e-08	5575.26	11850.2	2.1255	1.0878	0.93	Yes (Lipoprotein signal peptide)	X
PAM91633.1	hypothetical	protein B4N84_26820 [Flavobacterium sp. IR1]	0.593326	4666.77	4639.67	0.994192	-0.00840371
PAM91635.1	YhcH/YjgK/YiaL	family protein [Flavobacterium sp. IR1]	0.000246388	48.5846	75.2636	1.54912	0.631453
PAM91636.1	DUF4861	domain-containing protein [Flavobacterium sp. IR1]	0.000395602	853.427	1017.18	1.19187	0.253229
PAM91641.1	glycoside	hydrolase [Flavobacterium sp. IR1]	1.45e-06	27.2155	64.6182	2.37432	1.24751	0.94	Other
PAM91645.1	hypothetical	protein B4N84_26890 [Flavobacterium sp. IR1]	0.00297989	285.163	161.75	0.567221	-0.818018
PAM91646.1	RagB/SusD	family nutrient uptake outer membrane protein [Flavobacterium sp. IR1]	6.89e-08	168.506	77.9063	0.462337	-1.11298	0.68	Yes (Lipoprotein signal peptide)	Carbohydrate metabolism
PAM91647.1	SusC/RagA	family TonB-linked outer membrane protein [Flavobacterium sp. IR1]	0.00794825	75.8135	56.3846	0.743727	-0.427154
PAM91652.1	TonB-dependent	siderophore receptor [Flavobacterium sp. IR1]	0.104328	240.273	96.0931	0.399934	-1.32217
PAM91655.1	TonB-dependent	siderophore receptor [Flavobacterium sp. IR1]	0.392108	113.239	94.3289	0.833007	-0.2636
PAM91660.1	hypothetical	protein B4N84_26970 [Flavobacterium sp. IR1]	0.558959	436.251	422.367	0.968175	-0.0466609
PAM91661.1	D-methionine	ABC transporter, ATP-binding protein [Flavobacterium sp. IR1]	0.576764	46.8166	34.1476	0.729391	-0.455235
PAM91663.1	methionine	ABC transporter substrate-binding protein MetQ [Flavobacterium sp. IR1]	1.86e-05	181.905	240.447	1.32183	0.402536
PAM91671.1	hypothetical	protein B4N84_27030 [Flavobacterium sp. IR1]	0.154116	3.1361	4.30699	1.37336	0.457708
PAM91672.1	glycosylasparaginase	[Flavobacterium sp. IR1]	0.000182109	345.176	372.915	1.08036	0.111516
PAM91673.1	beta-galactosidase	[Flavobacterium sp. IR1]	0.71379	4.78789	3.66584	0.765648	-0.385247
PAM91674.1	beta-N-acetylhexosaminidase	[Flavobacterium sp. IR1]	0.000344094	418.095	451.835	1.0807	0.111966
PAM91675.1	alpha-L-fucosidase	[Flavobacterium sp. IR1]	0.00474002	400.12	441.356	1.10306	0.141508
PAM91677.1	glycoside	hydrolase family 3 [Flavobacterium sp. IR1]	0.936156	414.294	397.937	0.960519	-0.0581136
PAM91678.1	SusC/RagA	family TonB-linked outer membrane protein [Flavobacterium sp. IR1]	2.05e-07	675.959	1081.87	1.6005	0.678524
PAM91679.1	SusD/RagB	family nutrient-binding outer membrane lipoprotein [Flavobacterium sp. IR1]	0.00137368	17.3993	8.83609	0.507841	-0.97755
PAM91686.1	hypothetical	protein B4N84_27110 [Flavobacterium sp. IR1]	8.87e-08	1012.03	311.349	0.307649	-1.70064	0.94	Yes (Lipoprotein signal peptide)	X
PAM91687.1	hypothetical	protein B4N84_27115 [Flavobacterium sp. IR1]	0.0255858	28.1584	30.9258	1.09828	0.135244
PAM91688.1	flagellin	biosynthesis protein FlgD [Flavobacterium sp. IR1]	2.17e-05	2107.45	79.8785	0.037903	-4.72155	0.81	Yes (Signal peptide)	Motility
PAM91690.1	hypothetical	protein B4N84_27135 [Flavobacterium sp. IR1]	3.09e-05	14.1493	27.1299	1.91741	0.939158
PAM91691.1	hypothetical	protein B4N84_27140 [Flavobacterium sp. IR1]	1.62e-05	23.2795	61.2947	2.63299	1.3967	0.93	Yes (Signal peptide)	Transport
PAM91696.1	hypothetical	protein B4N84_27165 [Flavobacterium sp. IR1]	0.0199214	368.791	282.829	0.766907	-0.382877
PAM91698.1	hypothetical	protein B4N84_27180 [Flavobacterium sp. IR1]	0.48515	109.467	96.6262	0.882696	-0.180011
PAM91700.1	glucose	dehydrogenase [Flavobacterium sp. IR1]	2.16e-07	9115.4	13436.6	1.47405	0.559789
PAM91708.1	alpha-xylosidase	[Flavobacterium sp. IR1]	0.906834	40.7159	32.3649	0.794895	-0.331164
PAM91710.1	NADPH-dependent	butanol dehydrogenase [Flavobacterium sp. IR1]	0.151914	202.696	139.08	0.68615	-0.543404
PAM91712.1	xylose	isomerase [Flavobacterium sp. IR1]	0.0190624	18.5305	10.7526	0.580263	-0.785222
PAM91723.1	hypothetical	protein B4N84_27320, partial [Flavobacterium sp. IR1]	0.104401	18.3124	112.861	6.16308	2.62365
PAM91724.1	carbohydrate-binding	protein [Flavobacterium sp. IR1]	0.00249276	11.3158	27.9878	2.47333	1.30646	0.94	Yes (Signal peptide)	Carbohydrate metabolism
PAM91725.1	hypothetical	protein B4N84_26875 [Flavobacterium sp. IR1]	0.00318548	7.21997	30.1739	4.17922	2.06324	0.95	Other	Carbohydrate metabolism
PAM91728.1	thiamine	biosynthesis protein ApbE [Flavobacterium sp. IR1]	0.00445517	25.3889	12.3306	0.485667	-1.04196	0.45	Other
PAM91744.1	hypothetical	protein B4N84_23220 [Flavobacterium sp. IR1]	1.83e-05	389.725	273.896	0.702792	-0.508829
PAM91753.1	gliding	motility protein GldN [Flavobacterium sp. IR1]	0.000502975	35094.4	46792.2	1.33332	0.415027
PAM91754.1	gliding	motility protein GldM [Flavobacterium sp. IR1]	0.000162133	555.508	909.418	1.63709	0.711137
PAM91755.1	gliding	motility protein GldL [Flavobacterium sp. IR1]	1.59e-07	1243.51	267.586	0.215187	-2.21634	0.79	Other	Motility
PAM91756.1	gliding	motility lipoprotein GldK [Flavobacterium sp. IR1]	0.0352002	30693.8	36175.7	1.1786	0.237071
PAM91757.1	arginase	[Flavobacterium sp. IR1]	0.0392509	63.3526	32.0684	0.50619	-0.982249
PAM91758.1	DNA	topoisomerase I [Flavobacterium sp. IR1]	0.0030411	32.9417	27.7008	0.840903	-0.249989
PAM91760.1	sigma-54-dependent	Fis family transcriptional regulator [Flavobacterium sp. IR1]	0.00160064	21.1687	26.984	1.27471	0.350174
PAM91761.1	hypothetical	protein B4N84_23305 [Flavobacterium sp. IR1]	0.0011832	82.553	57.8759	0.701076	-0.512357
PAM91764.1	four	helix bundle protein [Flavobacterium sp. IR1]	0.0365482	43.4699	26.3093	0.60523	-0.724445
PAM91765.1	chaperonin	GroEL [Flavobacterium sp. IR1]	2.64e-08	821.696	315.802	0.384329	-1.37959	0.09	Other
PAM91766.1	alkaline	phosphatase family protein [Flavobacterium sp. IR1]	3.52e-05	340.415	142.423	0.418382	-1.25711	0.88	Yes (Signal peptide)	Lipid metabolism
PAM91774.1	hypothetical	protein B4N84_23380 [Flavobacterium sp. IR1]	0.000129639	18.1932	73.3011	4.02903	2.01043	0.13	Other
PAM91786.1	hypothetical	protein B4N84_23440 [Flavobacterium sp. IR1]	6.3e-07	306.288	439.207	1.43397	0.520012
PAM91787.1	serine	hydrolase [Flavobacterium sp. IR1]	1.24e-07	86.337	26.4635	0.306515	-1.70597	0.48	Yes (Signal peptide)	Antiotic resistance/Beta-lactam resistance/Signal transduction
PAM91788.1	hypothetical	protein B4N84_23450 [Flavobacterium sp. IR1]	0.000168187	3.23277	5.78982	1.79098	0.840748
PAM91793.1	aminoglycoside	phosphotransferase [Flavobacterium sp. IR1]	0.0127841	39.406	20.905	0.530505	-0.914562
PAM91802.1	glutamyl-tRNA	amidotransferase [Flavobacterium sp. IR1]	2.16e-06	95.0835	23.3563	0.245639	-2.02539	0.07	Other
PAM91804.1	cell	division protein FtsA [Flavobacterium sp. IR1]	3.04e-07	69.8001	26.9689	0.386373	-1.37193	0.08	Other
PAM91806.1	UDP-N-acetylmuramate--L-alanine	ligase [Flavobacterium sp. IR1]	1.51e-06	74.2665	117.864	1.58704	0.666343
PAM91807.1	undecaprenyldiphospho-muramoylpentapeptide	beta-N-acetylglucosaminyltransferase [Flavobacterium sp. IR1]	6.39e-07	21.9367	90.7544	4.1371	2.04862	0.12	Other
PAM91810.1	UDP-N-acetylmuramoyl-L-alanine--D-glutamate	ligase [Flavobacterium sp. IR1]	0.0652196	51.7365	61.3751	1.1863	0.246472
PAM91812.1	UDP-N-acetylmuramoyl-L-alanyl-D-glutamate--2,6-diaminopimelate	ligase [Flavobacterium sp. IR1]	7.63e-09	667.403	235.021	0.352142	-1.50577	0.06	Other
PAM91815.1	division/cell	wall cluster transcriptional repressor MraZ [Flavobacterium sp. IR1]	0.0847117	113.288	135.442	1.19556	0.257681
PAM91816.1	alpha/beta	hydrolase [Flavobacterium sp. IR1]	8.22e-07	33.2228	91.6242	2.75787	1.46356	0.23	Other
PAM91818.1	gliding	motility protein GldC [Flavobacterium sp. IR1]	0.43686	63.769	55.3335	0.867717	-0.204704
PAM91820.1	NAD(+)	synthase [Flavobacterium sp. IR1]	0.00138645	542.567	548.905	1.01168	0.016756
PAM91821.1	DNA-binding	response regulator [Flavobacterium sp. IR1]	0.00525131	41.8664	46.5696	1.11234	0.153598
PAM91823.1	hypothetical	protein B4N84_23635 [Flavobacterium sp. IR1]	0.210891	37.4201	44.1604	1.18012	0.238939
PAM91826.1	polyprenyl	synthetase [Flavobacterium sp. IR1]	0.125661	28.4591	22.7101	0.797991	-0.325556
PAM91829.1	hypothetical	protein B4N84_23665 [Flavobacterium sp. IR1]	0.0277975	199.948	269.418	1.34744	0.430218
PAM91830.1	hypothetical	protein B4N84_23670 [Flavobacterium sp. IR1]	0.000389297	256.282	334.289	1.30438	0.383361
PAM91832.1	methyltransferase	[Flavobacterium sp. IR1]	0.000679969	25.0503	81.4085	3.2498	1.70035	0.19	Other
PAM91835.1	aminopeptidase	[Flavobacterium sp. IR1]	2.34e-08	2513.17	1421.91	0.565783	-0.821679
PAM91836.1	hypothetical	protein B4N84_23705 [Flavobacterium sp. IR1]	0.0171254	23.9365	33.3756	1.39434	0.47958
PAM91837.1	hypothetical	protein B4N84_23710 [Flavobacterium sp. IR1]	2.4e-05	135.932	70.12	0.515847	-0.954985
PAM91839.1	dipeptidase	E [Flavobacterium sp. IR1]	0.002151	154.422	66.6036	0.43131	-1.2132	0.21	Other
PAM91846.1	phosphoglycerate	mutase (2,3-diphosphoglycerate-independent) [Flavobacterium sp. IR1]	0.000376666	388.08	206.493	0.532088	-0.910263
PAM91847.1	DUF445	domain-containing protein [Flavobacterium sp. IR1]	0.00165021	12.1193	22.0506	1.81946	0.863512
PAM91850.1	DUF5103	domain-containing protein [Flavobacterium sp. IR1]	0.000494115	231.667	123.893	0.53479	-0.902955
PAM91856.1	1-pyrroline-5-carboxylate	dehydrogenase [Flavobacterium sp. IR1]	2.69e-07	8425.07	5030.93	0.597138	-0.743864
PAM91861.1	alkaline	phosphatase [Flavobacterium sp. IR1]	5.02e-05	1874.59	1014.85	0.541374	-0.885302
PAM91862.1	16S	rRNA (guanine(527)-N(7))-methyltransferase RsmG [Flavobacterium sp. IR1]	0.119675	72.2427	169.66	2.34847	1.23172
PAM91864.1	aspartate	aminotransferase [Flavobacterium sp. IR1]	0.00122362	347.235	184.017	0.529951	-0.916068
PAM91870.1	phosphoribosylglycinamide	formyltransferase 2 [Flavobacterium sp. IR1]	0.0536252	33.6066	30.4204	0.905193	-0.143703
PAM91871.1	hypothetical	protein B4N84_23905 [Flavobacterium sp. IR1]	0.187924	19.1895	21.6527	1.12836	0.174228
PAM91873.1	isocitrate	lyase [Flavobacterium sp. IR1]	8.96e-05	1584.27	1082.52	0.683291	-0.549428
PAM91874.1	malate	synthase A [Flavobacterium sp. IR1]	0.429763	425.297	458.333	1.07768	0.107927
PAM91879.1	[acyl-carrier-protein]	S-malonyltransferase [Flavobacterium sp. IR1]	0.000335699	498.131	197.432	0.396347	-1.33517	0.11	Other
PAM91880.1	UDP-glucose	4-epimerase GalE [Flavobacterium sp. IR1]	0.595282	18.6168	25.653	1.37795	0.462522
PAM91881.1	DUF4440	domain-containing protein [Flavobacterium sp. IR1]	0.133318	187.304	121.128	0.646691	-0.628851
PAM91882.1	transcriptional	regulator [Flavobacterium sp. IR1]	0.00720041	307.657	184.782	0.600612	-0.735495
PAM91886.1	hypothetical	protein B4N84_24000 [Flavobacterium sp. IR1]	0.00284577	1504.94	606.47	0.402986	-1.3112	0.93	Yes (Signal peptide)	X
PAM91889.1	signal	peptide peptidase SppA [Flavobacterium sp. IR1]	0.0336974	49.1885	33.6933	0.684983	-0.545859
PAM91890.1	AsmA	family protein [Flavobacterium sp. IR1]	0.0178985	41.9051	56.3693	1.34516	0.427782
PAM91893.1	phosphoserine	phosphatase SerB [Flavobacterium sp. IR1]	0.281657	20.8096	27.5504	1.32393	0.404826
PAM91894.1	VOC	family protein [Flavobacterium sp. IR1]	0.562416	301.591	262.871	0.871617	-0.198234
PAM91895.1	ATPase	[Flavobacterium sp. IR1]	0.0610579	712.33	653.707	0.917702	-0.123902
PAM91897.1	ATP-dependent	Clp protease ATP-binding subunit ClpX [Flavobacterium sp. IR1]	0.0367011	58.4819	61.6246	1.05374	0.0755168
PAM91898.1;WP_035685605.1	ATP-dependent;MULTISPECIES:	Clp protease proteolytic subunit [Flavobacterium sp. IR1];ATP-dependent Clp endopeptidase proteolytic subunit ClpP [Flavobacterium]	0.000430522	746.215	578.441	0.775167	-0.367421
PAM91899.1	trigger	factor [Flavobacterium sp. IR1]	5.98e-05	104.149	171.701	1.64861	0.721248
PAM91901.1	alpha/beta	hydrolase [Flavobacterium sp. IR1]	1.69e-06	414.927	105.613	0.254533	-1.97407	0.06	Other
PAM91902.1	hypothetical	protein B4N84_24085 [Flavobacterium sp. IR1]	0.000415887	895.056	665.799	0.743863	-0.426892
PAM91903.1	hypothetical	protein B4N84_24090 [Flavobacterium sp. IR1]	0.05559	34.0138	49.9857	1.46957	0.555394
PAM91905.1	pyridoxine	5'-phosphate synthase [Flavobacterium sp. IR1]	0.553087	9.34496	7.93166	0.848763	-0.236566
PAM91906.1	acetoin	utilization protein acuB [Flavobacterium sp. IR1]	0.000624516	244.848	321.13	1.31154	0.391267
PAM91907.1	NAD	kinase [Flavobacterium sp. IR1]	0.0118902	317.808	209.229	0.65835	-0.603073
PAM91908.1	hypothetical	protein B4N84_24115 [Flavobacterium sp. IR1]	5.93e-08	90.6224	233.438	2.57594	1.3651	0.67	Yes (Signal peptide)	X
PAM91909.1	outer	membrane protein assembly factor BamA [Flavobacterium sp. IR1]	0.00288728	513.991	388.71	0.756257	-0.403051
PAM91910.1	hypothetical	protein B4N84_24130 [Flavobacterium sp. IR1]	1.59e-05	1225.84	738.054	0.602079	-0.731974
PAM91916.1	galactose	oxidase [Flavobacterium sp. IR1]	3.79e-07	133.382	47.7467	0.357971	-1.48209	0.94	Yes (Lipoprotein signal peptide)	Carbohydrate metabolism
PAM91920.1	gamma	carbonic anhydrase family protein [Flavobacterium sp. IR1]	0.0171124	52.3476	68.5706	1.30991	0.389466
PAM91921.1	hypothetical	protein B4N84_24195 [Flavobacterium sp. IR1]	1.15e-05	163.668	326.995	1.99792	0.9985
PAM91922.1	hypothetical	protein B4N84_24200 [Flavobacterium sp. IR1]	1.44e-05	109.779	60.7396	0.553288	-0.853897
PAM91926.1	efflux	transporter periplasmic adaptor subunit [Flavobacterium sp. IR1]	4.32e-05	7.68607	10.084	1.31199	0.391754
PAM91927.1	transporter	[Flavobacterium sp. IR1]	0.0022527	35.8363	22.2206	0.62006	-0.68952
PAM91938.1	cytochrome	oxidase subunit III [Flavobacterium sp. IR1]	0.00128857	193.307	81.776	0.423037	-1.24114	0.12	Other
PAM91941.1	deoxyribose-phosphate	aldolase [Flavobacterium sp. IR1]	0.225045	42.7036	24.2209	0.567185	-0.818109
PAM91943.1;WP_056188370.1	glycine;MULTISPECIES:	cleavage system protein H [Flavobacterium sp. IR1];glycine cleavage system protein GcvH [Flavobacterium]	2.05e-05	651.725	45.5113	0.069832	-3.83997	0.14	Other
PAM91944.1	cell	surface protein SprA [Flavobacterium sp. IR1]	2.3e-07	274.794	432.266	1.57306	0.65357
PAM91946.1	NADP-dependent	malic enzyme [Flavobacterium sp. IR1]	0.0269372	319.134	215.931	0.676616	-0.56359
PAM91952.1	hypothetical	protein B4N84_24355 [Flavobacterium sp. IR1]	0.218567	7.61408	6.71657	0.882125	-0.180944
PAM91954.1	Holliday	junction branch migration DNA helicase RuvB [Flavobacterium sp. IR1]	9.88e-07	22.0262	53.8598	2.44526	1.28999	0.08	Other
PAM91956.1	cytochrome	C oxidase subunit II [Flavobacterium sp. IR1]	0.0548701	90.9888	74.3735	0.817392	-0.290901
PAM91957.1	quinol:cytochrome	C oxidoreductase [Flavobacterium sp. IR1]	0.0406203	121.796	89.0652	0.731268	-0.451528
PAM91958.1	cytochrome	C [Flavobacterium sp. IR1]	0.0266162	980.369	710.24	0.724461	-0.465019
PAM91960.1;WP_089048078.1	hydrogenase;MULTISPECIES:	[Flavobacterium sp. IR1];polysulfide reductase NrfD [Flavobacterium]	0.0015854	143.139	94.4529	0.659867	-0.599753
PAM91961.1	quinol:cytochrome	C oxidoreductase [Flavobacterium sp. IR1]	0.330497	193.833	207.436	1.07017	0.0978459
PAM91962.1	cytochrome	C [Flavobacterium sp. IR1]	7.01e-06	156.789	71.6889	0.457232	-1.129	0.86	Yes (Signal peptide)	Electron transport
PAM91963.1	sporulation	protein [Flavobacterium sp. IR1]	0.000201634	48.5707	21.0531	0.433452	-1.20605	0.54	Yes (Signal peptide)	X
PAM91964.1	translation	initiation factor IF-2 [Flavobacterium sp. IR1]	2.12e-07	460.247	182.179	0.395828	-1.33705	0.12	Other
PAM91965.1	transcription	termination/antitermination protein NusA [Flavobacterium sp. IR1]	0.00077163	38.4825	69.846	1.815	0.859973
PAM91968.1	hypothetical	protein B4N84_24445 [Flavobacterium sp. IR1]	1.68e-06	164.523	16.5045	0.100317	-3.31736	0.24	Other
PAM91970.1	thiol	reductase thioredoxin [Flavobacterium sp. IR1]	0.0503961	39.8781	24.7149	0.619763	-0.690212
PAM91972.1	DNA	polymerase I [Flavobacterium sp. IR1]	0.00256253	8.20343	11.7271	1.42953	0.515543
PAM91974.1	hypothetical	protein B4N84_24475 [Flavobacterium sp. IR1]	0.00207516	120.348	421.774	3.50461	1.80925	0.83	Yes (TAT Lipoprotein signal peptide)	Iron acquisition
PAM91975.1	hypothetical	protein B4N84_24480 [Flavobacterium sp. IR1]	8.61e-06	740.73	182.527	0.246415	-2.02084	0.33	Other
PAM91976.1;WP_026983738.1	50S;MULTISPECIES:	ribosomal protein L13 [Flavobacterium sp. IR1];50S ribosomal protein L13 [Flavobacterium]	5.47e-06	82.6219	21.4444	0.259549	-1.94592	0.93	Other	X
PAM91977.1;WP_007808909.1	30S;MULTISPECIES:	ribosomal protein S9 [Flavobacterium sp. IR1];30S ribosomal protein S9 [Flavobacterium]	0.00409586	13.4869	25.8256	1.91486	0.937238
PAM91978.1	30S	ribosomal protein S2 [Flavobacterium sp. IR1]	8.26e-07	13885.2	17708.3	1.27534	0.350881
PAM91979.1	translation	elongation factor Ts [Flavobacterium sp. IR1]	1.42e-06	502.553	155.053	0.30853	-1.69652	0.07	Other
PAM91980.1	peptidase	M3 [Flavobacterium sp. IR1]	0.0304111	265.87	283.606	1.06671	0.0931675
PAM91983.1	hypothetical	protein B4N84_24520 [Flavobacterium sp. IR1]	6.08e-06	1695.13	2580.48	1.52229	0.606248
PAM91995.1;WP_017497965.1	DUF3127;MULTISPECIES:	domain-containing protein [Flavobacterium sp. IR1];DUF3127 domain-containing protein [Flavobacterium]	0.816715	92.2599	96.9782	1.05114	0.0719556
PAM91996.1	flavin	reductase [Flavobacterium sp. IR1]	0.159279	27.0803	17.4394	0.64399	-0.63489
PAM91999.1	transcription	elongation factor GreA [Flavobacterium sp. IR1]	0.000572149	102.024	44.5867	0.43702	-1.19423	0.49	Other
PAM92000.1	hypothetical	protein B4N84_24605 [Flavobacterium sp. IR1]	0.000370333	3411.3	734.324	0.215262	-2.21583	0.77	Yes (Lipoprotein signal peptide)	X
PAM92001.1	TonB-dependent	receptor [Flavobacterium sp. IR1]	0.276347	20.5949	21.9348	1.06506	0.0909334
PAM92003.1	ATPase	[Flavobacterium sp. IR1]	0.025823	34.7052	24.6	0.708826	-0.496496
PAM92009.1	4-phosphopantetheinyl	transferase [Flavobacterium sp. IR1]	0.0122143	41.9695	56.7374	1.35187	0.434961
PAM92010.1	adenosylhomocysteinase	[Flavobacterium sp. IR1]	0.0092442	540.356	360.836	0.667774	-0.582567
PAM92015.1	NUDIX	hydrolase [Flavobacterium sp. IR1]	0.00442443	12.4556	11.4482	0.919121	-0.121673
PAM92017.1	hypothetical	protein B4N84_24695 [Flavobacterium sp. IR1]	0.0271807	225.376	171.283	0.75999	-0.395948
PAM92018.1	glycosyl	hydrolase [Flavobacterium sp. IR1]	0.00348276	181.955	221.954	1.21983	0.286678
PAM92019.1	endonuclease/exonuclease/phosphatase	[Flavobacterium sp. IR1]	0.000130548	109.216	66.392	0.607897	-0.718101
PAM92020.1	glycosyl	hydrolase family 5 [Flavobacterium sp. IR1]	2.01e-06	27.5807	63.4381	2.30009	1.20169	0.74	Yes (Signal peptide)	Carbohydrate metabolism
PAM92021.1	beta-glucosidase	[Flavobacterium sp. IR1]	0.0107404	147.417	163.67	1.11026	0.150892
PAM92024.1	RagB/SusD	family nutrient uptake outer membrane protein [Flavobacterium sp. IR1]	0.00404815	1063.92	805.619	0.757216	-0.401222
PAM92025.1	SusC/RagA	family TonB-linked outer membrane protein [Flavobacterium sp. IR1]	1.08e-08	545.718	913.967	1.6748	0.743988
PAM92027.1	UDP-N-acetylmuramoyl-tripeptide--D-alanyl-D-alanine	ligase [Flavobacterium sp. IR1]	0.456672	108.492	89.6663	0.826477	-0.274953
PAM92028.1	gliding	motility lipoprotein GldJ [Flavobacterium sp. IR1]	0.00903206	79705.9	63058	0.791133	-0.338008
PAM92029.1	peptidase	C25 [Flavobacterium sp. IR1]	1.29e-10	1291.48	2872	2.22381	1.15303	0.8	Yes (Signal peptide)	Proteolysis/Nucleotide metabolism (pyrimidine)/Drug metabolism
PAM92030.1	hypothetical	protein B4N84_24760 [Flavobacterium sp. IR1]	1.95e-07	1865.05	3390.45	1.81789	0.862266
PAM92031.1	cytidine	deaminase [Flavobacterium sp. IR1]	5.49e-09	134.18	279.764	2.08499	1.06004	0.48	Other
PAM92032.1	pyruvate	dehydrogenase (acetyl-transferring) E1 component subunit alpha [Flavobacterium sp. IR1]	5.99e-05	404.492	207.771	0.513658	-0.96112
PAM92033.1	pyruvate	dehydrogenase [Flavobacterium sp. IR1]	0.0076182	228.897	140.259	0.612758	-0.70661
PAM92034.1	aminopeptidase	[Flavobacterium sp. IR1]	9.24e-08	67.3984	107.111	1.58922	0.668321
PAM92039.1	hypothetical	protein B4N84_24805 [Flavobacterium sp. IR1]	0.00027299	6.5584	24.4065	3.72142	1.89585	0.73	Yes (Signal peptide)	Protein modification
PAM92040.1;WP_017497241.1	50S;MULTISPECIES:	ribosomal protein L27 [Flavobacterium sp. IR1];50S ribosomal protein L27 [Flavobacterium]	0.233728	105.867	117.504	1.10993	0.150467
PAM92042.1	peptidase	M16 [Flavobacterium sp. IR1]	0.0501507	398.9	339.094	0.850074	-0.234339
PAM92043.1	peptidase	M16 [Flavobacterium sp. IR1]	0.208793	802.477	940.681	1.17222	0.229244
PAM92045.1	heavy	metal transporter [Flavobacterium sp. IR1]	0.273109	37.2883	50.8632	1.36405	0.4479
PAM92046.1	gliding	motility lipoprotein GldD [Flavobacterium sp. IR1]	0.0728833	65.5747	62.7008	0.956173	-0.0646559
PAM92051.1	ribonuclease	E/G [Flavobacterium sp. IR1]	0.00265134	7.69163	25.841	3.35963	1.7483	0.08	Other
PAM92054.1	hypothetical	protein B4N84_24885 [Flavobacterium sp. IR1]	1.71e-05	12.8502	24.0704	1.87316	0.90547
PAM92057.1	hypothetical	protein B4N84_24900 [Flavobacterium sp. IR1]	0.00579747	30.3919	34.1454	1.1235	0.168006
PAM92059.1	hypothetical	protein B4N84_24910 [Flavobacterium sp. IR1]	0.00900567	13.1292	24.5963	1.87341	0.905666
PAM92062.1	hypothetical	protein B4N84_24930 [Flavobacterium sp. IR1]	1.16e-09	162.798	540.274	3.31869	1.73061	0.93	Yes (Signal peptide)	X
PAM92067.1	hypothetical	protein B4N84_24955 [Flavobacterium sp. IR1]	0.266495	30590	27224.7	0.889988	-0.168143
PAM92068.1	hypothetical	protein B4N84_24960 [Flavobacterium sp. IR1]	2.46e-06	71.521	188.155	2.63076	1.39548	0.85	Yes (Lipoprotein signal peptide)	Transport
PAM92069.1	aspartate	aminotransferase family protein [Flavobacterium sp. IR1]	0.0394567	59.5911	52.7563	0.885305	-0.175754
PAM92075.1;WP_055097101.1	NAD(P)/FAD-dependent;MULTISPECIES:	oxidoreductase [Flavobacterium sp. IR1];NAD(P)/FAD-dependent oxidoreductase [Flavobacterium]	0.00195371	335.304	189.606	0.565473	-0.822469
PAM92078.1	nitrite	reductase [Flavobacterium sp. IR1]	0.00455788	20.9411	32.4281	1.54854	0.630906
PAM92079.1	sulfate	adenylyltransferase [Flavobacterium sp. IR1]	0.0733491	19.384	11.744	0.605859	-0.722945
PAM92081.1	phosphoadenosine	phosphosulfate reductase [Flavobacterium sp. IR1]	0.235943	40.2751	36.9557	0.917584	-0.124089
PAM92087.1	bifunctional	aspartate kinase/homoserine dehydrogenase I [Flavobacterium sp. IR1]	6.9e-07	27.9609	65.2612	2.33402	1.22281	0.07	Other
PAM92093.1	TonB-dependent	receptor [Flavobacterium sp. IR1]	9.23e-08	456.13	115.494	0.253204	-1.98163	0.95	Yes (Signal peptide)	Transport
PAM92094.1	methionine	adenosyltransferase [Flavobacterium sp. IR1]	0.00812078	1377.83	939.681	0.682001	-0.552155
PAM92100.1	hypothetical	protein B4N84_25135 [Flavobacterium sp. IR1]	0.36432	40.3407	41.097	1.01875	0.0267981
PAM92101.1	TonB-dependent	receptor [Flavobacterium sp. IR1]	0.00296136	116.666	145.218	1.24473	0.315833
PAM92102.1	GLPGLI	family protein [Flavobacterium sp. IR1]	2.27e-05	46.7085	82.6347	1.76916	0.823062
PAM92105.1	sodium-translocating	pyrophosphatase [Flavobacterium sp. IR1]	0.00018635	28.5391	54.3548	1.90457	0.929468
PAM92106.1	inorganic	pyrophosphatase [Flavobacterium sp. IR1]	5.92e-07	96.5098	51.6696	0.535382	-0.90136
PAM92107.1	hypothetical	protein B4N84_25170 [Flavobacterium sp. IR1]	0.0364518	91.3061	98.3147	1.07676	0.106696
PAM92108.1	pyruvate	dehydrogenase complex E1 component subunit beta [Flavobacterium sp. IR1]	3.17e-05	821.15	375.007	0.456686	-1.13073	0.05	Other
PAM92110.1	electron	transfer flavoprotein subunit alpha [Flavobacterium sp. IR1]	3.96e-07	39.0163	122.608	3.14249	1.65191	0.85	Other	Electron transport
PAM92111.1	hypothetical	protein B4N84_25190 [Flavobacterium sp. IR1]	0.505599	106.938	94.0617	0.879592	-0.185094
PAM92112.1	thymidylate	synthase [Flavobacterium sp. IR1]	0.000117211	332.362	147.124	0.442662	-1.17572	0.31	Other
PAM92117.1	PorT	protein [Flavobacterium sp. IR1]	9.53e-07	1376.77	2110.89	1.53322	0.616562
PAM92119.1	hypothetical	protein B4N84_25230 [Flavobacterium sp. IR1]	0.824165	39.1258	49.0715	1.2542	0.326763
PAM92120.1	class	II fructose-bisphosphate aldolase [Flavobacterium sp. IR1]	4.67e-08	1955.99	568.085	0.290433	-1.78372	0.41	Other
PAM92123.1	bifunctional	phosphoribosylaminoimidazolecarboxamide formyltransferase/IMP cyclohydrolase [Flavobacterium sp. IR1]	0.000835126	134.05	149.903	1.11826	0.161261
PAM92124.1;WP_008466528.1	rod;MULTISPECIES:	shape-determining protein [Flavobacterium sp. IR1];rod shape-determining protein [Flavobacterium]	0.00180442	454.718	227.796	0.500961	-0.99723
PAM92125.1	rod	shape-determining protein MreC [Flavobacterium sp. IR1]	0.000187518	69.7084	65.3986	0.938174	-0.0920728
PAM92129.1	alkaline	phosphatase [Flavobacterium sp. IR1]	0.0490463	5.99393	18.5147	3.08891	1.6271
PAM92130.1	metal	transporter [Flavobacterium sp. IR1]	0.713123	29.9006	24.3448	0.814191	-0.296562
PAM92136.1;WP_041516556.1	30S;MULTISPECIES:	ribosomal protein S15 [Flavobacterium sp. IR1];30S ribosomal protein S15 [Flavobacterium]	7.55e-05	19.1094	8.95426	0.46858	-1.09363	0.18	Other
PAM92137.1	polyribonucleotide	nucleotidyltransferase [Flavobacterium sp. IR1]	9.88e-07	211.274	109.982	0.520567	-0.941844
PAM92139.1	TonB-dependent	receptor [Flavobacterium sp. IR1]	0.000752023	203.918	167.176	0.819821	-0.286618
PAM92140.1	hypothetical	protein B4N84_25335 [Flavobacterium sp. IR1]	8.7e-05	484.815	301.365	0.621609	-0.685922
PAM92141.1	hypothetical	protein B4N84_25340 [Flavobacterium sp. IR1]	1.07e-07	115.767	49.1715	0.424747	-1.23533	0.9	Yes (Signal peptide)	X
PAM92142.1;WP_007804760.1	RNA;MULTISPECIES:	polymerase subunit sigma [Flavobacterium sp. IR1];sigma-70 family RNA polymerase sigma factor [Flavobacterium]	0.00547034	142.461	85.631	0.601084	-0.734361
PAM92143.1	ribulose-phosphate	3-epimerase [Flavobacterium sp. IR1]	4.77e-05	209.737	240.205	1.14527	0.195685
PAM92145.1	tail-specific	protease [Flavobacterium sp. IR1]	4.62e-07	1501.64	2366.87	1.5762	0.656447
PAM92149.1	glycoside	hydrolase [Flavobacterium sp. IR1]	0.0205939	167.234	164.713	0.984926	-0.0219126
PAM92152.1	hypothetical	protein B4N84_25395 [Flavobacterium sp. IR1]	0.0665134	4.92685	3.42824	0.695828	-0.523198
PAM92154.1	MFS	transporter [Flavobacterium sp. IR1]	2.38e-06	12.1115	3.4258	0.282855	-1.82187	0.24	Other
PAM92155.1	S9	family peptidase [Flavobacterium sp. IR1]	2.41e-05	3396.12	2821.04	0.830664	-0.267663
PAM92158.1	peptidylprolyl	isomerase [Flavobacterium sp. IR1]	0.00371996	90.8963	39.5517	0.435129	-1.20048	0.86	Other	Protein modification
PAM92162.1	hypothetical	protein B4N84_25455 [Flavobacterium sp. IR1]	0.000134959	9.7446	16.1467	1.65699	0.728564
PAM92163.1	pantothenate	kinase [Flavobacterium sp. IR1]	0.000586887	79.6496	30.5492	0.383545	-1.38253	0.05	Other
PAM92166.1	hypothetical	protein B4N84_25480 [Flavobacterium sp. IR1]	0.00504471	16657.9	21265.3	1.27659	0.352296
PAM92167.1	SusC/RagA	family TonB-linked outer membrane protein [Flavobacterium sp. IR1]	1.96e-10	14650.3	27823.7	1.89919	0.925386
PAM92168.1	LacI	family transcriptional regulator [Flavobacterium sp. IR1]	0.0811398	79.324	71.1117	0.896471	-0.157671
PAM92170.1	beta-phosphoglucomutase	[Flavobacterium sp. IR1]	0.000313102	413.553	228.622	0.552825	-0.855105
PAM92171.1	family	65 glycosyl hydrolase [Flavobacterium sp. IR1]	0.00185533	349.355	144.1	0.412475	-1.27762	0.16	Other
PAM92172.1	alpha-glucosidase	[Flavobacterium sp. IR1]	2.51e-07	25626	35087.2	1.3692	0.453334
PAM92173.1	glycerophosphodiester	phosphodiesterase [Flavobacterium sp. IR1]	5.63e-06	28.6044	8.35688	0.292154	-1.7752	0.05	Other
PAM92176.1	hypothetical	protein B4N84_25540 [Flavobacterium sp. IR1]	0.0184452	95.1886	73.3434	0.770505	-0.376123
PAM92178.1	diphosphomevalonate	decarboxylase [Flavobacterium sp. IR1]	0.0209366	49.0817	31.8744	0.649414	-0.622789
PAM92190.1	metal-dependent	hydrolase [Flavobacterium sp. IR1]	5.88e-06	174.801	95.5445	0.546591	-0.871467
PAM92194.1	hypothetical	protein B4N84_25630 [Flavobacterium sp. IR1]	0.00998775	209.5	169.529	0.809208	-0.305417
PAM92197.1	3-phytase	[Flavobacterium sp. IR1]	0.0572522	13.8988	10.6113	0.763467	-0.389362
PAM92198.1	phosphoenolpyruvate	carboxykinase (ATP) [Flavobacterium sp. IR1]	0.0138249	220.606	170.274	0.771844	-0.37362
PAM92200.1	saccharopine	dehydrogenase [Flavobacterium sp. IR1]	1.16e-05	765.481	361.3	0.471991	-1.08317	0.08	Other
PAM92201.1	peptidase	M56, BlaR1 [Flavobacterium sp. IR1]	0.00367352	750.456	717.747	0.956414	-0.0642928
PAM92204.1	peptidase	dimerization domain protein [Flavobacterium sp. IR1]	9.33e-05	444.439	213.85	0.481169	-1.05538	0.16	Other
PAM92205.1	hypothetical	protein B4N84_25690 [Flavobacterium sp. IR1]	1.22e-06	327.673	61.4157	0.18743	-2.41558	0.92	Yes (Lipoprotein signal peptide)	X
PAM92212.1	hypothetical	protein B4N84_25735 [Flavobacterium sp. IR1]	0.00040499	29.1534	56.2347	1.92892	0.947797
PAM92213.1	thioredoxin	[Flavobacterium sp. IR1]	0.00010637	1105.97	656.097	0.593232	-0.753333
PAM92220.1	hypothetical	protein B4N84_25775 [Flavobacterium sp. IR1]	0.000284249	97.8277	134.588	1.37576	0.460233
PAM92221.1	NAD(P)H:quinone	oxidoreductase type IV [Flavobacterium sp. IR1]	1.85e-09	26.187	60.2051	2.29905	1.20104	0.95	Yes (Signal peptide)	Stress response
PAM92222.1	hypothetical	protein B4N84_25785 [Flavobacterium sp. IR1]	0.0424783	23.0008	15.2389	0.662538	-0.593925
PAM92233.1	hypothetical	protein B4N84_25850 [Flavobacterium sp. IR1]	6.24e-05	100.416	65.2431	0.649725	-0.622098
PAM92235.1	SMI1/KNR4	family protein [Flavobacterium sp. IR1]	0.577108	34.6895	30.7691	0.886985	-0.173019
PAM92236.1	aspartate-semialdehyde	dehydrogenase [Flavobacterium sp. IR1]	2.5e-05	1195.68	299.819	0.250753	-1.99566	0.06	Other
PAM92237.1	large	conductance mechanosensitive channel protein MscL [Flavobacterium sp. IR1]	0.000283147	12.6147	4.98525	0.395192	-1.33937	0.05	Other
PAM92238.1	bifunctional	UDP-N-acetylmuramoyl-tripeptide:D-alanyl-D-alanine ligase/alanine racemase [Flavobacterium sp. IR1]	8.73e-07	201.044	79.6247	0.396056	-1.33622	0.05	Other
PAM92240.1	TonB-dependent	receptor [Flavobacterium sp. IR1]	7.48e-06	12.4919	37.5992	3.00988	1.58971	0.93	Yes (Signal peptide)	Transport
PAM92241.1	S9	family peptidase [Flavobacterium sp. IR1]	0.038717	1335.73	1453.21	1.08795	0.121617
PAM92242.1	oxidoreductase	[Flavobacterium sp. IR1]	0.349665	19.7575	22.0855	1.11783	0.160698
PAM92243.1	hypothetical	protein B4N84_25910 [Flavobacterium sp. IR1]	0.161438	4048.78	3818.07	0.943017	-0.0846448
PAM92245.1	hypothetical	protein B4N84_25920 [Flavobacterium sp. IR1]	3.64e-07	852.071	1239.22	1.45436	0.540389
PAM92250.1	3-isopropylmalate	dehydrogenase [Flavobacterium sp. IR1]	0.7088	159.957	130.359	0.81496	-0.2952
PAM92251.1	RNA-binding	protein [Flavobacterium sp. IR1]	0.0063789	313.703	444.742	1.41772	0.503571
PAM92258.1	hypothetical	protein B4N84_25985 [Flavobacterium sp. IR1]	5.28e-08	534.436	328.635	0.614919	-0.701531
PAM92266.1	hypothetical	protein B4N84_26025 [Flavobacterium sp. IR1]	8.49e-06	100.851	868.018	8.60696	3.1055	0.68	Other	X
PAM92267.1	hypothetical	protein B4N84_26030 [Flavobacterium sp. IR1]	3.18e-06	23.4489	317.264	13.53	3.75809	0.23	Other
PAM92270.1	acyl-CoA	dehydrogenase [Flavobacterium sp. IR1]	0.179499	252.894	255.189	1.00908	0.0130336
PAM92272.1	lysophospholipase	[Flavobacterium sp. IR1]	0.0604548	78.6913	70.565	0.896733	-0.15725
PAM92286.1	glycerol	acyltransferase [Flavobacterium sp. IR1]	0.853156	121.933	92.7008	0.760259	-0.395437
PAM92287.1	acriflavin	resistance protein [Flavobacterium sp. IR1]	0.103262	9.58783	5.51353	0.575055	-0.798228
PAM92288.1	efflux	transporter periplasmic adaptor subunit [Flavobacterium sp. IR1]	0.00447616	4.24245	9.09063	2.14278	1.09948	0.86	Other	Transport
PAM92289.1	transporter	[Flavobacterium sp. IR1]	1.53e-07	576.431	991.608	1.72025	0.782622
PAM92292.1	polyprenyl	synthetase [Flavobacterium sp. IR1]	0.00355298	117.71	31.788	0.270054	-1.88868	0.3	Other
PAM92293.1	trehalase	[Flavobacterium sp. IR1]	2.63e-06	570.222	290.996	0.510321	-0.970523
PAM92297.1	hypothetical	protein B4N84_26200 [Flavobacterium sp. IR1]	0.0227041	74.8207	56.8372	0.759644	-0.396604
PAM92298.1	2-oxoglutarate	dehydrogenase E1 component [Flavobacterium sp. IR1]	0.29254	126.182	126.935	1.00597	0.00858549
PAM92299.1	dihydrolipoyllysine-residue	succinyltransferase [Flavobacterium sp. IR1]	0.0588668	101.841	75.633	0.742662	-0.429223
PAM92300.1	TonB-dependent	siderophore receptor [Flavobacterium sp. IR1]	0.000103854	701.185	562.102	0.801646	-0.318963
PAM92306.1	thioredoxin	[Flavobacterium sp. IR1]	2.79e-05	34.3245	61.1629	1.7819	0.83342
PAM92307.1	aspartate--tRNA	ligase [Flavobacterium sp. IR1]	0.0528159	105.902	74.5113	0.70359	-0.507193
PAM92311.1	NADH-quinone	oxidoreductase subunit C [Flavobacterium sp. IR1]	0.92948	45.8703	44.0653	0.960649	-0.0579184
PAM92312.1	NADH	dehydrogenase subunit D [Flavobacterium sp. IR1]	0.00440772	82.5139	93.5694	1.13398	0.1814
PAM92313.1	NAD(P)H-dependent	oxidoreductase subunit E [Flavobacterium sp. IR1]	0.016027	24.4847	18.8071	0.768117	-0.380602
PAM92314.1	NADH	oxidoreductase (quinone) subunit F [Flavobacterium sp. IR1]	0.287368	126.927	164.916	1.2993	0.377731
PAM92316.1	NADH-quinone	oxidoreductase subunit H [Flavobacterium sp. IR1]	0.00195715	155.109	227.968	1.46973	0.555547
PAM92317.1	NADH-quinone	oxidoreductase subunit I [Flavobacterium sp. IR1]	0.00922303	17.1609	24.2524	1.41323	0.498998
PAM92320.1	NADH-quinone	oxidoreductase subunit L [Flavobacterium sp. IR1]	0.00202727	36.1859	8.19166	0.226377	-2.1432	0.24	Other
PAM92329.1	aldehyde	dehydrogenase family protein [Flavobacterium sp. IR1]	5.73e-07	58.3751	265.897	4.55496	2.18744	0.07	Other
PAM92330.1	3',5'-cyclic-nucleotide	phosphodiesterase [Flavobacterium sp. IR1]	0.00180715	26.4587	36.1078	1.36468	0.448568
PAM92331.1	3-hydroxyanthranilate	3,4-dioxygenase [Flavobacterium sp. IR1]	2.81e-07	609.789	291.614	0.478221	-1.06425	0.1	Other
PAM92335.1	aspartate	kinase [Flavobacterium sp. IR1]	0.354733	30.4891	36.0158	1.18127	0.240334
PAM92336.1	alpha-glucosidase	[Flavobacterium sp. IR1]	9.76e-06	210.668	330.199	1.56739	0.648366
PAM92337.1	transcription-repair	coupling factor [Flavobacterium sp. IR1]	0.000331692	6.47668	43.8496	6.77038	2.75924	0.11	Other
PAM92339.1	NAD-dependent	epimerase [Flavobacterium sp. IR1]	0.333154	68.2697	61.5882	0.902132	-0.14859
PAM92342.1	hypothetical	protein B4N84_26435 [Flavobacterium sp. IR1]	0.000336869	18.858	32.6886	1.7334	0.793609
PAM92343.1	hypothetical	protein B4N84_26440 [Flavobacterium sp. IR1]	0.0906323	72.5121	92.7581	1.27921	0.355251
PAM92346.1	peptidase	M1 [Flavobacterium sp. IR1]	0.000451585	3244.77	2436.57	0.750921	-0.413267
PAM92347.1	peptidase	S8 [Flavobacterium sp. IR1]	0.901465	2213.94	2110.19	0.95314	-0.0692407
PAM92348.1	hypothetical	protein B4N84_26465 [Flavobacterium sp. IR1]	4.02e-05	105.969	718.825	6.78334	2.762	0.94	Yes (Signal peptide)	Cell division
PAM92349.1	hypothetical	protein B4N84_26470 [Flavobacterium sp. IR1]	0.00106321	581.496	894.988	1.53911	0.622099
PAM92350.1	hypothetical	protein B4N84_26475 [Flavobacterium sp. IR1]	0.00388451	559.095	912.401	1.63193	0.706575
PAM92351.1	MBL	fold metallo-hydrolase [Flavobacterium sp. IR1]	3.52e-07	559.865	311.491	0.556368	-0.845889
PAM92353.1	Fe-S	cluster assembly protein SufB [Flavobacterium sp. IR1]	0.646399	32.2582	33.5744	1.0408	0.0576976
PAM92355.1	FMN	reductase [Flavobacterium sp. IR1]	1.26e-08	27.2991	55.5998	2.03669	1.02622	0.08	Other
PAM92356.1;WP_017494567.1	ABC;MULTISPECIES:	transporter ATP-binding protein [Flavobacterium sp. IR1];Fe-S cluster assembly ATPase SufC [Flavobacterium]	0.0287292	35.5666	41.9067	1.17826	0.236661
PAM92358.1	Fe-S	cluster assembly protein SufD [Flavobacterium sp. IR1]	0.00159105	19.1151	13.7443	0.719029	-0.475879
PAM92360.1	cysteine	desulfurase CsdA [Flavobacterium sp. IR1]	0.0131874	1087.31	787.784	0.724523	-0.464897
PAM92361.1	hypothetical	protein B4N84_26530 [Flavobacterium sp. IR1]	1.18e-05	168.549	83.6409	0.49624	-1.01089	0.71	Yes (Lipoprotein signal peptide)	X
PAM92363.1	SUF	system Fe-S cluster assembly protein [Flavobacterium sp. IR1]	0.00165967	7.44489	12.9749	1.7428	0.801405
PAM92365.1	hypothetical	protein B4N84_26550 [Flavobacterium sp. IR1]	0.00107604	18.5515	43.1973	2.32851	1.21941	0.69	Yes (Signal peptide)	X
PAM92367.1	hypothetical	protein B4N84_26560 [Flavobacterium sp. IR1]	8.79e-07	71.1791	128.933	1.81139	0.857094
PAM92372.1	oxidoreductase	[Flavobacterium sp. IR1]	0.0383724	410.492	446.522	1.08777	0.12138
PAM92378.1	RIP	metalloprotease RseP [Flavobacterium sp. IR1]	8.49e-06	120.786	64.492	0.533936	-0.905261
PAM92380.1	aminopeptidase	[Flavobacterium sp. IR1]	1.33e-07	540.244	1246.19	2.30672	1.20584	0.95	Yes (Lipoprotein signal peptide)	Proteolysis
PAM92381.1	pyruvate	kinase [Flavobacterium sp. IR1]	3.59e-05	1822.08	1092.97	0.599848	-0.737331
PAM92384.1	beta-ketoacyl-[acyl-carrier-protein]	synthase II [Flavobacterium sp. IR1]	0.00463277	114.61	77.9542	0.680172	-0.55603
PAM92386.1	phosphoribosylglycinamide	formyltransferase [Flavobacterium sp. IR1]	0.00151373	25.8262	46.4283	1.79772	0.846167
PAM92392.1	amidophosphoribosyltransferase	[Flavobacterium sp. IR1]	0.784397	150.934	139.98	0.927424	-0.108699
PAM92393.1	superoxide	dismutase [Flavobacterium sp. IR1]	0.0751239	887.14	843.809	0.951157	-0.0722446
PAM92395.1	50S	ribosomal protein L25/general stress protein Ctc [Flavobacterium sp. IR1]	0.349169	25.6821	22.3116	0.868761	-0.202968
PAM92396.1	ribose-phosphate	pyrophosphokinase [Flavobacterium sp. IR1]	5.01e-06	27.3124	4.38722	0.160631	-2.63818	0.06	Other
PAM92402.1	galactose-1-phosphate	uridylyltransferase [Flavobacterium sp. IR1]	2.58e-06	218.308	130.39	0.597275	-0.743532
PAM92403.1	16S	rRNA (cytosine(1402)-N(4))-methyltransferase [Flavobacterium sp. IR1]	0.000729672	42.6064	15.428	0.362105	-1.46552	0.11	Other
PAM92405.1	type	I methionyl aminopeptidase [Flavobacterium sp. IR1]	7.78e-06	13.7622	27.6094	2.00618	1.00445	0.06	Other
PAM92409.1	di-trans,poly-cis-decaprenylcistransferase	[Flavobacterium sp. IR1]	0.000638909	37.8346	50.1419	1.32529	0.406311
PAM92410.1	hypothetical	protein B4N84_24135 [Flavobacterium sp. IR1]	1.58e-07	2720.58	1738.08	0.638863	-0.646422
PAM92412.1	gliding	motility protein RemB [Flavobacterium sp. IR1]	1.63e-05	16.7126	27.7155	1.65836	0.72976
PAM92413.1	hypothetical	protein B4N84_24665 [Flavobacterium sp. IR1]	0.000295065	93.677	113.414	1.21069	0.275834
PAM92418.1	O-succinylhomoserine	sulfhydrylase [Flavobacterium sp. IR1]	0.171263	116.567	108.691	0.932436	-0.100923
PAM92421.1	RagB/SusD	family nutrient uptake outer membrane protein [Flavobacterium sp. IR1]	4.22e-05	24617.4	33982.4	1.38042	0.46511
PAM92422.1	alpha-amlyase	[Flavobacterium sp. IR1]	0.00386432	2876.1	3179.99	1.10566	0.144906
PAM92423.1	hypothetical	protein B4N84_25790 [Flavobacterium sp. IR1]	3.65e-05	196.426	383.022	1.94995	0.963439
PAM92426.1	hypothetical	protein B4N84_25885 [Flavobacterium sp. IR1]	3.69e-06	26.6422	77.4841	2.90832	1.54019	0.54	Yes (Signal peptide)	Transport
PAM92427.1	hydrolase	TatD [Flavobacterium sp. IR1]	8.86e-05	118.573	73.0406	0.615997	-0.699005
PAM92429.1	TonB-dependent	receptor [Flavobacterium sp. IR1]	0.439591	2898.07	2725.99	0.940622	-0.0883133
PAM92430.1	LD-carboxypeptidase	[Flavobacterium sp. IR1]	2.01e-07	357.621	454.859	1.2719	0.346985
PAM92447.1	X-Pro	aminopeptidase [Flavobacterium sp. IR1]	7.02e-05	1687.65	1096.98	0.650005	-0.621477
PAM92452.1	hypothetical	protein B4N84_22320 [Flavobacterium sp. IR1]	0.120411	85.7654	68.1272	0.794343	-0.332166
PAM92455.1	succinate	dehydrogenase [Flavobacterium sp. IR1]	5.09e-05	708.302	1011.71	1.42836	0.51436
PAM92456.1	succinate	dehydrogenase flavoprotein subunit [Flavobacterium sp. IR1]	0.000127974	2602.05	4199.02	1.61373	0.690403
PAM92457.1	succinate	dehydrogenase/fumarate reductase iron-sulfur subunit [Flavobacterium sp. IR1]	1.71e-05	33.5698	57.6617	1.71767	0.780451
PAM92458.1	hypothetical	protein B4N84_22350 [Flavobacterium sp. IR1]	0.15328	33.7664	43.3097	1.28263	0.359102
PAM92462.1	hypothetical	protein B4N84_22370 [Flavobacterium sp. IR1]	0.00729686	320.101	218.728	0.683308	-0.549392
PAM92463.1	hypothetical	protein B4N84_22395 [Flavobacterium sp. IR1]	0.0065653	7.38061	25.3295	3.4319	1.77901	0.05	Other
PAM92464.1	hypothetical	protein B4N84_22400 [Flavobacterium sp. IR1]	0.605214	55.1282	64.9669	1.17847	0.236913
PAM92465.1	transcriptional	regulator [Flavobacterium sp. IR1]	0.0365624	106.844	90.0288	0.842622	-0.247042
PAM92468.1	hypothetical	protein B4N84_22425 [Flavobacterium sp. IR1]	0.0290721	30.9421	38.6665	1.24964	0.321514
PAM92474.1	acetyl-CoA	carboxylase, biotin carboxyl carrier protein [Flavobacterium sp. IR1]	2.03e-05	21.3776	127.423	5.96059	2.57545	0.66	Other	Lipid metabolism/Fatty acid biosynthesis/Carbon fixation/Pyruvate metabolism/Propanoate metabolism
PAM92475.1	acetyl-CoA	carboxylase biotin carboxylase subunit [Flavobacterium sp. IR1]	5.84e-07	24.9057	57.3444	2.30247	1.20318	0.07	Other
PAM92477.1	hypothetical	protein B4N84_22475 [Flavobacterium sp. IR1]	2.25e-06	349.904	92.0053	0.262944	-1.92717	0.93	Yes (Signal peptide)	X
PAM92479.1	hypothetical	protein B4N84_22485 [Flavobacterium sp. IR1]	5.97e-05	4523.69	1818.12	0.40191	-1.31505	0.93	Yes (Signal peptide)	X
PAM92480.1	hypothetical	protein B4N84_22490 [Flavobacterium sp. IR1]	1.59e-06	2180.94	1300.02	0.596081	-0.74642
PAM92481.1	hypothetical	protein B4N84_22495 [Flavobacterium sp. IR1]	0.000189982	30263.5	23288.3	0.769517	-0.377974
PAM92482.1	hypothetical	protein B4N84_22500 [Flavobacterium sp. IR1]	0.00276192	190.471	278.304	1.46113	0.547087
PAM92485.1	S9	family peptidase [Flavobacterium sp. IR1]	1.21e-06	2703.91	1907.6	0.705496	-0.503291
PAM92494.1	hypothetical	protein B4N84_22565 [Flavobacterium sp. IR1]	0.0378121	44.1862	48.5942	1.09976	0.137187
PAM92506.1	16S	rRNA (cytidine(1402)-2'-O)-methyltransferase [Flavobacterium sp. IR1]	0.0221849	8.7853	24.2636	2.76184	1.46563
PAM92507.1	hypothetical	protein B4N84_22640 [Flavobacterium sp. IR1]	2.23e-05	82.469	12.2265	0.148256	-2.75384	0.37	Other
PAM92508.1	hypothetical	protein B4N84_22650 [Flavobacterium sp. IR1]	0.000403736	23.7348	30.7422	1.29524	0.373216
PAM92510.1	asparagine--tRNA	ligase [Flavobacterium sp. IR1]	0.00329899	84.8388	54.1609	0.638397	-0.647474
PAM92512.1	antifreeze	protein [Flavobacterium sp. IR1]	0.0268342	56.4976	68.7626	1.21709	0.283433
PAM92514.1	transporter	[Flavobacterium sp. IR1]	0.029694	7.03495	9.71276	1.38064	0.465342
PAM92519.1	hypothetical	protein B4N84_22705 [Flavobacterium sp. IR1]	0.0279044	101.725	67.9576	0.668052	-0.581968
PAM92522.1	thioredoxin	family protein [Flavobacterium sp. IR1]	0.250192	40.8684	40.5396	0.991955	-0.0116539
PAM92528.1	leucine--tRNA	ligase [Flavobacterium sp. IR1]	0.0017637	80.6383	47.9791	0.594991	-0.749061
PAM92532.1	hypothetical	protein B4N84_22770 [Flavobacterium sp. IR1]	0.0210237	33.0522	50.2756	1.5211	0.605112
PAM92537.1	uroporphyrinogen-III	synthase [Flavobacterium sp. IR1]	0.00137604	561.849	320.443	0.570336	-0.810116
PAM92539.1	dolichyl-phosphate	beta-D-mannosyltransferase [Flavobacterium sp. IR1]	0.273031	30.1058	33.5889	1.1157	0.157945
PAM92540.1	dihydroorotase	[Flavobacterium sp. IR1]	0.0499849	7.69904	14.4028	1.87073	0.9036
PAM92543.1	tyrosine--tRNA	ligase [Flavobacterium sp. IR1]	0.0172259	185.461	144.471	0.778985	-0.360333
PAM92545.1	T9SS	C-terminal target domain-containing protein [Flavobacterium sp. IR1]	0.000188668	55.2204	77.8891	1.41051	0.49622
PAM92546.1	hypothetical	protein B4N84_22840 [Flavobacterium sp. IR1]	0.041705	25.6703	22.4069	0.872873	-0.196157
PAM92550.1	porin	[Flavobacterium sp. IR1]	0.00358339	5.76204	8.91241	1.54675	0.629237
PAM92552.1	hypothetical	protein B4N84_22870 [Flavobacterium sp. IR1]	0.0945901	69.581	39.5065	0.567777	-0.816604
PAM92553.1	hypothetical	protein B4N84_22875 [Flavobacterium sp. IR1]	0.213567	9.89223	7.38942	0.746992	-0.420834
PAM92554.1	aspartate	kinase [Flavobacterium sp. IR1]	0.000108263	278.235	148.034	0.532044	-0.910382
PAM92556.1	fructose-bisphosphatase	class I [Flavobacterium sp. IR1]	9.72e-05	201.705	315.032	1.56185	0.643253
PAM92557.1	fructose	1,6-bisphosphatase [Flavobacterium sp. IR1]	0.0267725	114.832	181.524	1.58078	0.66064
PAM92559.1	CMP	deaminase [Flavobacterium sp. IR1]	0.0109461	6.60298	19.9304	3.0184	1.59378
PAM92561.1	DUF4440	domain-containing protein [Flavobacterium sp. IR1]	2.11e-10	422.972	85.4306	0.201977	-2.30774	0.15	Other
PAM92564.1	DUF3109	domain-containing protein [Flavobacterium sp. IR1]	6.72e-07	9.83422	53.6987	5.46039	2.449	0.04	Other
PAM92565.1	ribonucleoside-diphosphate	reductase subunit alpha [Flavobacterium sp. IR1]	0.165479	10.469	17.3841	1.66053	0.731648
PAM92570.1	3-deoxy-7-phosphoheptulonate	synthase [Flavobacterium sp. IR1]	2.72e-08	186.534	48.7665	0.261435	-1.93548	0.16	Other
PAM92573.1	hypothetical	protein B4N84_22990 [Flavobacterium sp. IR1]	6.41e-09	14.2631	236.458	16.5783	4.05122	0.93	Yes (Lipoprotein signal peptide)	X
PAM92578.1	hypothetical	protein B4N84_23025 [Flavobacterium sp. IR1]	2.37e-05	10.6699	34.0229	3.18868	1.67296	0.06	Yes (Signal peptide)	X
PAM92580.1	3-phosphoshikimate	1-carboxyvinyltransferase [Flavobacterium sp. IR1]	6.97e-07	268.709	93.3374	0.347355	-1.52552	0.06	Other
PAM92581.1	tRNA	preQ1(34) S-adenosylmethionine ribosyltransferase-isomerase QueA [Flavobacterium sp. IR1]	0.152775	54.1957	60.9586	1.12479	0.16965
PAM92582.1	kynureninase	[Flavobacterium sp. IR1]	0.0317039	280.859	335.745	1.19542	0.25752
PAM92586.1	penicillin	acylase family protein [Flavobacterium sp. IR1]	0.274907	28.9172	34.3905	1.18928	0.250084
PAM92587.1	hypothetical	protein B4N84_23070 [Flavobacterium sp. IR1]	0.000135829	127.267	395.847	3.11038	1.63709	0.53	Yes (Signal peptide)	X
PAM92590.1	kynurenine	3-monooxygenase [Flavobacterium sp. IR1]	0.298964	39.8969	37.3403	0.93592	-0.0955433
PAM92591.1	ATPase	[Flavobacterium sp. IR1]	3.78e-07	65.2193	103.891	1.59295	0.671699
PAM92592.1	MotA/TolQ/ExbB	proton channel family protein [Flavobacterium sp. IR1]	0.136006	444.303	342.884	0.771735	-0.373823
PAM92593.1	biopolymer	transporter ExbD [Flavobacterium sp. IR1]	0.587437	6.18001	14.8958	2.41033	1.26923
PAM92595.1	energy	transducer TonB [Flavobacterium sp. IR1]	0.000966241	1273.86	847.221	0.665081	-0.588399
PAM92597.1	phosphate	ABC transporter substrate-binding protein [Flavobacterium sp. IR1]	2.15e-05	34.9764	81.3388	2.32554	1.21756	0.3	Yes (Lipoprotein signal peptide)	Transport
PAM92598.1	hypothetical	protein B4N84_23125 [Flavobacterium sp. IR1]	1.63e-06	1982.58	3230.27	1.62933	0.704278			Mutant M52
PAM92599.1	7-carboxy-7-deazaguanine	synthase QueE [Flavobacterium sp. IR1]	6.13e-07	29.5987	12.6486	0.427335	-1.22656	0.12	Other
PAM92604.1	hypothetical	protein B4N84_22380 [Flavobacterium sp. IR1]	0.0013489	328.166	192.404	0.586302	-0.770284
PAM92606.1	methylmalonyl-CoA	epimerase [Flavobacterium sp. IR1]	0.566284	87.0039	61.7456	0.709688	-0.494743
PAM92611.1	hypothetical	protein B4N84_22920 [Flavobacterium sp. IR1]	0.00064949	220.72	131.04	0.593696	-0.752203
PAM92613.1	ribonucleoside-diphosphate	reductase [Flavobacterium sp. IR1]	3.98e-05	535.549	355.7	0.664179	-0.590356
PAM92656.1	hypothetical	protein B4N84_21210 [Flavobacterium sp. IR1]	0.000346871	21.456	34.685	1.61656	0.692931
PAM92657.1	hypothetical	protein B4N84_21215 [Flavobacterium sp. IR1]	0.00290729	131.391	139.571	1.06226	0.0871363
PAM92669.1	pyridine	nucleotide-disulfide oxidoreductase [Flavobacterium sp. IR1]	1.73e-05	32.9689	55.9841	1.69809	0.76391
PAM92670.1	hypothetical	protein B4N84_21285 [Flavobacterium sp. IR1]	0.488273	894.04	850.961	0.951815	-0.071247
PAM92671.1	3-oxoacyl-ACP	reductase [Flavobacterium sp. IR1]	0.0599588	50.7076	41.9119	0.826541	-0.274841
PAM92677.1	hypothetical	protein B4N84_21320 [Flavobacterium sp. IR1]	1.13e-07	39.7281	61.6335	1.55138	0.633555
PAM92681.1	peptidase	[Flavobacterium sp. IR1]	1.52e-05	48.3267	119.717	2.47725	1.30874	0.14	Other
PAM92686.1	acyl	carrier protein [Flavobacterium sp. IR1]	0.000220566	44.1744	12.7515	0.288664	-1.79254	0.05	Other
PAM92690.1	cell	envelope biogenesis protein LolA [Flavobacterium sp. IR1]	0.0140642	28.7952	42.9655	1.49211	0.577349
PAM92692.1	hypothetical	protein B4N84_21405 [Flavobacterium sp. IR1]	0.00622804	75.2859	107.251	1.42458	0.510539
PAM92693.1	hypothetical	protein B4N84_21410 [Flavobacterium sp. IR1]	4.86e-06	9.50934	16.7671	1.76322	0.818213
PAM92695.1	hypothetical	protein B4N84_21420 [Flavobacterium sp. IR1]	0.291886	465.536	454.574	0.976452	-0.0343782
PAM92700.1	tRNA	dihydrouridine synthase DusB [Flavobacterium sp. IR1]	0.00850435	16.706	27.2676	1.63221	0.706826
PAM92713.1	ribosome-binding	factor A [Flavobacterium sp. IR1]	0.234186	39.8356	38.5175	0.966913	-0.048542
PAM92714.1	peptidase	M23 [Flavobacterium sp. IR1]	5.4e-09	214.895	18.9282	0.0880811	-3.50502	0.48	Yes (Signal peptide)	Cell division
PAM92715.1	hypothetical	protein B4N84_21525 [Flavobacterium sp. IR1]	0.000956016	324.654	206.775	0.636908	-0.650842			LPS localisation
PAM92716.1	cytochrome	C biosynthesis protein [Flavobacterium sp. IR1]	3.04e-05	605.41	387.342	0.6398	-0.644306			LPS assembly
PAM92717.1	nucleotidyltransferase	[Flavobacterium sp. IR1]	0.179489	25.6473	14.7493	0.575083	-0.798158
PAM92722.1;WP_053472983.1	F0F1;MULTISPECIES:	ATP synthase subunit alpha [Flavobacterium sp. IR1];F0F1 ATP synthase subunit alpha [Flavobacterium]	1.8e-05	181.082	283.969	1.56818	0.649087
PAM92723.1	ATP	synthase F1 subunit delta [Flavobacterium sp. IR1]	0.441956	8.51272	7.09424	0.833368	-0.262974
PAM92724.1	ATP	synthase F0 subunit B [Flavobacterium sp. IR1]	1.15e-05	69.9446	32.7412	0.468103	-1.0951	0.13	Other
PAM92725.1;WP_008465835.1	ATP;MULTISPECIES:	synthase F0 subunit C [Flavobacterium sp. IR1];ATP synthase F0 subunit C [Flavobacterium]	0.0199725	66.5264	181.679	2.73093	1.44939
PAM92726.1	ATP	synthase F0 subunit A [Flavobacterium sp. IR1]	0.0229567	381.174	274.793	0.720911	-0.472108
PAM92729.1	hypothetical	protein B4N84_21595 [Flavobacterium sp. IR1]	1.19e-05	579.385	195.469	0.337372	-1.56759	0.14	Other
PAM92730.1	gliding	motility protein [Flavobacterium sp. IR1]	0.000146986	155.743	98.7845	0.634279	-0.656811
PAM92733.1	flavodoxin	reductase [Flavobacterium sp. IR1]	0.00444641	57.4434	40.4959	0.70497	-0.504366
PAM92734.1	hypothetical	protein B4N84_21625 [Flavobacterium sp. IR1]	0.00933456	14.592	15.3414	1.05135	0.0722474
PAM92735.1	uracil	phosphoribosyltransferase [Flavobacterium sp. IR1]	0.000373779	485.55	609.015	1.25428	0.326858
PAM92737.1	uracil	phosphoribosyltransferase [Flavobacterium sp. IR1]	0.0510311	30.7974	20.1741	0.655059	-0.610304
PAM92738.1	phosphoribosylamine--glycine	ligase [Flavobacterium sp. IR1]	9.65e-09	1054.17	422.153	0.400461	-1.32027	0.06	Other
PAM92748.1	hypothetical	protein B4N84_21700 [Flavobacterium sp. IR1]	0.248703	8.88353	23.1599	2.60706	1.38242
PAM92749.1	hypothetical	protein B4N84_21705 [Flavobacterium sp. IR1]	5.31e-05	32.0283	48.3181	1.50861	0.593217
PAM92751.1	hypothetical	protein B4N84_21715 [Flavobacterium sp. IR1]	0.000141963	20.0644	46.146	2.2999	1.20157	0.11	Other
PAM92754.1	licheninase	[Flavobacterium sp. IR1]	0.00642211	1262.12	1511.26	1.1974	0.259908
PAM92757.1	hypothetical	protein B4N84_21745 [Flavobacterium sp. IR1]	0.000453548	50.9094	54.4098	1.06876	0.0959354
PAM92758.1	hypothetical	protein B4N84_21750 [Flavobacterium sp. IR1]	6.79e-07	23.7737	55.6224	2.33966	1.2263	0.03	Yes (Signal peptide)	X
PAM92777.1	ribose	5-phosphate isomerase B [Flavobacterium sp. IR1]	0.378013	2.38969	3.05721	1.27933	0.355392
PAM92779.1	ribonuclease	R [Flavobacterium sp. IR1]	5.62e-05	70.6651	37.8207	0.53521	-0.901823
PAM92780.1	chaperonin	[Flavobacterium sp. IR1]	0.784706	553.746	467.894	0.844961	-0.243043
PAM92783.1	dihydroneopterin	aldolase [Flavobacterium sp. IR1]	7.21e-07	277.072	520.916	1.88007	0.910789
PAM92785.1	glutamine--tRNA	ligase [Flavobacterium sp. IR1]	0.0325211	163.263	127.086	0.778412	-0.361393
PAM92787.1	YtxH	domain-containing protein [Flavobacterium sp. IR1]	0.00580918	57.1215	73.7999	1.29198	0.369584
PAM92790.1	glutamate--tRNA	ligase [Flavobacterium sp. IR1]	0.00143286	268.547	180.043	0.670435	-0.576831
PAM92799.1	tryptophan--tRNA	ligase [Flavobacterium sp. IR1]	0.00131513	154.59	53.2111	0.344208	-1.53865	0.1	OTher
PAM92803.1	hypothetical	protein B4N84_21995 [Flavobacterium sp. IR1]	0.852404	2066.52	2074.27	1.00375	0.00540462
PAM92804.1	hypothetical	protein B4N84_22000 [Flavobacterium sp. IR1]	0.18417	59.287	53.8715	0.908655	-0.138196
PAM92806.1	hypothetical	protein B4N84_22010 [Flavobacterium sp. IR1]	0.000194181	26742.1	16545	0.61869	-0.692712
PAM92807.1	hypothetical	protein B4N84_22015 [Flavobacterium sp. IR1]	0.0416695	4049.89	4437.82	1.09579	0.131968
PAM92808.1	hypothetical	protein B4N84_22020 [Flavobacterium sp. IR1]	2.53e-08	48038.5	77654.5	1.6165	0.692878
PAM92809.1	hypothetical	protein B4N84_22025 [Flavobacterium sp. IR1]	0.000232194	11457.3	17829.4	1.55615	0.637986
PAM92810.1	phosphoglycerate	kinase [Flavobacterium sp. IR1]	0.211791	78.3557	75.1833	0.959513	-0.0596262
PAM92813.1	hypothetical	protein B4N84_22045 [Flavobacterium sp. IR1]	0.0428533	64.2287	96.8454	1.50782	0.592466
PAM92817.1	histidine	ammonia-lyase [Flavobacterium sp. IR1]	5.77e-05	48.5529	75.4459	1.55389	0.635885
PAM92824.1	recombinase	RecA [Flavobacterium sp. IR1]	0.00317249	71.7556	76.4847	1.0659	0.0920782
PAM92858.1	hypothetical	protein B4N84_20585 [Flavobacterium sp. IR1]	1.08e-05	96.7616	136.546	1.41116	0.496877
PAM92859.1	proline	dehydrogenase [Flavobacterium sp. IR1]	8.61e-05	145.984	266.811	1.82767	0.870004
PAM92860.1	3-dehydroquinate	synthase [Flavobacterium sp. IR1]	0.253637	90.0648	86.4284	0.959625	-0.0594578
PAM92862.1;WP_007811609.1	deoxyhypusine;MULTISPECIES:	synthase [Flavobacterium sp. IR1];deoxyhypusine synthase family protein [Flavobacterium]	0.00856575	350.102	493.292	1.409	0.494667
PAM92863.1	DNA	primase [Flavobacterium sp. IR1]	0.0291175	2623.09	1243.46	0.474042	-1.07691
PAM92866.1	phosphoenolpyruvate	carboxylase [Flavobacterium sp. IR1]	0.000201922	55.8309	70.3958	1.26087	0.334424
PAM92867.1;WP_007805990.1	transcriptional;MULTISPECIES:	regulator [Flavobacterium sp. IR1];winged helix-turn-helix transcriptional regulator [Flavobacterium]	1.47e-05	38.4399	57.6813	1.50056	0.585501
PAM92868.1	peptidase	M14 [Flavobacterium sp. IR1]	0.241874	41.3313	38.9098	0.941412	-0.0871017
PAM92872.1	peptidase	M23 [Flavobacterium sp. IR1]	0.000178433	14.4107	43.3442	3.00777	1.5887	0.05	Other
PAM92873.1	hypothetical	protein B4N84_20660 [Flavobacterium sp. IR1]	0.00155108	134.085	213.006	1.58858	0.66774
PAM92875.1	limonene-1,2-epoxide	hydrolase [Flavobacterium sp. IR1]	0.00548799	36.2539	58.2701	1.60728	0.684617
PAM92883.1	o-succinylbenzoate	synthase [Flavobacterium sp. IR1]	0.303265	21.7586	36.6789	1.68571	0.75336
PAM92884.1	hypothetical	protein B4N84_20720 [Flavobacterium sp. IR1]	0.180101	680.008	680.329	1.00047	0.000682258
PAM92885.1	metal-dependent	hydrolase [Flavobacterium sp. IR1]	0.359421	8.15232	10.2711	1.2599	0.333311
PAM92887.1;WP_035681238.1	1,4-dihydroxy-2-naphthoyl-CoA;MULTISPECIES:	synthase [Flavobacterium sp. IR1];1,4-dihydroxy-2-naphthoyl-CoA synthase [Flavobacterium]	0.923863	30.1876	31.7914	1.05313	0.0746822
PAM92889.1	2-succinyl-5-enolpyruvyl-6-hydroxy-3-cyclohexene-1-carboxylic-acid	synthase [Flavobacterium sp. IR1]	0.00110206	230.46	152.441	0.661463	-0.596267
PAM92890.1	thioredoxin	[Flavobacterium sp. IR1]	0.0909924	104.791	93.6343	0.89353	-0.162412
PAM92892.1	glutathione	peroxidase [Flavobacterium sp. IR1]	0.000246513	153.766	196.914	1.2806	0.356825
PAM92893.1	RNA	polymerase subunit sigma-70 [Flavobacterium sp. IR1]	0.737236	42.7063	20.8039	0.48714	-1.03759
PAM92894.1	anti-sigma	factor [Flavobacterium sp. IR1]	0.347673	83.0359	87.2136	1.05031	0.0708179
PAM92897.1	glycoside	hydrolase [Flavobacterium sp. IR1]	0.200797	153.559	186.595	1.21513	0.281116
PAM92898.1	hypothetical	protein B4N84_20795 [Flavobacterium sp. IR1]	0.912707	7.74036	9.59543	1.23966	0.309946
PAM92899.1	3-deoxy-D-manno-octulosonate	8-phosphate phosphatase [Flavobacterium sp. IR1]	5.14e-05	22.6201	92.6997	4.09812	2.03496	0.06	Other
PAM92901.1	septum	formation protein Maf [Flavobacterium sp. IR1]	0.516416	47.5695	41.8379	0.87951	-0.185229
PAM92906.1	LmbE	family protein [Flavobacterium sp. IR1]	2.47e-06	3949.18	4303.82	1.0898	0.124066
PAM92909.1	DUF4440	domain-containing protein [Flavobacterium sp. IR1]	0.0769178	104.542	80.7782	0.772685	-0.372048
PAM92911.1	dihydrolipoamide	dehydrogenase [Flavobacterium sp. IR1]	0.00175047	15.4703	26.4641	1.71064	0.774538
PAM92915.1	hypothetical	protein B4N84_20880 [Flavobacterium sp. IR1]	0.694609	66.2084	66.0576	0.997722	-0.00328977
PAM92918.1	peptidase	M56 [Flavobacterium sp. IR1]	3.52e-05	9.92162	24.6935	2.48885	1.31548	0.14	Other
PAM92921.1	fasciclin	[Flavobacterium sp. IR1]	2.26e-05	219.62	117.582	0.535388	-0.901343
PAM92924.1	30S	ribosomal protein S1 [Flavobacterium sp. IR1]	4.35e-05	220.58	108.135	0.49023	-1.02847	0.05	Other
PAM92928.1	penicillin-binding	protein [Flavobacterium sp. IR1]	0.000262207	9.07725	13.549	1.49263	0.577857
PAM92929.1	endopeptidase	La [Flavobacterium sp. IR1]	0.0706897	96.3459	80.0431	0.830789	-0.267446
PAM92930.1	hypothetical	protein B4N84_20960 [Flavobacterium sp. IR1]	0.0012464	139.683	83.6037	0.598522	-0.740524
PAM92933.1	DUF2807	domain-containing protein [Flavobacterium sp. IR1]	0.637638	101.329	67.0143	0.661352	-0.596511
PAM92935.1	peptidase	M48 [Flavobacterium sp. IR1]	0.00100792	675.704	367.006	0.543146	-0.880589
PAM92936.1	glycosyl	hydrolase [Flavobacterium sp. IR1]	0.000513555	102.601	151.955	1.48103	0.566598
PAM92938.1	glucose-1-phosphate	adenylyltransferase [Flavobacterium sp. IR1]	0.00363618	85.5478	53.4908	0.625274	-0.67744
PAM92969.1	hypothetical	protein B4N84_20445, partial [Flavobacterium sp. IR1]	0.00210478	59.7587	79.6304	1.33253	0.41417
PAM93067.1	hypothetical	protein B4N84_19895, partial [Flavobacterium sp. IR1]	0.0156012	208.997	262.173	1.25444	0.32704
PAM93070.1	RelA/SpoT	family protein [Flavobacterium sp. IR1]	0.00143549	26.8357	11.3209	0.421861	-1.24516	0.08	OTher
PAM93072.1	adenylosuccinate	synthase [Flavobacterium sp. IR1]	0.230709	1030.41	1211.99	1.17623	0.234165
PAM93073.1	GDP-mannose	pyrophosphatase [Flavobacterium sp. IR1]	0.620376	18.7455	21.1669	1.12918	0.17527
PAM93075.1	hypothetical	protein B4N84_18970 [Flavobacterium sp. IR1]	0.634387	117.996	104.666	0.887033	-0.17294
PAM93076.1	IMP	dehydrogenase [Flavobacterium sp. IR1]	0.000139778	1154.14	314.986	0.272919	-1.87346	0.06	Other
PAM93077.1	hypothetical	protein B4N84_18980 [Flavobacterium sp. IR1]	1.91e-13	497.027	1544.84	3.10815	1.63606	0.76	Yes (Signal peptide)	X
PAM93078.1	hypothetical	protein B4N84_18985 [Flavobacterium sp. IR1]	9.71e-05	107.417	135.319	1.25975	0.333137
PAM93082.1	dihydroorotate	dehydrogenase (quinone) [Flavobacterium sp. IR1]	0.000789628	23.3133	10.3145	0.442431	-1.17648	0.08	Other
PAM93083.1	peptidase	T [Flavobacterium sp. IR1]	8.61e-07	1283.79	576.77	0.44927	-1.15434	0.07	Other
PAM93086.1	preprotein	translocase subunit YajC [Flavobacterium sp. IR1]	0.0124645	39.9637	36.6726	0.917648	-0.123987
PAM93087.1	leucine	dehydrogenase [Flavobacterium sp. IR1]	0.351248	1289.99	1302.36	1.00959	0.0137649
PAM93089.1	lipase	[Flavobacterium sp. IR1]	1.43e-08	2242.07	3506.3	1.56387	0.645118
PAM93094.1	cytochrome	C [Flavobacterium sp. IR1]	0.0412991	1.42873	2.45678	1.71956	0.782041
PAM93095.1	peptidylprolyl	isomerase [Flavobacterium sp. IR1]	0.144644	54.8832	46.1246	0.840414	-0.250828
PAM93097.1	cupin	[Flavobacterium sp. IR1]	0.00575376	27.5867	35.3649	1.28196	0.358348
PAM93098.1	hypothetical	protein B4N84_19100 [Flavobacterium sp. IR1]	5.72e-07	65.3076	30.454	0.466317	-1.10062	0.95	Yes (Lipoprotein signal peptide)	X
PAM93100.1;WP_055098496.1	50S;MULTISPECIES:	ribosomal protein L19 [Flavobacterium sp. IR1];50S ribosomal protein L19 [Flavobacterium]	0.0415701	453.417	503.725	1.11095	0.151796
PAM93101.1	isocitrate	dehydrogenase (NADP(+)) [Flavobacterium sp. IR1]	0.006107	2406.69	1623.71	0.674664	-0.567759
PAM93103.1	DinB	superfamily protein [Flavobacterium sp. IR1]	0.00146904	105.888	44.8041	0.423128	-1.24083	0.06	OTher
PAM93108.1	hypothetical	protein B4N84_19150 [Flavobacterium sp. IR1]	0.88364	318.054	235.746	0.741213	-0.43204
PAM93110.1	hypothetical	protein B4N84_19160 [Flavobacterium sp. IR1]	0.00313014	34.0925	16.8182	0.493311	-1.01943	0.9	Other	X
PAM93113.1	ADP-forming	succinate--CoA ligase subunit beta [Flavobacterium sp. IR1]	0.000943685	843.389	604.869	0.717188	-0.479577
PAM93115.1	diaminopimelate	decarboxylase [Flavobacterium sp. IR1]	6.27e-06	16.223	54.351	3.35024	1.74427	0.22	Other
PAM93117.1	hypothetical	protein B4N84_19205 [Flavobacterium sp. IR1]	0.0138205	98.1873	82.4348	0.839567	-0.252283
PAM93126.1	hypothetical	protein B4N84_19260 [Flavobacterium sp. IR1]	0.00349174	23.472	32.1324	1.36897	0.453086
PAM93128.1	GNAT	family N-acetyltransferase [Flavobacterium sp. IR1]	0.13327	37.5301	34.4373	0.917593	-0.124074
PAM93132.1	oxidoreductase	[Flavobacterium sp. IR1]	0.000970875	87.4164	158.573	1.81399	0.85917
PAM93134.1	thiol:disulfide	interchange protein [Flavobacterium sp. IR1]	0.000370502	36.6998	19.5861	0.533683	-0.905945
PAM93138.1	dihydrolipoyl	dehydrogenase [Flavobacterium sp. IR1]	0.0208387	781.17	514.702	0.658886	-0.6019
PAM93140.1	DUF695	domain-containing protein [Flavobacterium sp. IR1]	0.057493	42.7038	79.4054	1.85945	0.894874
PAM93152.1	anhydro-N-acetylmuramic	acid kinase [Flavobacterium sp. IR1]	8.17e-06	93.412	37.4848	0.401285	-1.3173	0.06	Other
PAM93153.1	glycosyl	hydrolase [Flavobacterium sp. IR1]	2.19e-06	49.6915	86.5874	1.7425	0.801158
PAM93157.1	alkyl	hydroperoxide reductase [Flavobacterium sp. IR1]	2.41e-08	36.8804	72.6065	1.9687	0.977243
PAM93162.1	cell	division protein FtsK [Flavobacterium sp. IR1]	2.59e-06	75.696	11.9592	0.15799	-2.6621	0.05	Other
PAM93163.1	3,4-dihydroxy-2-butanone-4-phosphate	synthase [Flavobacterium sp. IR1]	0.00683116	227.24	146.614	0.645196	-0.63219
PAM93168.1	hypothetical	protein B4N84_19510 [Flavobacterium sp. IR1]	0.0256758	765.743	420.637	0.549319	-0.864285
PAM93172.1	hybrid	sensor histidine kinase/response regulator [Flavobacterium sp. IR1]	6.49e-07	44.417	143.043	3.22046	1.68727	0.4	Yes (Signal peptide)	Signaling
PAM93175.1	hypothetical	protein B4N84_19550 [Flavobacterium sp. IR1]	1.8e-07	7.9291	18.4194	2.32302	1.216	0.92	Yes (Lipoprotein signal peptide)	X
PAM93176.1	1,4-beta-xylanase	[Flavobacterium sp. IR1]	0.116643	19.1446	20.6125	1.07668	0.106584
PAM93182.1	hypothetical	protein B4N84_19585 [Flavobacterium sp. IR1]	0.240139	9.57488	7.53947	0.787421	-0.344792
PAM93189.1	hypothetical	protein B4N84_19625 [Flavobacterium sp. IR1]	1.87e-05	155.413	67.3134	0.433126	-1.20714	0.84	Yes (Lipoprotein signal peptide)	X
PAM93196.1	transcriptional	regulator [Flavobacterium sp. IR1]	0.681036	38.3787	36.506	0.951206	-0.07217
PAM93205.1	SAM-dependent	methyltransferase [Flavobacterium sp. IR1]	2.09e-06	20.4613	31.323	1.53084	0.614325
PAM93207.1	hypothetical	protein B4N84_19725 [Flavobacterium sp. IR1]	9.97e-06	10.4512	28.6362	2.74	1.45418	0.11	Yes (Signal peptide)	Proteolysis
PAM93214.1	SusC/RagA	family TonB-linked outer membrane protein [Flavobacterium sp. IR1]	0.0125307	50.7641	58.7435	1.15719	0.210621
PAM93228.1	hypothetical	protein B4N84_19845 [Flavobacterium sp. IR1]	0.00277853	35.6677	18.0163	0.505115	-0.985317
PAM93233.1	hypothetical	protein B4N84_19870 [Flavobacterium sp. IR1]	0.00125731	162.083	22.2411	0.13722	-2.86543	0.22	Other
PAM93235.1	DUF3276	domain-containing protein [Flavobacterium sp. IR1]	0.000908634	112.536	13.7504	0.122186	-3.03284	0.05	Other
PAM93238.1	glutamate	synthase large subunit [Flavobacterium sp. IR1]	0.657855	19.4349	14.2931	0.735436	-0.443328
PAM93243.1	cystathionine	beta-lyase [Flavobacterium sp. IR1]	0.00401584	7192.29	4845.81	0.673751	-0.569713
PAM93244.1	hypothetical	protein B4N84_19465 [Flavobacterium sp. IR1]	1.77e-05	377.669	409.501	1.08428	0.116743
PAM93245.1	HipA	domain protein [Flavobacterium sp. IR1]	0.0511789	66.9042	89.196	1.33319	0.414883
PAM93247.1	serine	hydrolase [Flavobacterium sp. IR1]	0.0107636	4.13299	6.73952	1.63067	0.705461
PAM93251.1	hypothetical	protein B4N84_19840 [Flavobacterium sp. IR1]	0.116337	121.902	89.1547	0.731365	-0.451336
PAM93272.1	hypothetical	protein B4N84_18620 [Flavobacterium sp. IR1]	0.00800884	25.884	41.7327	1.6123	0.689121
PAM93287.1	RND	transporter [Flavobacterium sp. IR1]	2.58e-06	509.231	131.725	0.258674	-1.9508	0.24	Yes (Lipoprotein signal peptide)	Transport
PAM93288.1	hydrophobe/amphiphile	efflux-1 family RND transporter [Flavobacterium sp. IR1]	0.957225	18.1167	4.56162	0.251791	-1.9897
PAM93291.1	glycosyl	hydrolase [Flavobacterium sp. IR1]	0.000974203	85.679	94.4905	1.10284	0.141228
PAM93293.1	alpha-glucuronidase	[Flavobacterium sp. IR1]	7.16e-05	20.9191	13.71	0.655383	-0.609589
PAM93297.1	alpha-N-arabinofuranosidase	[Flavobacterium sp. IR1]	0.526449	27.3961	29.9062	1.09162	0.126475
PAM93300.1	xylose	isomerase [Flavobacterium sp. IR1]	0.000312582	97.3832	52.293	0.536982	-0.897055
PAM93301.1	fructose-6-phosphate	aldolase [Flavobacterium sp. IR1]	3.78e-05	38.0979	19.3916	0.508995	-0.974277
PAM93302.1	SusC/RagA	family protein [Flavobacterium sp. IR1]	3.15e-07	562.452	321.547	0.571688	-0.806701
PAM93303.1	RagB/SusD	family nutrient uptake outer membrane protein [Flavobacterium sp. IR1]	8.24e-13	1741.12	854.651	0.490861	-1.02661	0.92	Yes (Lipoprotein signal peptide)	Carbohydrate metabolism
PAM93304.1	glycoside	hydrolase 43 family protein [Flavobacterium sp. IR1]	0.0256	90.7965	59.5855	0.656254	-0.607675
PAM93306.1	hypothetical	protein B4N84_18805 [Flavobacterium sp. IR1]	0.000437596	28.2961	6.08192	0.214939	-2.218	0.57	Yes (Signal peptide)	Signaling
PAM93309.1	glycoside	hydrolase [Flavobacterium sp. IR1]	0.0317699	70.3974	96.4158	1.36959	0.453748
PAM93310.1	glycosyl	hydrolase [Flavobacterium sp. IR1]	0.00524121	47.2594	98.3653	2.08139	1.05755	0.74	Yes (Signal peptide)	Carbohydrate metabolism/Starch and sucrose metabolism/Degradation of flavonoids/Cyanoamino acid metabolism
PAM93312.1	SusC/RagA	family TonB-linked outer membrane protein [Flavobacterium sp. IR1]	2.05e-05	175.706	234.262	1.33326	0.414959
PAM93313.1	RagB/SusD	family nutrient uptake outer membrane protein [Flavobacterium sp. IR1]	4.18e-06	842.106	510.407	0.606108	-0.722353
PAM93319.1	mannonate	dehydratase [Flavobacterium sp. IR1]	1.44e-06	59.0104	24.0561	0.407658	-1.29457	0.11	Other
PAM93320.1	alpha-glucosidase	[Flavobacterium sp. IR1]	0.00396473	39.8389	60.2308	1.51186	0.596325
PAM93343.1	hypothetical	protein B4N84_18440, partial [Flavobacterium sp. IR1]	0.253183	142.268	196.94	1.38429	0.469148
PAM93362.1	hypothetical	protein B4N84_17600, partial [Flavobacterium sp. IR1]	0.0187632	13.3248	7.71688	0.579137	-0.788024
PAM93364.1	transcriptional	regulator [Flavobacterium sp. IR1]	0.000327965	510.362	286.074	0.560531	-0.835134
PAM93366.1	proline--tRNA	ligase [Flavobacterium sp. IR1]	1.05e-05	1037.15	297.411	0.286756	-1.8021	0.06	Other
PAM93368.1	transporter	[Flavobacterium sp. IR1]	8.62e-10	1800.81	4582.85	2.54489	1.3476	0.92	Yes (Signal peptide)	Transport
PAM93370.1	hypothetical	protein B4N84_17655 [Flavobacterium sp. IR1]	6.68e-05	46.634	14.5834	0.312722	-1.67705	0.96	Yes (Signal peptide)	X
PAM93371.1	N-acetylmuramoyl-L-alanine	amidase [Flavobacterium sp. IR1]	6.65e-05	109.345	63.8616	0.584037	-0.775869
PAM93377.1	hypothetical	protein B4N84_17690 [Flavobacterium sp. IR1]	8.58e-06	57.8092	24.1335	0.417468	-1.26026	0.9	Yes (Lipoprotein signal peptide)	X
PAM93378.1	RagB/SusD	family nutrient uptake outer membrane protein [Flavobacterium sp. IR1]	0.0441483	34.9997	18.6451	0.532723	-0.908542
PAM93379.1	SusC/RagA	family protein [Flavobacterium sp. IR1]	0.000172694	263.917	134.161	0.508344	-0.976122
PAM93381.1	beta-mannosidase	[Flavobacterium sp. IR1]	0.0694074	5.75437	8.71296	1.51415	0.598504
PAM93383.1	glycosidase	[Flavobacterium sp. IR1]	0.695079	29.1347	41.7644	1.43349	0.519535
PAM93385.1	beta-mannanase	[Flavobacterium sp. IR1]	0.00137282	47.9169	36.0327	0.751982	-0.411229
PAM93386.1	Retaining	alpha-galactosidase [Flavobacterium sp. IR1]	0.0421636	45.9381	42.384	0.922633	-0.116172
PAM93387.1	L-glyceraldehyde	3-phosphate reductase [Flavobacterium sp. IR1]	0.0325512	8.51944	18.2291	2.13971	1.09741
PAM93390.1	beta-glucosidase	[Flavobacterium sp. IR1]	0.00165282	70.9598	50.3387	0.709397	-0.495335
PAM93392.1	GDSL	family lipase [Flavobacterium sp. IR1]	0.00102967	16.993	40.8159	2.40193	1.26419	0.3	Yes (Signal peptide)	Stress response
PAM93393.1	glycoside	hydrolase [Flavobacterium sp. IR1]	7.21e-10	25.5749	67.3923	2.6351	1.39786	0.92	Yes (Signal peptide)	Carbohydrate metabolism
PAM93394.1	hypothetical	protein B4N84_17775 [Flavobacterium sp. IR1]	0.000326688	52.0576	81.2033	1.55987	0.641429
PAM93400.1	bacillithiol	biosynthesis cysteine-adding enzyme BshC [Flavobacterium sp. IR1]	0.00207568	272.511	643.391	2.36097	1.23938	0.26	Other
PAM93402.1;WP_031456090.1	nucleoside-diphosphate;MULTISPECIES:	kinase [Flavobacterium sp. IR1];nucleoside-diphosphate kinase [Flavobacterium]	0.0899499	65.933	77.1936	1.17079	0.22748
PAM93408.1;WP_017495179.1	50S;MULTISPECIES:	ribosomal protein L33 [Flavobacterium sp. IR1];50S ribosomal protein L33 [Flavobacterium]	0.0122131	25.9741	34.4012	1.32444	0.405383
PAM93409.1;WP_008468080.1	50S;MULTISPECIES:	ribosomal protein L28 [Flavobacterium sp. IR1];50S ribosomal protein L28 [Flavobacterium]	0.827404	85.4263	93.3194	1.0924	0.127498
PAM93410.1	damage-inducible	protein CinA [Flavobacterium sp. IR1]	0.0012538	224.084	155.952	0.695955	-0.522935
PAM93412.1	2-hydroxyhepta-2,4-diene-1,7-dioate	isomerase [Flavobacterium sp. IR1]	0.660887	36.4014	35.4201	0.973041	-0.0394268
PAM93414.1	diapophytoene	dehydrogenase [Flavobacterium sp. IR1]	0.0182376	99.303	43.5488	0.438545	-1.1892
PAM93418.1	hypothetical	protein B4N84_17900 [Flavobacterium sp. IR1]	0.827547	3.6083	2.3662	0.655766	-0.608747
PAM93419.1	hypothetical	protein B4N84_17905 [Flavobacterium sp. IR1]	0.0177259	310.262	247.393	0.797369	-0.326681
PAM93420.1	hypothetical	protein B4N84_17910 [Flavobacterium sp. IR1]	1.37e-06	141.636	291.922	2.06108	1.0434	0.77	Yes (Signal peptide)	X
PAM93425.1	hypothetical	protein B4N84_17935 [Flavobacterium sp. IR1]	0.147266	47.3355	52.9849	1.11935	0.162658
PAM93428.1	ABC	transporter ATP-binding protein [Flavobacterium sp. IR1]	0.0847809	19.35	20.6909	1.0693	0.0966609
PAM93429.1	peptidylprolyl	isomerase [Flavobacterium sp. IR1]	1.22e-08	24011.4	3000.26	0.124951	-3.00056	0.94	Yes (Lipoprotein signal peptide)	Protein modification
PAM93431.1	hypothetical	protein B4N84_17970 [Flavobacterium sp. IR1]	0.0237673	5.20405	3.18218	0.61148	-0.709622
PAM93434.1;WP_007138072.1	DUF2795;MULTISPECIES:	domain-containing protein [Flavobacterium sp. IR1];DUF2795 domain-containing protein [Flavobacterium]	5.4e-07	447.333	877.699	1.96207	0.972375
PAM93435.1	preprotein	translocase subunit SecA [Flavobacterium sp. IR1]	9.29e-06	57.5604	126.77	2.20239	1.13907	0.07	Other
PAM93439.1	adenylosuccinate	lyase [Flavobacterium sp. IR1]	0.0167004	274.242	203.24	0.741098	-0.432263
PAM93455.1	hypothetical	protein B4N84_18090 [Flavobacterium sp. IR1]	0.000142032	58.5575	76.1506	1.30044	0.379002
PAM93456.1	peptidase	S9 [Flavobacterium sp. IR1]	0.350988	128.365	115.365	0.898728	-0.154044
PAM93457.1	RNAase	[Flavobacterium sp. IR1]	9.81e-05	103.674	78.9992	0.761994	-0.392148
PAM93458.1	3-ketoacyl-ACP	reductase [Flavobacterium sp. IR1]	0.0180692	169.869	79.0025	0.465078	-1.10446
PAM93459.1	hypothetical	protein B4N84_18110 [Flavobacterium sp. IR1]	0.00872333	51.0846	75.9051	1.48587	0.571308
PAM93470.1	histidine--tRNA	ligase [Flavobacterium sp. IR1]	0.000398274	25.126	27.2653	1.08515	0.117889
PAM93491.1	glyceraldehyde-3-phosphate	dehydrogenase [Flavobacterium sp. IR1]	0.00433929	63.0762	24.3669	0.386309	-1.37217	0.08	Other
PAM93493.1	alanine	dehydrogenase [Flavobacterium sp. IR1]	3.9e-06	102.209	230.015	2.25045	1.17021	0.23	Other
PAM93494.1	alkaline	phosphatase [Flavobacterium sp. IR1]	0.0262766	2695.2	2127.58	0.789396	-0.341178
PAM93497.1	hypothetical	protein B4N84_18120 [Flavobacterium sp. IR1]	0.414578	2363.1	2240.93	0.948302	-0.0765821
PAM93499.1	short-chain	dehydrogenase [Flavobacterium sp. IR1]	0.000174076	296.692	478.897	1.61412	0.690752
PAM93501.1	serine	protease [Flavobacterium sp. IR1]	0.000444977	537.977	304.941	0.56683	-0.819012
PAM93558.1	hypothetical	protein B4N84_17265 [Flavobacterium sp. IR1]	3.68e-06	38.5614	155.776	4.0397	2.01425	0.34	Other
PAM93571.1	iron	ABC transporter ATP-binding protein, partial [Flavobacterium sp. IR1]	0.00170904	29.4311	21.2947	0.723543	-0.46685
PAM93628.1;PAM96086.1	hypothetical	protein B4N84_16885, partial [Flavobacterium sp. IR1];protein B4N84_04165, partial [Flavobacterium sp. IR1]	0.00276453	26.7038	34.8102	1.30357	0.382465
PAM93629.1	hypothetical	protein B4N84_16880, partial [Flavobacterium sp. IR1]	0.23728	8.59018	5.81942	0.67745	-0.561814
PAM93636.1	pectate	lyase [Flavobacterium sp. IR1]	0.0774091	41.7763	29.5718	0.707861	-0.498462
PAM93638.1	glycosyl	hydrolase family 88 [Flavobacterium sp. IR1]	0.00149135	196.867	205.057	1.0416	0.0588028
PAM93639.1	DUF4861	domain-containing protein [Flavobacterium sp. IR1]	0.987316	20.0517	16.8246	0.839063	-0.253149
PAM93641.1	RagB/SusD	family nutrient uptake outer membrane protein [Flavobacterium sp. IR1]	0.00410235	137.097	84.2144	0.614269	-0.703057
PAM93642.1	SusC/RagA	family TonB-linked outer membrane protein [Flavobacterium sp. IR1]	2.25e-07	159.959	197.084	1.23209	0.301107
PAM93643.1	glycoside	hydrolase [Flavobacterium sp. IR1]	0.189505	30.9348	28.1722	0.910699	-0.134954
PAM93644.1	LacI	family transcriptional regulator [Flavobacterium sp. IR1]	0.127556	9.58635	12.3288	1.28607	0.362974
PAM93649.1	glucuronate	isomerase [Flavobacterium sp. IR1]	3.06e-05	104.209	69.1475	0.663545	-0.591734
PAM93651.1	5-dehydro-4-deoxy-D-glucuronate	isomerase [Flavobacterium sp. IR1]	0.0650313	16.7623	9.07923	0.541644	-0.884582
PAM93652.1	alpha/beta	hydrolase [Flavobacterium sp. IR1]	0.00319336	1861.78	1075.81	0.577839	-0.79126
PAM93653.1	hypothetical	protein B4N84_15330 [Flavobacterium sp. IR1]	3.46e-07	29176.2	18134.5	0.62155	-0.686058
PAM93654.1	TonB-dependent	receptor [Flavobacterium sp. IR1]	2.06e-07	59.1373	14.8078	0.250397	-1.99771	0.88	Yes (Signal peptide)	Transport
PAM93660.1	short-chain	dehydrogenase [Flavobacterium sp. IR1]	0.526255	23.1947	20.9673	0.903971	-0.145651
PAM93663.1	transporter	[Flavobacterium sp. IR1]	0.00169797	53.67	88.5473	1.64985	0.722332
PAM93667.1	TetR/AcrR	family transcriptional regulator [Flavobacterium sp. IR1]	0.0055861	43.8887	26.1901	0.596739	-0.744829
PAM93669.1	hypothetical	protein B4N84_15425 [Flavobacterium sp. IR1]	2.72e-10	86.6936	19.4191	0.223997	-2.15845	0.95	Yes (Lipoprotein signal peptide)	X
PAM93679.1	MarR	family transcriptional regulator [Flavobacterium sp. IR1]	7.38e-05	17.1092	64.4114	3.76473	1.91255	0.25	Other
PAM93685.1	magnesium	chelatase [Flavobacterium sp. IR1]	3.5e-05	16.4976	37.3428	2.26353	1.17857	0.06	Other
PAM93691.1	hypothetical	protein B4N84_15545 [Flavobacterium sp. IR1]	0.00516454	25.5928	17.6721	0.69051	-0.534267
PAM93693.1	thiol:disulfide	interchange protein [Flavobacterium sp. IR1]	0.789905	90.3657	97.839	1.0827	0.114634
PAM93694.1	hypothetical	protein B4N84_15560 [Flavobacterium sp. IR1]	0.507724	6.07458	3.51243	0.578218	-0.790315
PAM93697.1	hypothetical	protein B4N84_15585 [Flavobacterium sp. IR1]	2.67e-12	1657.3	4471.76	2.69821	1.432	0.94	Yes (Signal peptide)	X
PAM93698.1	hypothetical	protein B4N84_15590 [Flavobacterium sp. IR1]	7.18e-05	598.068	751.869	1.25716	0.330171
PAM93699.1	hypothetical	protein B4N84_15595 [Flavobacterium sp. IR1]	0.00240148	169.826	315.105	1.85545	0.89177
PAM93700.1	hypothetical	protein B4N84_15600 [Flavobacterium sp. IR1]	4.44e-07	1356.12	5307.39	3.91365	1.96851	0.88	Other	X
PAM93701.1	hypothetical	protein B4N84_15605 [Flavobacterium sp. IR1]	0.790375	123.098	112.122	0.91084	-0.13473
PAM93702.1	hypothetical	protein B4N84_15610 [Flavobacterium sp. IR1]	6.35e-09	412.165	1167.54	2.83271	1.50218	0.94	Yes (Signal peptide)	X
PAM93711.1	prepilin-type	cleavage/methylation domain-containing protein [Flavobacterium sp. IR1]	0.000557227	11.7723	20.6165	1.75127	0.8084
PAM93713.1	type	II and III secretion system protein [Flavobacterium sp. IR1]	4.16e-08	899.14	2058.74	2.28967	1.19514	0.31	Yes (Signal peptide)	Transport
PAM93716.1	hypothetical	protein B4N84_15685 [Flavobacterium sp. IR1]	7.31e-05	695.691	1310.53	1.88378	0.913632
PAM93736.1	NADP-dependent	malic enzyme [Flavobacterium sp. IR1]	0.00241671	587.528	350.724	0.596948	-0.744322
PAM93740.1	hypothetical	protein B4N84_15805 [Flavobacterium sp. IR1]	3.3e-06	36.4009	73.5427	2.02035	1.01461	0.44	Yes (Signal peptide)	X
PAM93744.1	hypothetical	protein B4N84_15825 [Flavobacterium sp. IR1]	0.000107687	8.15591	23.571	2.89004	1.53109	0.56	Yes (Signal peptide)	X
PAM93745.1	cystathionine	beta-lyase [Flavobacterium sp. IR1]	1.63e-06	37.8153	74.8932	1.9805	0.985865
PAM93752.1	hypothetical	protein B4N84_15870 [Flavobacterium sp. IR1]	0.0134048	34.2334	52.9854	1.54777	0.630192
PAM93754.1	aldehyde	dehydrogenase [Flavobacterium sp. IR1]	0.0139122	49.9753	33.291	0.666149	-0.586083
PAM93757.1	alpha/beta	hydrolase [Flavobacterium sp. IR1]	0.00313974	22.8856	25.271	1.10423	0.143044
PAM93760.1	LLM	class flavin-dependent oxidoreductase [Flavobacterium sp. IR1]	0.188526	34.7591	33.2831	0.957534	-0.0626042
PAM93761.1	peptidase	[Flavobacterium sp. IR1]	5.44e-07	101.489	467.371	4.60512	2.20324	0.95	Yes (Lipoprotein signal peptide)	Proteolysis
PAM93762.1	secretion	protein [Flavobacterium sp. IR1]	2.21e-05	54.5973	134.051	2.45527	1.29588	0.74	Yes (Signal peptide)	Proteolysis
PAM93783.1	hypothetical	protein B4N84_16040 [Flavobacterium sp. IR1]	5.79e-08	305.486	404.679	1.3247	0.405671
PAM93805.1	SusD/RagB	family nutrient-binding outer membrane lipoprotein [Flavobacterium sp. IR1]	2.19e-07	405.619	264.481	0.652043	-0.616961
PAM93806.1	SusC/RagA	family TonB-linked outer membrane protein [Flavobacterium sp. IR1]	0.198432	45.3971	41.8491	0.921845	-0.117404
PAM93807.1	DUF541	domain-containing protein [Flavobacterium sp. IR1]	3.23e-05	971.984	1311.1	1.34889	0.431768
PAM93809.1	phosphoglucosamine	mutase [Flavobacterium sp. IR1]	0.00498916	327.222	388.704	1.18789	0.248402
PAM93811.1	gamma-glutamyltransferase	[Flavobacterium sp. IR1]	1.64e-06	324.919	465.442	1.43249	0.518522
PAM93817.1	TIGR00730	family Rossman fold protein [Flavobacterium sp. IR1]	2.23e-08	606.5	211.241	0.348295	-1.52162	0.05	Other
PAM93818.1	transketolase	[Flavobacterium sp. IR1]	0.39193	458.985	448.093	0.976269	-0.0346487
PAM93821.1	hypothetical	protein B4N84_16240 [Flavobacterium sp. IR1]	0.755016	148.021	49.3245	0.333227	-1.58542
PAM93827.1	2-dehydropantoate	2-reductase [Flavobacterium sp. IR1]	0.0905839	161.99	123.073	0.759758	-0.396387
PAM93833.1	hypothetical	protein B4N84_16305 [Flavobacterium sp. IR1]	0.000126021	18.9169	11.3477	0.599867	-0.737284
PAM93841.1	transporter	[Flavobacterium sp. IR1]	0.00164322	32.498	40.1238	1.23465	0.304106
PAM93846.1	exopolyphosphatase	[Flavobacterium sp. IR1]	0.143683	6.80399	3.39933	0.499609	-1.00113
PAM93849.1	hypothetical	protein B4N84_16390 [Flavobacterium sp. IR1]	0.145338	134.349	119.843	0.892032	-0.164832
PAM93851.1	ribonuclease	Z [Flavobacterium sp. IR1]	0.00386202	159.25	106.328	0.667681	-0.582768
PAM93854.1	hypothetical	protein B4N84_16415 [Flavobacterium sp. IR1]	5.99e-06	5.57356	11.3304	2.03288	1.02352	0.08	Other
PAM93855.1	bifunctional	pyr operon transcriptional regulator/uracil phosphoribosyltransferase [Flavobacterium sp. IR1]	0.00277759	74.6592	107.012	1.43334	0.519379
PAM93856.1	hypothetical	protein B4N84_16425 [Flavobacterium sp. IR1]	0.00294822	52.7629	38.7695	0.734787	-0.444603
PAM93858.1	redoxin	[Flavobacterium sp. IR1]	0.011651	436.611	487.187	1.11584	0.158127
PAM93863.1	glycoside	hydrolase [Flavobacterium sp. IR1]	2.97e-05	43.7546	234.881	5.36813	2.42442	0.95	Yes (Signal peptide)	Carbohydrate metabolism
PAM93866.1	SusD/RagB	family nutrient-binding outer membrane lipoprotein [Flavobacterium sp. IR1]	1.75e-09	128.044	236.402	1.84627	0.884611
PAM93867.1	SusC/RagA	family TonB-linked outer membrane protein [Flavobacterium sp. IR1]	4.84e-07	50.3063	88.8688	1.76655	0.820938
PAM93871.1;WP_095383453.1	fructose-6-phosphate;MULTISPECIES:	aldolase [Flavobacterium sp. IR1];fructose-6-phosphate aldolase [Flavobacterium]	3.18e-06	499.542	173.098	0.346512	-1.52902	0.06	Other
PAM93873.1	glutamine	cyclotransferase [Flavobacterium sp. IR1]	3.11e-07	123.471	27.2175	0.220436	-2.18157	0.79	Yes (Lipoprotein signal peptide)	Protein modification
PAM93874.1	imidazolonepropionase	[Flavobacterium sp. IR1]	0.00457533	31.7487	53.4427	1.6833	0.751295
PAM93876.1	hypothetical	protein B4N84_16530 [Flavobacterium sp. IR1]	1.65e-07	4239.36	1252.21	0.295377	-1.75937	0.94	Other	X
PAM93877.1	arginase	[Flavobacterium sp. IR1]	8.75e-05	19.7475	10.7051	0.5421	-0.883369		Other
PAM93881.1	chorismate	synthase [Flavobacterium sp. IR1]	0.324908	32.6718	27.6773	0.84713	-0.239344
PAM93883.1	hypothetical	protein B4N84_16565 [Flavobacterium sp. IR1]	1.5e-06	37.4456	75.4664	2.01536	1.01104	0.37	Yes (Signal peptide)	X
PAM93884.1	hypothetical	protein B4N84_16570 [Flavobacterium sp. IR1]	0.884808	146.849	157.704	1.07392	0.102888
PAM93889.1	organic	solvent ABC transporter substrate-binding protein [Flavobacterium sp. IR1]	0.00128391	212.126	274.742	1.29518	0.373156
PAM93890.1	organic	solvent tolerance protein OstA [Flavobacterium sp. IR1]	2.01e-06	151.535	96.6988	0.638129	-0.648079
PAM93892.1	methylglyoxal	synthase [Flavobacterium sp. IR1]	0.479	17.4939	19.2636	1.10116	0.139025
PAM93893.1	N-acetylglucosamine	kinase [Flavobacterium sp. IR1]	0.0957987	195.874	147.207	0.751536	-0.412085
PAM93894.1	type	I glyceraldehyde-3-phosphate dehydrogenase [Flavobacterium sp. IR1]	0.927736	12.785	11.3226	0.885617	-0.175246
PAM93895.1	6-phosphofructokinase	[Flavobacterium sp. IR1]	0.0102411	265.492	362.69	1.3661	0.450068
PAM93900.1	zinc	metalloprotease [Flavobacterium sp. IR1]	7.8e-09	7.12188	34.8923	4.89931	2.29258	0.95	Yes (Lipoprotein signal peptide)	Proteolysis
PAM93904.1	hypothetical	protein B4N84_16680 [Flavobacterium sp. IR1]	8.7e-05	19.73	15.3205	0.776507	-0.364929
PAM93905.1	peptidase	M15 [Flavobacterium sp. IR1]	0.00591581	209.809	312.091	1.4875	0.57289
PAM93907.1	TonB-dependent	siderophore receptor [Flavobacterium sp. IR1]	2.47e-07	1409.56	746.635	0.529694	-0.91677
PAM93929.1	molybdate	ABC transporter substrate-binding protein [Flavobacterium sp. IR1]	0.312146	45.3625	32.8683	0.724569	-0.464804
PAM93945.1	hypothetical	protein B4N84_15910 [Flavobacterium sp. IR1]	0.00434327	27.8424	46.1339	1.65696	0.728542
PAM93946.1	hypothetical	protein B4N84_16005 [Flavobacterium sp. IR1]	3.25e-05	133.662	261.787	1.95858	0.96981
PAM93948.1	aminopeptidase	[Flavobacterium sp. IR1]	0.396454	76.7802	71.6665	0.933398	-0.099435
PAM93950.1	N-acetylmuramoyl-L-alanine	amidase [Flavobacterium sp. IR1]	0.928242	36.5271	27.7342	0.759276	-0.397303
PAM93953.1	molybdopterin-binding	protein [Flavobacterium sp. IR1]	2.3e-06	32.3581	184.965	5.71619	2.51505	0.06	Yes (Signal peptide)	X
PAM93962.1	hypothetical	protein B4N84_15170, partial [Flavobacterium sp. IR1]	5.01e-06	21.3922	101.25	4.73302	2.24276	0.95	Other	X
PAM93968.1	hypothetical	protein B4N84_15140, partial [Flavobacterium sp. IR1]	0.106758	17.4528	24.3148	1.39317	0.47837
PAM93971.1	threonine--tRNA	ligase [Flavobacterium sp. IR1]	8.55e-05	245.338	145.879	0.594605	-0.749996
PAM93972.1;WP_217427714.1	translation;MULTISPECIES:	initiation factor IF-3 [Flavobacterium sp. IR1];translation initiation factor IF-3 [Flavobacterium]	3.7e-06	135.236	229.82	1.6994	0.765022
PAM93974.1;WP_017498429.1	50S;MULTISPECIES:	ribosomal protein L20 [Flavobacterium sp. IR1];50S ribosomal protein L20 [Flavobacterium]	0.000216199	46.6922	118.709	2.54237	1.34617	0.59	Other
PAM93981.1	asparagine	synthetase B [Flavobacterium sp. IR1]	3.88e-07	219.331	684.972	3.12301	1.64294	0.14	Yes (Signal peptide)	Stress response
PAM93982.1	DNA-binding	response regulator [Flavobacterium sp. IR1]	0.230286	9.44276	7.39808	0.783466	-0.352057
PAM93985.1	hypothetical	protein B4N84_12910 [Flavobacterium sp. IR1]	4.36e-07	76.7113	177.207	2.31005	1.20792	0.6	Other	X
PAM93987.1	acetyl-CoA	carboxylase carboxyltransferase subunit alpha [Flavobacterium sp. IR1]	0.0636528	84.0584	84.2018	1.00171	0.00245899
PAM93995.1	transketolase	[Flavobacterium sp. IR1]	2.43e-05	63.3209	41.6331	0.657494	-0.60495
PAM93996.1	hypothetical	protein B4N84_12975 [Flavobacterium sp. IR1]	0.00118964	11601.3	12241.1	1.05514	0.0774409
PAM94009.1	hypothetical	protein B4N84_13060 [Flavobacterium sp. IR1]	7.2e-13	383.428	43.8228	0.114292	-3.1292	0.96	Other	LPS assembly
PAM94018.1	heat-shock	protein [Flavobacterium sp. IR1]	0.406636	37.6548	34.9381	0.927853	-0.108032
PAM94021.1	VOC	family protein [Flavobacterium sp. IR1]	0.408672	19.8083	13.3548	0.6742	-0.568752
PAM94022.1	acyl-CoA	thioesterase [Flavobacterium sp. IR1]	0.240409	9.3139	8.54326	0.917259	-0.124598
PAM94024.1	hypothetical	protein B4N84_13135 [Flavobacterium sp. IR1]	0.246578	322.611	318.915	0.988545	-0.0166209
PAM94029.1	endonuclease	[Flavobacterium sp. IR1]	1.78e-09	1015	2123.17	2.09178	1.06473	0.95	Yes (Signal peptide)	X
PAM94030.1	short-chain	dehydrogenase [Flavobacterium sp. IR1]	0.194085	196.831	165.735	0.842013	-0.248086
PAM94036.1	ABC	transporter substrate-binding protein [Flavobacterium sp. IR1]	0.0613739	33.0277	43.2317	1.30895	0.388414
PAM94038.1	TonB-dependent	receptor [Flavobacterium sp. IR1]	0.789359	383.874	318.606	0.829975	-0.26886
PAM94039.1	hypothetical	protein B4N84_13210 [Flavobacterium sp. IR1]	1.74e-08	27885.4	56797.8	2.03683	1.02632	0.87	Yes (Lipoprotein signal peptide)	X
PAM94040.1	peptidase	S41 [Flavobacterium sp. IR1]	1.8e-05	1411.36	1631.49	1.15597	0.209104
PAM94044.1	hypothetical	protein B4N84_13240 [Flavobacterium sp. IR1]	4.7e-08	101.207	263.684	2.6054	1.3815	0.59	Yes (Signal peptide)	Proteolysis
PAM94046.1	carbamoyl	phosphate synthase large subunit [Flavobacterium sp. IR1]	0.0105168	105.274	79.999	0.759912	-0.396096
PAM94050.1	anion	permease [Flavobacterium sp. IR1]	9.69e-07	16.2387	85.5094	5.26577	2.39664	0.1	Other
PAM94053.1	hypothetical	protein B4N84_13290 [Flavobacterium sp. IR1]	2.58e-06	3307.78	5019.82	1.51758	0.601772
PAM94054.1	glucose-1-phosphate	thymidylyltransferase [Flavobacterium sp. IR1]	0.00469885	935.563	690.857	0.73844	-0.437448
PAM94060.1	type	B 50S ribosomal protein L31 [Flavobacterium sp. IR1]	0.00293135	9.34746	18.2353	1.95083	0.964087
PAM94061.1	DUF4199	domain-containing protein [Flavobacterium sp. IR1]	0.196383	281.567	216.919	0.770401	-0.376318
PAM94063.1	phosphoglucomutase	[Flavobacterium sp. IR1]	0.0499455	76.081	82.4813	1.08413	0.116532
PAM94064.1	antibiotic	ABC transporter ATP-binding protein [Flavobacterium sp. IR1]	0.0697952	6.64118	20.4641	3.08139	1.62358
PAM94066.1	hypothetical	protein B4N84_13360 [Flavobacterium sp. IR1]	3e-05	32.8976	16.265	0.494413	-1.01621	0.91	Yes (Lipoprotein signal peptide)	X
PAM94068.1	TonB-dependent	receptor [Flavobacterium sp. IR1]	3.25e-05	26.266	42.3137	1.61096	0.687924
PAM94070.1	cell	division protein ZapA [Flavobacterium sp. IR1]	0.734658	31.3141	27.7977	0.887706	-0.171847
PAM94074.1	hypothetical	protein B4N84_13405 [Flavobacterium sp. IR1]	6.05e-07	924.901	1703.41	1.84172	0.881054
PAM94075.1	hypothetical	protein B4N84_13410 [Flavobacterium sp. IR1]	5.92e-07	5184.8	9636.6	1.85863	0.894237
PAM94077.1	hypothetical	protein B4N84_13420 [Flavobacterium sp. IR1]	1.47e-07	60.8928	20.7195	0.340263	-1.55528	0.72	Yes (Signal peptide)	Transport
PAM94079.1	UDP-N-acetylglucosamine	1-carboxyvinyltransferase [Flavobacterium sp. IR1]	6.73e-07	185.532	89.9849	0.48501	-1.04391	0.04	Other
PAM94080.1	hypothetical	protein B4N84_13435 [Flavobacterium sp. IR1]	0.0267814	40.5843	52.7708	1.30027	0.378816		Other
PAM94081.1	hypothetical	protein B4N84_13440 [Flavobacterium sp. IR1]	0.118645	150.882	95.4811	0.632819	-0.660136
PAM94082.1	esterase	[Flavobacterium sp. IR1]	0.00523188	32.6632	20.99	0.642618	-0.637966
PAM94085.1	methionyl-tRNA	formyltransferase [Flavobacterium sp. IR1]	0.0348806	288.733	217.422	0.75302	-0.409239
PAM94086.1	hypothetical	protein B4N84_13465 [Flavobacterium sp. IR1]	0.00375508	19.2717	57.733	2.99574	1.58291	0.53	Yes (Signal peptide)	X
PAM94087.1	hypothetical	protein B4N84_13470 [Flavobacterium sp. IR1]	1.3e-06	41.9965	122.379	2.91402	1.54301	0.83	Yes (Signal peptide)	X
PAM94088.1	hypothetical	protein B4N84_13475 [Flavobacterium sp. IR1]	0.107474	9.25772	22.7964	2.46242	1.30008
PAM94091.1	hypothetical	protein B4N84_13490 [Flavobacterium sp. IR1]	0.153548	55.0773	61.6321	1.11901	0.162224
PAM94094.1;WP_012022249.1	HU;MULTISPECIES:	family DNA-binding protein [Flavobacterium sp. IR1];HU family DNA-binding protein [Flavobacterium]	0.00536417	681.495	1745.99	2.562	1.35727	0.59	Other
PAM94099.1	transcriptional	regulator [Flavobacterium sp. IR1]	0.0825186	24.7706	18.9512	0.765065	-0.386345
PAM94109.1	DUF5123	domain-containing protein [Flavobacterium sp. IR1]	0.0401029	276.353	285.821	1.03426	0.0485993
PAM94110.1	RagB/SusD	family nutrient uptake outer membrane protein [Flavobacterium sp. IR1]	2.01e-05	113.778	76.889	0.675784	-0.565366
PAM94111.1	SusC/RagA	family protein [Flavobacterium sp. IR1]	1.84e-08	218.376	376.995	1.72636	0.787731
PAM94125.1	thioredoxin-disulfide	reductase [Flavobacterium sp. IR1]	8.69e-05	215.198	70.7601	0.328814	-1.60466	0.13	Other
PAM94128.1	hypothetical	protein B4N84_13700 [Flavobacterium sp. IR1]	0.000141863	42.2508	25.886	0.612676	-0.706804
PAM94129.1	4-hydroxy-tetrahydrodipicolinate	reductase [Flavobacterium sp. IR1]	0.00368188	273.775	175.323	0.640391	-0.642974
PAM94130.1	signal	peptidase I [Flavobacterium sp. IR1]	0.000198009	197.406	88.6677	0.449165	-1.15468	0.14	Other
PAM94135.1	tetratricopeptide	repeat protein [Flavobacterium sp. IR1]	3.13e-06	31.1431	46.6625	1.49832	0.58335
PAM94139.1	aminotransferase	class I/II [Flavobacterium sp. IR1]	0.605724	47.7584	46.0029	0.963242	-0.0540303
PAM94144.1	RNA	polymerase subunit sigma-70 [Flavobacterium sp. IR1]	0.00302005	51.5185	27.002	0.524121	-0.932028
PAM94151.1	type	I glyceraldehyde-3-phosphate dehydrogenase [Flavobacterium sp. IR1]	0.216009	43.6791	42.5898	0.975063	-0.0364327
PAM94155.1	Nif3-like	dinuclear metal center hexameric protein [Flavobacterium sp. IR1]	1.08e-06	63.3088	12.3176	0.194563	-2.36169	0.05	Other
PAM94166.1	hypothetical	protein B4N84_13910 [Flavobacterium sp. IR1]	3.22e-06	270.794	339.947	1.25537	0.328114
PAM94171.1	bifunctional	5,10-methylene-tetrahydrofolate dehydrogenase/5,10-methylene-tetrahydrofolate cyclohydrolase [Flavobacterium sp. IR1]	1.6e-05	149.263	23.1615	0.155173	-2.68805	0.07	Other
PAM94172.1	signal	recognition particle protein [Flavobacterium sp. IR1]	0.801908	11.8507	10.7144	0.904118	-0.145417
PAM94174.1	peptidoglycan-binding	protein [Flavobacterium sp. IR1]	0.0299149	30.0935	23.8509	0.792561	-0.335406
PAM94176.1	hypothetical	protein B4N84_13960 [Flavobacterium sp. IR1]	4.87e-05	12668.6	6703.85	0.529171	-0.918193
PAM94177.1;PAM94471.1	TonB-dependent	receptor [Flavobacterium sp. IR1];receptor, partial [Flavobacterium sp. IR1]	0.0307566	56.8744	46.5488	0.818451	-0.289033
PAM94178.1	hypothetical	protein B4N84_13970 [Flavobacterium sp. IR1]	2.33e-06	1173.62	592.919	0.505203	-0.985065
PAM94179.1	hypothetical	protein B4N84_13975 [Flavobacterium sp. IR1]	6.76e-07	46.9233	82.6643	1.76169	0.816961
PAM94180.1	arginine--tRNA	ligase [Flavobacterium sp. IR1]	0.0032622	56.204	36.66	0.652267	-0.616465
PAM94181.1	copper	homeostasis protein [Flavobacterium sp. IR1]	0.000792384	27.7397	13.9884	0.504273	-0.987723
PAM94182.1;WP_065450948.1	ketoacyl-ACP;MULTISPECIES:	synthase III [Flavobacterium sp. IR1];ketoacyl-ACP synthase III [Flavobacterium]	0.589562	66.9538	63.5761	0.949552	-0.0746817
PAM94184.1	hypothetical	protein B4N84_14010 [Flavobacterium sp. IR1]	0.0402199	1114.72	952.064	0.854083	-0.227553
PAM94185.1	hypothetical	protein B4N84_14015 [Flavobacterium sp. IR1]	0.0950077	466.603	518.464	1.11115	0.152049
PAM94186.1	molecular	chaperone HtpG [Flavobacterium sp. IR1]	1.74e-05	286.458	190.204	0.663988	-0.59077
PAM94195.1	mannose-6-phosphate	isomerase [Flavobacterium sp. IR1]	0.231501	321.602	276.366	0.85934	-0.218699
PAM94196.1	peroxiredoxin	[Flavobacterium sp. IR1]	0.0718655	95.8244	75.6399	0.789359	-0.341246
PAM94198.1	isopentenyl-diphosphate	delta-isomerase [Flavobacterium sp. IR1]	0.0158301	58.4521	73.4916	1.25729	0.330323
PAM94200.1	peptide-methionine	(S)-S-oxide reductase [Flavobacterium sp. IR1]	0.000280973	13.9942	6.96263	0.497537	-1.00713	0.94	Yes (Signal peptide)	Stress response
PAM94201.1	Xaa-Pro	aminopeptidase [Flavobacterium sp. IR1]	3.08e-08	682.759	1387.08	2.03158	1.0226	0.06	Yes (Signal peptide)	Proteolysis
PAM94204.1	FAD-binding	protein [Flavobacterium sp. IR1]	0.274188	6.52322	2.67911	0.410704	-1.28383
PAM94206.1	DNA	helicase RecQ [Flavobacterium sp. IR1]	0.000171343	180.886	83.7568	0.463035	-1.11081	0.17	Other
PAM94213.1	sugar	transferase [Flavobacterium sp. IR1]	0.148329	13.9839	13.7398	0.982541	-0.0254102
PAM94241.1	glucose-1-phosphate	thymidylyltransferase [Flavobacterium sp. IR1]	0.0326267	138.491	98.9507	0.71449	-0.485014
PAM94242.1	dTDP-4-dehydrorhamnose	reductase [Flavobacterium sp. IR1]	0.000136371	927.064	356.168	0.384189	-1.38011	0.06	Other
PAM94243.1	dTDP-4-dehydrorhamnose	3,5-epimerase [Flavobacterium sp. IR1]	0.00177607	162.901	41.3603	0.253898	-1.97768	0.15	Other
PAM94253.1	hypothetical	protein B4N84_14390 [Flavobacterium sp. IR1]	0.67821	15.6618	19.768	1.26217	0.33591
PAM94257.1	sugar	transporter [Flavobacterium sp. IR1]	0.023143	508.665	452.791	0.890156	-0.16787
PAM94258.1	dTDP-glucose	4,6-dehydratase [Flavobacterium sp. IR1]	0.232579	362.573	262.102	0.722895	-0.468142
PAM94263.1	LPS	biosynthesis protein WbpP [Flavobacterium sp. IR1]	0.239287	30.9255	12.7071	0.410893	-1.28317
PAM94265.1	sugar	transporter [Flavobacterium sp. IR1]	0.00665251	35.964	22.9398	0.637854	-0.648701
PAM94267.1	CoA-binding	protein [Flavobacterium sp. IR1]	0.575887	6.31079	5.87917	0.931605	-0.102209
PAM94270.1	amidinotransferase	[Flavobacterium sp. IR1]	0.0338874	63.0419	62.3888	0.98964	-0.0150241
PAM94271.1	citrate	(Si)-synthase [Flavobacterium sp. IR1]	0.354129	3942.03	3840.5	0.974244	-0.0376457
PAM94272.1	phosphopyruvate	hydratase [Flavobacterium sp. IR1]	1.14e-05	62.7721	109.419	1.74312	0.801668
PAM94273.1	carbamoyl	phosphate synthase small subunit [Flavobacterium sp. IR1]	0.0177461	38.1072	41.7385	1.09529	0.131317
PAM94274.1;WP_029272056.1	50S;MULTISPECIES:	ribosomal protein L17 [Flavobacterium sp. IR1];50S ribosomal protein L17 [Flavobacterium]	2.39e-08	1102.54	3490.87	3.16619	1.66275	0.57	Other
PAM94275.1;WP_026109818.1	DNA-directed;MULTISPECIES:	RNA polymerase subunit alpha [Flavobacterium sp. IR1];DNA-directed RNA polymerase subunit alpha [Flavobacterium]	0.000417427	238.311	259.154	1.08746	0.120964
PAM94276.1;WP_026982953.1	30S;MULTISPECIES:	ribosomal protein S4 [Flavobacterium sp. IR1];30S ribosomal protein S4 [Flavobacterium]	0.0991556	46.365	50.9078	1.09798	0.134851
PAM94277.1;WP_007803677.1	30S;MULTISPECIES:	ribosomal protein S11 [Flavobacterium sp. IR1];30S ribosomal protein S11 [Flavobacterium]	0.00256861	58.7537	84.6892	1.44143	0.527497
PAM94278.1;WP_007803675.1	30S;MULTISPECIES:	ribosomal protein S13 [Flavobacterium sp. IR1];30S ribosomal protein S13 [Flavobacterium]	0.0186165	196.996	271.36	1.37749	0.462045
PAM94280.1;WP_007136545.1	translation;MULTISPECIES:	initiation factor IF-1 [Flavobacterium sp. IR1];translation initiation factor IF-1 [Flavobacteriaceae]	8.32e-06	253.416	51.5883	0.203571	-2.29639	0.05	Other
PAM94281.1	preprotein	translocase subunit SecY [Flavobacterium sp. IR1]	0.0991932	8.59056	13.4251	1.56277	0.644107
PAM94282.1;WP_017495009.1	50S;MULTISPECIES:	ribosomal protein L15 [Flavobacterium sp. IR1];50S ribosomal protein L15 [Flavobacterium]	0.000629423	26.5139	83.5527	3.15128	1.65594	0.59	Other
PAM94283.1;WP_017495010.1	50S;MULTISPECIES:	ribosomal protein L30 [Flavobacterium sp. IR1];50S ribosomal protein L30 [Flavobacterium]	3.3e-05	70.7252	333.31	4.71274	2.23657	0.15	Other
PAM94284.1;WP_085950926.1	30S;MULTISPECIES:	ribosomal protein S5 [Flavobacterium sp. IR1];30S ribosomal protein S5 [Flavobacterium]	0.378048	9.31065	6.85839	0.736617	-0.441012
PAM94285.1;WP_017495012.1	50S;MULTISPECIES:	ribosomal protein L18 [Flavobacterium sp. IR1];50S ribosomal protein L18 [Flavobacterium]	7.71e-07	142.515	315.865	2.21637	1.1482	0.21	Other
PAM94286.1	50S	ribosomal protein L6 [Flavobacterium sp. IR1]	0.016371	411.119	460.962	1.12124	0.165093
PAM94287.1;WP_007803655.1	30S;MULTISPECIES:	ribosomal protein S14 [Flavobacterium sp. IR1];30S ribosomal protein S14 [Flavobacterium]	0.847984	134.839	128.071	0.949804	-0.0742988
PAM94288.1;WP_035619635.1	50S;MULTISPECIES:	ribosomal protein L5 [Flavobacterium sp. IR1];50S ribosomal protein L5 [Flavobacterium]	0.000260688	11.2291	15.806	1.4076	0.493238
PAM94290.1;WP_007803649.1	50S;MULTISPECIES:	ribosomal protein L14 [Flavobacterium sp. IR1];50S ribosomal protein L14 [Flavobacterium]	0.166228	2.31267	3.9542	1.7098	0.773827
PAM94292.1;WP_007803639.1	50S;MULTISPECIES:	ribosomal protein L29 [Flavobacterium sp. IR1];50S ribosomal protein L29 [Flavobacterium]	8.84e-05	37.1031	146.107	3.93786	1.97741	0.1	Other
PAM94293.1;WP_007803637.1	50S;MULTISPECIES:	ribosomal protein L16 [Flavobacterium sp. IR1];50S ribosomal protein L16 [Flavobacterium]	0.206989	9.53553	21.608	2.26605	1.18018
PAM94294.1;WP_012022487.1	30S;MULTISPECIES:	ribosomal protein S3 [Flavobacterium sp. IR1];30S ribosomal protein S3 [Flavobacterium]	3.43e-07	201.181	58.708	0.291816	-1.77687	0.17	Other
PAM94295.1;WP_007803631.1	50S;MULTISPECIES:	ribosomal protein L22 [Flavobacterium sp. IR1];50S ribosomal protein L22 [Flavobacterium]	8.04e-06	152.298	232.557	1.52698	0.610684
PAM94296.1;WP_012022488.1	30S;MULTISPECIES:	ribosomal protein S19 [Flavobacterium sp. IR1];30S ribosomal protein S19 [Flavobacterium]	0.000278287	31.8537	25.7042	0.806945	-0.309458
PAM94297.1;WP_007803623.1	50S;MULTISPECIES:	ribosomal protein L2 [Flavobacterium sp. IR1];50S ribosomal protein L2 [Flavobacterium]	0.104174	55.1089	58.7032	1.06522	0.0911542
PAM94298.1;WP_017495018.1	50S;MULTISPECIES:	ribosomal protein L23 [Flavobacterium sp. IR1];50S ribosomal protein L23 [Flavobacterium]	0.0008807	1.94376	3.92901	2.02135	1.01532	0.39	Other
PAM94300.1;WP_007803612.1	50S;MULTISPECIES:	ribosomal protein L3 [Flavobacterium sp. IR1];50S ribosomal protein L3 [Flavobacterium]	0.00765496	35.738	57.2296	1.60136	0.679301
PAM94301.1;WP_007803605.1	30S;MULTISPECIES:	ribosomal protein S10 [Flavobacterium sp. IR1];30S ribosomal protein S10 [Flavobacterium]	6.23e-07	77.208	150.636	1.95105	0.964248
PAM94302.1	elongation	factor G [Flavobacterium sp. IR1]	0.00127982	253.268	173.404	0.684668	-0.546524
PAM94303.1;WP_026727879.1	30S;MULTISPECIES:	ribosomal protein S7 [Flavobacterium sp. IR1];30S ribosomal protein S7 [Flavobacterium]	0.578219	48.651	44.7218	0.919237	-0.121491
PAM94305.1	SusC/RagA	family TonB-linked outer membrane protein [Flavobacterium sp. IR1]	2.17e-06	111118	143563	1.29199	0.369596
PAM94306.1	hypothetical	protein B4N84_14665 [Flavobacterium sp. IR1]	6.43e-06	77091.6	114886	1.49025	0.575556
PAM94309.1	AAA	family ATPase [Flavobacterium sp. IR1]	2.38e-06	19.3625	33.3166	1.72068	0.782976
PAM94310.1	hypothetical	protein B4N84_14685 [Flavobacterium sp. IR1]	0.00896931	117.754	74.0495	0.62885	-0.669212
PAM94313.1	peptidoglycan	synthetase [Flavobacterium sp. IR1]	0.0726416	40.4429	52.482	1.29768	0.375938
PAM94315.1	peptidase	S46 [Flavobacterium sp. IR1]	0.00590702	24128.8	19171	0.794528	-0.331831
PAM94318.1	adenylate	kinase [Flavobacterium sp. IR1]	2.73e-06	123.841	55.7124	0.44987	-1.15242	0.05	Other
PAM94319.1	hypoxanthine	phosphoribosyltransferase [Flavobacterium sp. IR1]	5.74e-05	144.008	238.923	1.6591	0.730397
PAM94320.1	L-sorbosone	dehydrogenase [Flavobacterium sp. IR1]	3.31e-05	454.229	663.64	1.46103	0.546982
PAM94321.1	TonB-dependent	receptor [Flavobacterium sp. IR1]	1.73e-05	7.9561	17.1255	2.1525	1.10602	0.88	Yes (Signal peptide)	Transport
PAM94323.1	5-(carboxyamino)imidazole	ribonucleotide synthase [Flavobacterium sp. IR1]	0.00451385	28.7925	17.6912	0.614438	-0.702661
PAM94324.1	5-(carboxyamino)imidazole	ribonucleotide mutase [Flavobacterium sp. IR1]	5.82e-06	300.24	69.8708	0.232716	-2.10336	0.45	Other
PAM94326.1	peptidase	M3 [Flavobacterium sp. IR1]	4.05e-05	535.561	270.161	0.504446	-0.987229
PAM94328.1	hypothetical	protein B4N84_14775 [Flavobacterium sp. IR1]	0.0823422	36.2214	14.2468	0.393327	-1.3462
PAM94341.1	glycine	dehydrogenase (aminomethyl-transferring) [Flavobacterium sp. IR1]	0.000776145	1436.13	1072.46	0.74677	-0.421264
PAM94342.1	3-oxoacyl-ACP	synthase [Flavobacterium sp. IR1]	0.00653729	81.6699	65.471	0.801654	-0.318948
PAM94343.1	methyltransferase	[Flavobacterium sp. IR1]	0.000190654	19.369	33.8143	1.7458	0.803887
PAM94350.1	peptidase	M28 [Flavobacterium sp. IR1]	0.00204734	397.391	409.457	1.03036	0.0431545
PAM94359.1	acyl-CoA	dehydrogenase [Flavobacterium sp. IR1]	4.28e-07	8894.05	4187.84	0.470859	-1.08663	0.2	Other
PAM94360.1	chalcone	isomerase [Flavobacterium sp. IR1]	0.000471728	189.746	258.221	1.36088	0.444536
PAM94361.1	amino	acid dehydrogenase [Flavobacterium sp. IR1]	0.813815	230.603	205.533	0.891283	-0.166044
PAM94362.1	hypothetical	protein B4N84_14945 [Flavobacterium sp. IR1]	0.0453277	6.3942	11.9476	1.86851	0.901887
PAM94364.1	biopolymer	transporter ExbB [Flavobacterium sp. IR1]	9.2e-08	834.599	129.787	0.155508	-2.68494	0.26	Other
PAM94378.1	transcriptional	regulator [Flavobacterium sp. IR1]	0.000833064	70.2459	42.7761	0.608948	-0.71561
PAM94381.1	hypothetical	protein B4N84_15060 [Flavobacterium sp. IR1]	1.2e-05	41.4172	17.5226	0.423075	-1.24101	0.71	Yes (Signal peptide)	Bacteria cell wall synthesis and modification
PAM94382.1	hypothetical	protein B4N84_15065 [Flavobacterium sp. IR1]	0.558218	117.918	95.7803	0.812264	-0.29998
PAM94394.1	transketolase	[Flavobacterium sp. IR1]	9.97e-06	214.129	115.19	0.537948	-0.894461
PAM94395.1	hypothetical	protein B4N84_13230 [Flavobacterium sp. IR1]	0.105898	92.5253	97.7816	1.05681	0.0797156
PAM94398.1	peptidase	M23 [Flavobacterium sp. IR1]	2.03e-05	1187.8	538.196	0.453102	-1.14209	0.71	Yes (Signal peptide)	Proteolysis
PAM94400.1	DUF2807	domain-containing protein [Flavobacterium sp. IR1]	0.672144	998.56	895.496	0.896788	-0.157162
PAM94402.1	rhomboid	family intramembrane serine protease [Flavobacterium sp. IR1]	3.78e-07	147.885	26.2708	0.177644	-2.49294	0.16	Other
PAM94403.1	peptidase	[Flavobacterium sp. IR1]	0.0125481	76.8872	89.301	1.16146	0.215933
PAM94405.1	SusC/RagA	family protein [Flavobacterium sp. IR1]	2.01e-08	22.4535	76.7273	3.41716	1.7728	0.95	Yes (Signal peptide)	Carbohydrate metabolism
PAM94406.1	TonB-dependent	receptor [Flavobacterium sp. IR1]	2.79e-05	261.341	403.879	1.54541	0.627989
PAM94408.1	D-arabinose	5-phosphate isomerase [Flavobacterium sp. IR1]	0.0169761	51.9901	42.2384	0.812431	-0.299683
PAM94409.1	hypothetical	protein B4N84_14170 [Flavobacterium sp. IR1]	0.433922	47.6451	48.6108	1.02027	0.0289462
PAM94412.1;WP_007803657.1	30S;MULTISPECIES:	ribosomal protein S8 [Flavobacterium sp. IR1];30S ribosomal protein S8 [Flavobacterium]	0.0119692	386.231	307.37	0.79582	-0.329487
PAM94413.1	hypothetical	protein B4N84_14655 [Flavobacterium sp. IR1]	0.00436668	62.2644	47.7699	0.76721	-0.382307
PAM94414.1	tetrahydrofolate	synthase [Flavobacterium sp. IR1]	3.19e-05	26.4724	32.8447	1.24071	0.31117
PAM94544.1	hypothetical	protein B4N84_11220 [Flavobacterium sp. IR1]	0.373893	38.9791	44.6099	1.14446	0.194664
PAM94547.1	PKD	domain-containing protein [Flavobacterium sp. IR1]	0.544036	30.3346	30.7793	1.01466	0.020997
PAM94553.1	hypothetical	protein B4N84_11270 [Flavobacterium sp. IR1]	6.5e-07	36.9485	95.0222	2.57175	1.36275	0.16	Other
PAM94554.1	type	VI secretion system contractile sheath protein TssC [Flavobacterium sp. IR1]	0.0594827	71.7492	104.929	1.46243	0.548372
PAM94555.1	hypothetical	protein B4N84_11280 [Flavobacterium sp. IR1]	0.706227	183.966	132.403	0.719716	-0.474501
PAM94583.1	hypothetical	protein B4N84_11425 [Flavobacterium sp. IR1]	1.23e-05	25.7828	63.6838	2.47002	1.30452	0.67	Yes (Signal peptide)	Transport
PAM94590.1;PAM96334.1;WP_072973578.1	hypothetical;hypothetical;MULTISPECIES:	protein B4N84_11460 [Flavobacterium sp. IR1];protein B4N84_02610 [Flavobacterium sp. IR1];DUF6428 family protein [Flavobacterium]	0.0382275	59.6104	40.4965	0.679353	-0.557766
PAM94623.1	heavy	metal transporter [Flavobacterium sp. IR1]	0.551439	15.5742	16.4865	1.05858	0.0821239
PAM94655.1	hypothetical	protein B4N84_11820 [Flavobacterium sp. IR1]	4.65e-05	224.991	76.0568	0.338044	-1.56472	0.09	Other
PAM94659.1	hypothetical	protein B4N84_11840 [Flavobacterium sp. IR1]	0.454313	69.6348	65.4038	0.939239	-0.0904352
PAM94669.1	cysteine	hydrolase [Flavobacterium sp. IR1]	0.291708	70.0419	62.794	0.89652	-0.157593
PAM94670.1	cytochrome	C [Flavobacterium sp. IR1]	0.277701	101.13	110.649	1.09412	0.129772
PAM94673.1	hypothetical	protein B4N84_11915 [Flavobacterium sp. IR1]	0.00561757	39.3974	12.9954	0.329855	-1.60009	0.92	Yes (Lipoprotein signal peptide)	X
PAM94674.1	superoxide	dismutase [Flavobacterium sp. IR1]	9.7e-05	288.226	190.896	0.662314	-0.594413
PAM94677.1	hypothetical	protein B4N84_11935 [Flavobacterium sp. IR1]	0.0539981	30.559	19.2797	0.630901	-0.664515
PAM94684.1	hypothetical	protein B4N84_11970 [Flavobacterium sp. IR1]	0.0155494	50.1135	21.8454	0.435919	-1.19787
PAM94695.1	hypothetical	protein B4N84_12025 [Flavobacterium sp. IR1]	0.000969854	31.3135	60.004	1.91623	0.938273
PAM94696.1	phage	tail protein [Flavobacterium sp. IR1]	0.427718	8.15762	7.24264	0.887837	-0.171633
PAM94704.1	hypothetical	protein B4N84_12070 [Flavobacterium sp. IR1]	0.749337	32.6258	47.4957	1.45577	0.541783
PAM94771.1	acetyl-CoA	acetyltransferase [Flavobacterium sp. IR1]	0.00429223	384.704	261.071	0.678627	-0.559309
PAM94774.1	aldo/keto	reductase [Flavobacterium sp. IR1]	0.0104133	54.4038	75.5359	1.38843	0.473456
PAM94775.1	NADPH	quinone reductase MdaB [Flavobacterium sp. IR1]	0.0448469	25.1889	19.9853	0.79342	-0.333844
PAM94776.1	antibiotic	biosynthesis monooxygenase [Flavobacterium sp. IR1]	1.65e-05	637.749	858.359	1.34592	0.428591
PAM94778.1	LysR	family transcriptional regulator [Flavobacterium sp. IR1]	7.03e-06	14.3929	38.4061	2.66841	1.41598	0.21	Other
PAM94780.1	heat-shock	protein [Flavobacterium sp. IR1]	0.0614607	99.6655	101.099	1.01438	0.0206027
PAM94786.1	hypothetical	protein B4N84_10050 [Flavobacterium sp. IR1]	4.5e-06	4.17451	20.3082	4.8648	2.28238	0.9	Yes (Signal peptide)	Transport
PAM94791.1	bifunctional	molybdenum cofactor biosynthesis protein MoaC/MoaB [Flavobacterium sp. IR1]	0.00253711	68.8505	78.235	1.1363	0.184346
PAM94792.1	molybdopterin	converting factor [Flavobacterium sp. IR1]	0.0256509	15.5989	37.5372	2.4064	1.26687
PAM94801.1	nitrite	reductase [Flavobacterium sp. IR1]	0.377778	19.2581	41.926	2.17706	1.12238
PAM94805.1	ornithine--oxo-acid	transaminase [Flavobacterium sp. IR1]	0.000229294	54.7479	189.269	3.45711	1.78957	0.06	Other
PAM94807.1	dienelactone	hydrolase [Flavobacterium sp. IR1]	0.000439146	216.079	241.865	1.11933	0.162639
PAM94809.1	peptidase	M28 [Flavobacterium sp. IR1]	0.181956	1023.57	814.989	0.796222	-0.328757
PAM94814.1	tRNA	pseudouridine(38-40) synthase TruA [Flavobacterium sp. IR1]	2.28e-05	3.71335	16.0864	4.33204	2.11505	0.28	Other
PAM94818.1	dihydrolipoyl	dehydrogenase [Flavobacterium sp. IR1]	0.0187608	289.716	198.015	0.683479	-0.54903
PAM94821.1	hypothetical	protein B4N84_10230 [Flavobacterium sp. IR1]	0.000539592	37.1491	51.3975	1.38354	0.468369
PAM94823.1	hypothetical	protein B4N84_10240 [Flavobacterium sp. IR1]	0.0614764	342.188	262.714	0.767747	-0.381298
PAM94824.1	riboflavin	biosynthesis protein [Flavobacterium sp. IR1]	4.71e-06	161.757	94.0969	0.581718	-0.781608
PAM94826.1	serine	hydrolase [Flavobacterium sp. IR1]	0.0139974	49.5472	32.8482	0.662969	-0.592986
PAM94830.1	hypothetical	protein B4N84_10275 [Flavobacterium sp. IR1]	0.0158179	445.642	397.62	0.89224	-0.164496
PAM94831.1	hypothetical	protein B4N84_10280 [Flavobacterium sp. IR1]	0.0402648	25.4337	25.8174	1.01509	0.0216028
PAM94838.1	hypothetical	protein B4N84_10325 [Flavobacterium sp. IR1]	0.000301863	10.8763	21.1457	1.9442	0.959179
PAM94841.1	bacillithiol	biosynthesis deacetylase BshB1 [Flavobacterium sp. IR1]	1.46e-07	609.287	210.136	0.344888	-1.5358	0.05	Other
PAM94842.1	isochorismate	synthase [Flavobacterium sp. IR1]	0.0599637	32.3479	27.6335	0.854261	-0.227252
PAM94843.1	thioesterase	[Flavobacterium sp. IR1]	0.000160003	49.6611	74.4242	1.49864	0.583655
PAM94844.1	hypothetical	protein B4N84_10360 [Flavobacterium sp. IR1]	2.65e-06	1077.32	1567.56	1.45505	0.541065
PAM94845.1	endonuclease	I [Flavobacterium sp. IR1]	1.21e-05	8.27434	17.916	2.16524	1.11453	0.95	Yes (Signal peptide)	X
PAM94846.1	phosphoribosylformylglycinamidine	synthase [Flavobacterium sp. IR1]	0.320554	51.0696	41.5607	0.813804	-0.297246
PAM94847.1	hypothetical	protein B4N84_10375 [Flavobacterium sp. IR1]	0.2645	34.4684	31.8476	0.923966	-0.114089
PAM94848.1	long-chain	fatty acid--CoA ligase [Flavobacterium sp. IR1]	0.910784	36.0308	31.1029	0.863231	-0.212181
PAM94849.1	hypothetical	protein B4N84_10385 [Flavobacterium sp. IR1]	0.00175604	68.9606	27.0831	0.392733	-1.34838	0.6	Yes (Signal peptide)	Transport
PAM94850.1	molybdenum	metabolism regulator [Flavobacterium sp. IR1]	0.112548	17.1244	12.1383	0.70883	-0.496489
PAM94852.1	hypothetical	protein B4N84_10400 [Flavobacterium sp. IR1]	2.09e-05	49.0966	16.8263	0.342717	-1.54491	0.1	Other
PAM94861.1	hydrolase	TatD [Flavobacterium sp. IR1]	0.00053551	14.0153	5.74394	0.409833	-1.28689	0.08	Other
PAM94866.1	3-hydroxyacyl-CoA	dehydrogenase [Flavobacterium sp. IR1]	1.16e-07	87.7082	156.709	1.78671	0.837302
PAM94867.1	acetyl-CoA	acetyltransferase [Flavobacterium sp. IR1]	3.07e-05	130.183	177.696	1.36497	0.448873
PAM94868.1	acyl-CoA	dehydrogenase [Flavobacterium sp. IR1]	4.86e-08	43.7759	105.829	2.41752	1.27353	0.07	Other
PAM94869.1	glycoside	hydrolase [Flavobacterium sp. IR1]	0.407142	310.173	329.141	1.06115	0.0856313
PAM94870.1	hypothetical	protein B4N84_10495 [Flavobacterium sp. IR1]	0.00107139	61.0856	33.7552	0.552589	-0.855721
PAM94871.1	META	domain-containing protein [Flavobacterium sp. IR1]	8.07e-05	219.109	265.273	1.21069	0.275829
PAM94872.1	superoxide	dismutase [Flavobacterium sp. IR1]	1.42e-05	12617.6	4438.95	0.351806	-1.50715	0.88	Yes (Lipoprotein signal peptide)	Stress response
PAM94874.1	carbonate	dehydratase [Flavobacterium sp. IR1]	0.167663	407.137	367.124	0.901722	-0.149245
PAM94877.1	DNA	starvation/stationary phase protection protein [Flavobacterium sp. IR1]	5.37e-06	1144.07	136.487	0.119299	-3.06734	0.31	Other
PAM94881.1	branched	chain amino acid aminotransferase [Flavobacterium sp. IR1]	0.0091935	312.153	401.018	1.28468	0.361411
PAM94886.1	sensor	of ECF-type sigma factor [Flavobacterium sp. IR1]	5.21e-05	264.25	157.527	0.596129	-0.746304
PAM94887.1	oxidoreductase	[Flavobacterium sp. IR1]	4.57e-06	131.012	252.849	1.92997	0.948576
PAM94888.1	hypothetical	protein B4N84_10590 [Flavobacterium sp. IR1]	0.852327	58.2517	57.771	0.991747	-0.0119556
PAM94891.1	O-succinylbenzoic	acid--CoA ligase [Flavobacterium sp. IR1]	0.00331867	112.581	45.3423	0.402754	-1.31203	0.03	Other
PAM94893.1	arsenate	reductase (glutaredoxin) [Flavobacterium sp. IR1]	5.29e-06	197.907	352.85	1.78291	0.834233
PAM94894.1	TonB-dependent	receptor [Flavobacterium sp. IR1]	6.51e-05	15.9241	27.9604	1.75586	0.812174
PAM94896.1	fumarate	hydratase, class II [Flavobacterium sp. IR1]	2.46e-07	1191.27	227.602	0.191058	-2.38791	0.18	Other
PAM94897.1	alanine	dehydrogenase [Flavobacterium sp. IR1]	8.36e-05	549.773	788.274	1.43382	0.519862
PAM94898.1	penicillin-binding	protein [Flavobacterium sp. IR1]	0.00177551	59.9235	36.5939	0.610677	-0.711519
PAM94904.1	hypothetical	protein B4N84_10685 [Flavobacterium sp. IR1]	0.0442279	44.2032	68.8015	1.55648	0.638289
PAM94905.1	hypothetical	protein B4N84_10700 [Flavobacterium sp. IR1]	0.0304085	228.798	231.536	1.01197	0.0171616
PAM94906.1	hypothetical	protein B4N84_10705 [Flavobacterium sp. IR1]	0.926598	5048.36	4972.75	0.985024	-0.0217689
PAM94907.1	hypothetical	protein B4N84_10710 [Flavobacterium sp. IR1]	0.170802	174.94	135.278	0.773285	-0.370927
PAM94908.1	hypothetical	protein B4N84_10715 [Flavobacterium sp. IR1]	8.15e-10	907.201	2245.56	2.47526	1.30758	0.5	Yes (Lipoprotein signal peptide)	X
PAM94918.1	hypothetical	protein B4N84_10765 [Flavobacterium sp. IR1]	0.158448	145.164	125.085	0.861678	-0.214779
PAM94919.1	hypothetical	protein B4N84_10770 [Flavobacterium sp. IR1]	3.45e-10	166.697	251.312	1.5076	0.592256
PAM94920.1	hypothetical	protein B4N84_10775 [Flavobacterium sp. IR1]	0.398804	265.027	207.095	0.781411	-0.355846
PAM94921.1	hypothetical	protein B4N84_10780 [Flavobacterium sp. IR1]	0.0510061	52.1708	52.5371	1.00702	0.0100945
PAM94922.1	hypothetical	protein B4N84_10785 [Flavobacterium sp. IR1]	0.00262771	1964.33	1397.66	0.711519	-0.491026
PAM94924.1	hypothetical	protein B4N84_10795 [Flavobacterium sp. IR1]	0.000156623	42.2088	30.5219	0.723116	-0.467701
PAM94937.1	hypothetical	protein B4N84_10865 [Flavobacterium sp. IR1]	1.27e-08	186.752	610.389	3.26844	1.7086	0.81	Yes (Signal peptide)	Stress response
PAM94951.1	L-serine	ammonia-lyase [Flavobacterium sp. IR1]	0.0959846	35.7335	25.6242	0.717094	-0.479766
PAM94955.1	hypothetical	protein B4N84_10690 [Flavobacterium sp. IR1]	7.51e-06	564.48	776.549	1.37569	0.460153
PAM94965.1	DUF305	domain-containing protein [Flavobacterium sp. IR1]	0.00238065	10.2736	3.2512	0.316461	-1.6599	0.62	Yes (Lipoprotein signal peptide)	X
PAM94966.1	hydroxyacid	dehydrogenase [Flavobacterium sp. IR1]	0.000488449	214.421	158.722	0.740236	-0.433942
PAM94969.1	beta-galactosidase	[Flavobacterium sp. IR1]	0.00940042	30.8628	35.3702	1.14604	0.196663
PAM94973.1	12-oxophytodienoate	reductase [Flavobacterium sp. IR1]	0.185566	91.2551	80.2047	0.878906	-0.186219
PAM94975.1	glycosyl	hydrolase [Flavobacterium sp. IR1]	0.000655632	280.757	369.377	1.31564	0.39577
PAM94977.1	glycosyl	hydrolase [Flavobacterium sp. IR1]	7.53e-10	823.344	1853.76	2.2515	1.17089	0.84	Yes (Signal peptide)	Carbohydrate metabolism/Starch and sucrose metabolism/Degradation of flavonoids/Cyanoamino acid metabolism
PAM94978.1	esterase	[Flavobacterium sp. IR1]	0.00895914	79.9307	120.062	1.50207	0.586954
PAM94979.1	beta-glucosidase	[Flavobacterium sp. IR1]	0.000753236	27.8164	33.2622	1.19578	0.257946
PAM94980.1	TonB-dependent	receptor [Flavobacterium sp. IR1]	1.04e-10	25.6734	67.4448	2.62703	1.39343	0.91	Yes (Signal peptide)	Carbohydrate metabolism/Starch and sucrose metabolism/Degradation of flavonoids/Cyanoamino acid metabolism
PAM94981.1	acyl-CoA	oxidase [Flavobacterium sp. IR1]	8.5e-09	157.9	89.8469	0.56901	-0.813473
PAM94990.1	serine	hydroxymethyltransferase [Flavobacterium sp. IR1]	0.00976361	792.634	609.948	0.76952	-0.377969
PAM94991.1	fumarylacetoacetase	[Flavobacterium sp. IR1]	0.0125197	499.851	531.765	1.06385	0.0892899
PAM94992.1	agmatine	deiminase [Flavobacterium sp. IR1]	0.00975357	66.4342	35.6579	0.53674	-0.897704
PAM94993.1	flagellar	motor protein MotB [Flavobacterium sp. IR1]	0.00387759	192.363	136.307	0.708593	-0.496971
PAM94995.1	hypothetical	protein B4N84_06840 [Flavobacterium sp. IR1]	1.06e-05	2.5885	22.8967	8.84554	3.14495	0.05	Other
PAM94996.1	hypothetical	protein B4N84_06845 [Flavobacterium sp. IR1]	6.27e-08	36.0036	79.761	2.21537	1.14754	0.95	Yes (Signal peptide)	Carbohydrate metabolism/Starch and sucrose metabolism/Degradation of flavonoids/Cyanoamino acid metabolism
PAM94997.1	hypothetical	protein B4N84_06850 [Flavobacterium sp. IR1]	0.00693202	20.568	27.9734	1.36004	0.44365
PAM95002.1	ATP-dependent	chaperone ClpB [Flavobacterium sp. IR1]	0.570827	21.0394	16.1776	0.768922	-0.379092
PAM95006.1	hypothetical	protein B4N84_06895 [Flavobacterium sp. IR1]	0.00774194	14824.9	11663.4	0.786742	-0.346037
PAM95007.1	argininosuccinate	lyase [Flavobacterium sp. IR1]	0.672769	43.5798	18.9622	0.435115	-1.20053
PAM95014.1	aspartate	aminotransferase family protein [Flavobacterium sp. IR1]	0.0262894	7.23072	12.6581	1.7506	0.807849
PAM95015.1	N-acetyl-gamma-glutamyl-phosphate	reductase [Flavobacterium sp. IR1]	0.000547921	120.428	63.7632	0.52947	-0.91738
PAM95016.1	argininosuccinate	synthase [Flavobacterium sp. IR1]	7.49e-07	152.253	55.8456	0.366795	-1.44695	0.12	Other
PAM95018.1	peptidase	M1 [Flavobacterium sp. IR1]	7.65e-06	1829.99	2262.16	1.23616	0.305865
PAM95019.1	aldose	epimerase [Flavobacterium sp. IR1]	0.438706	29.2818	24.9624	0.852489	-0.230246
PAM95021.1	hypothetical	protein B4N84_06970 [Flavobacterium sp. IR1]	0.00217156	699.736	810.673	1.15854	0.212309
PAM95026.1	3-hydroxybutyryl-CoA	dehydrogenase [Flavobacterium sp. IR1]	0.0900752	71.8294	80.4358	1.11982	0.163263
PAM95027.1	YggS	family pyridoxal phosphate-dependent enzyme [Flavobacterium sp. IR1]	0.536301	64.0088	56.3272	0.879991	-0.18444
PAM95035.1	DNA-binding	response regulator [Flavobacterium sp. IR1]	0.0145527	80.9415	50.5657	0.62472	-0.678719
PAM95039.1	trans-2-enoyl-CoA	reductase [Flavobacterium sp. IR1]	1.32e-07	144.893	78.363	0.540833	-0.886744
PAM95041.1	DNA	repair protein RecN [Flavobacterium sp. IR1]	0.0602244	10.1188	2.79728	0.276445	-1.85494
PAM95042.1	DUF4835	domain-containing protein [Flavobacterium sp. IR1]	0.878313	164.287	155.713	0.947811	-0.0773291
PAM95045.1	outer	membrane protein assembly factor BamD [Flavobacterium sp. IR1]	0.089148	57.1141	41.2074	0.721492	-0.470945
PAM95046.1	4-hydroxy-tetrahydrodipicolinate	synthase [Flavobacterium sp. IR1]	0.000586252	53.6822	110.917	2.06618	1.04697	0.07	Other
PAM95048.1	hypothetical	protein B4N84_07105 [Flavobacterium sp. IR1]	0.00248848	136.269	103.891	0.762395	-0.39139
PAM95051.1	DNA	ligase (NAD(+)) LigA [Flavobacterium sp. IR1]	0.486462	32.1639	28.0842	0.87316	-0.195682
PAM95052.1	flagellar	motor protein MotB [Flavobacterium sp. IR1]	0.023469	1642.46	1645.41	1.0018	0.0025898
PAM95053.1	hypothetical	protein B4N84_07130 [Flavobacterium sp. IR1]	4.31e-05	282.551	365.706	1.2943	0.372172
PAM95054.1	hypothetical	protein B4N84_07135 [Flavobacterium sp. IR1]	0.350327	8601.82	7696.49	0.894751	-0.160442
PAM95057.1	TonB-dependent	receptor [Flavobacterium sp. IR1]	5.43e-08	265.644	1054.17	3.96837	1.98855	0.94	Yes (Signal peptide)	Transport
PAM95058.1	50S	ribosomal protein L9 [Flavobacterium sp. IR1]	1.1e-07	19.8132	35.5052	1.792	0.84157
PAM95059.1;WP_002987043.1	30S;MULTISPECIES:	ribosomal protein S18 [Flavobacterium sp. IR1];30S ribosomal protein S18 [Flavobacteriaceae]	0.0168792	46.6986	54.7818	1.17309	0.230317
PAM95060.1;WP_007810575.1	30S;MULTISPECIES:	ribosomal protein S6 [Flavobacterium sp. IR1];30S ribosomal protein S6 [Flavobacterium]	0.0670075	1997.19	1313.47	0.657659	-0.604588
PAM95061.1	DNA-binding	response regulator [Flavobacterium sp. IR1]	0.000315724	5.03185	13.383	2.65966	1.41124	0.1	Other
PAM95062.1	primosomal	protein N' [Flavobacterium sp. IR1]	0.308805	10.0358	14.5508	1.44989	0.535944
PAM95063.1	hypothetical	protein B4N84_07185 [Flavobacterium sp. IR1]	0.000889052	611.458	892.127	1.45902	0.544996
PAM95065.1	nicotinate-nucleotide	diphosphorylase (carboxylating) [Flavobacterium sp. IR1]	0.741939	535.944	546.536	1.01976	0.0282342
PAM95067.1	hypothetical	protein B4N84_07205 [Flavobacterium sp. IR1]	0.0162231	49.8469	69.9436	1.40317	0.488688
PAM95068.1	osmotically	inducible protein OsmC [Flavobacterium sp. IR1]	0.246129	110.78	107.362	0.969143	-0.0452183
PAM95069.1	GNAT	family N-acetyltransferase [Flavobacterium sp. IR1]	0.374846	53.9753	295.798	5.48025	2.45424
PAM95070.1	adenosine	deaminase [Flavobacterium sp. IR1]	1.6e-06	510.912	172.799	0.338216	-1.56398	0.09	Yes (Signal peptide)	Purine metabolism
PAM95072.1;WP_029269532.1	23S;MULTISPECIES:	rRNA (pseudouridine(1915)-N(3))-methyltransferase RlmH [Flavobacterium sp. IR1];23S rRNA (pseudouridine(1915)-N(3))-methyltransferase RlmH [Flavobacterium]	0.00603543	14.0084	15.9698	1.14001	0.189051
PAM95074.1	dihydropteroate	synthase [Flavobacterium sp. IR1]	0.0114313	7.66201	3.56267	0.464978	-1.10477
PAM95075.1	hypothetical	protein B4N84_07245 [Flavobacterium sp. IR1]	0.0337923	18.36	23.564	1.28344	0.360019
PAM95076.1	DoxX	family protein [Flavobacterium sp. IR1]	0.00865281	25.3172	32.4455	1.28156	0.357901
PAM95078.1	alkyl	hydroperoxide reductase [Flavobacterium sp. IR1]	0.00914412	223.658	249.512	1.11559	0.157812
PAM95079.1	triose-phosphate	isomerase [Flavobacterium sp. IR1]	0.0216981	102.604	160.472	1.564	0.645241
PAM95080.1	50S	ribosomal protein L11 methyltransferase [Flavobacterium sp. IR1]	0.00684503	11.6498	6.87543	0.590173	-0.760789
PAM95082.1	2-dehydro-3-deoxyphosphooctonate	aldolase [Flavobacterium sp. IR1]	6.19e-05	32.7379	44.8288	1.36932	0.453462
PAM95085.1	3-deoxy-8-phosphooctulonate	synthase [Flavobacterium sp. IR1]	3.49e-05	865	498.746	0.576584	-0.794396
PAM95086.1	hypothetical	protein B4N84_07305 [Flavobacterium sp. IR1]	0.00356517	252.238	261.009	1.03477	0.0493159
PAM95087.1	peptidoglycan	peptidase [Flavobacterium sp. IR1]	0.000161872	78.5035	158.64	2.02081	1.01493	0.1	Other
PAM95089.1	peptidase	M28 family protein [Flavobacterium sp. IR1]	0.000336105	945.875	1076.86	1.13849	0.187115
PAM95090.1	xylosidase	[Flavobacterium sp. IR1]	1.15e-07	87.6351	163.68	1.86774	0.901296
PAM95091.1	glycerophosphodiester	phosphodiesterase [Flavobacterium sp. IR1]	0.0067993	47.9059	134.754	2.81288	1.49205	0.05	Yes (Lipoprotein signal peptide)	Lipid metabolism/Glycerophospholipid metabolism
PAM95092.1	beta-glucosidase	[Flavobacterium sp. IR1]	2.52e-09	544.444	1862.66	3.42122	1.77451	0.6	Yes (Signal peptide)	Carbohydrate metabolism/Starch and sucrose metabolism/Degradation of flavonoids/Cyanoamino acid metabolism
PAM95093.1	beta-glucosidase	[Flavobacterium sp. IR1]	0.00286437	94.6563	123.554	1.30529	0.384376
PAM95094.1	RagB/SusD	family nutrient uptake outer membrane protein [Flavobacterium sp. IR1]	4.32e-07	6241.59	13409.6	2.14842	1.10328	0.69	Yes (Lipoprotein signal peptide)	Carbohydrate metabolism/Starch and sucrose metabolism/Degradation of flavonoids/Cyanoamino acid metabolism
PAM95095.1	SusC/RagA	family TonB-linked outer membrane protein [Flavobacterium sp. IR1]	3.51e-09	3768.6	8272.31	2.19506	1.13426	0.88	Yes (Signal peptide)	Carbohydrate metabolism/Starch and sucrose metabolism/Degradation of flavonoids/Cyanoamino acid metabolism
PAM95097.1	acetate	kinase [Flavobacterium sp. IR1]	1.16e-05	163.885	42.3359	0.258326	-1.95273	0.06	Other
PAM95098.1	phosphate	acetyltransferase [Flavobacterium sp. IR1]	0.000617718	90.6684	71.2003	0.785283	-0.348716
PAM95127.1	hypothetical	protein B4N84_07530 [Flavobacterium sp. IR1]	0.00479191	29.5231	17.3155	0.586507	-0.769781
PAM95130.1;PAM95174.1	hypothetical	protein B4N84_07545 [Flavobacterium sp. IR1];protein B4N84_07810 [Flavobacterium sp. IR1]	0.583736	260.367	205.911	0.790847	-0.33853
PAM95137.1	hypothetical	protein B4N84_07585 [Flavobacterium sp. IR1]	0.018857	29.7601	17.4136	0.585132	-0.773167
PAM95151.1	hypothetical	protein B4N84_07670 [Flavobacterium sp. IR1]	0.0303169	105.973	56.3385	0.531632	-0.911499
PAM95155.1	hypothetical	protein B4N84_07690 [Flavobacterium sp. IR1]	0.269403	36.7174	43.1134	1.1742	0.231673
PAM95159.1	hypothetical	protein B4N84_07710 [Flavobacterium sp. IR1]	0.157583	25.3639	16.2921	0.642334	-0.638605
PAM95161.1	hypothetical	protein B4N84_07720 [Flavobacterium sp. IR1]	0.611374	41.0654	49.5231	1.20596	0.27018
PAM95173.1	hypothetical	protein B4N84_07805 [Flavobacterium sp. IR1]	0.0352213	39.0107	87.649	2.24679	1.16787
PAM95184.1	MBL	fold metallo-hydrolase [Flavobacterium sp. IR1]	0.304745	141.707	108.419	0.765092	-0.386295
PAM95188.1	glyoxalase/bleomycin	resistance/dioxygenase family protein [Flavobacterium sp. IR1]	0.966338	61.3584	59.6947	0.972887	-0.0396564
PAM95195.1	hydrolase	[Flavobacterium sp. IR1]	0.294354	68.3711	73.8212	1.07971	0.110649
PAM95206.1;WP_035688600.1	hypothetical;MULTISPECIES:	protein B4N84_07995 [Flavobacterium sp. IR1];hypothetical protein [Flavobacterium]	8.48e-06	129.3	25.1078	0.194183	-2.36451	0.96	Yes (Lipoprotein signal peptide)	X
PAM95211.1	molecular	chaperone DnaK [Flavobacterium sp. IR1]	0.98916	1405.14	1444.79	1.02822	0.040154
PAM95213.1	hypothetical	protein B4N84_08035 [Flavobacterium sp. IR1]	0.00297557	12.5414	26.126	2.08318	1.05878	0.04	Other
PAM95218.1	phage	envelope protein [Flavobacterium sp. IR1]	0.193946	410.5	408.692	0.995597	-0.00636612
PAM95223.1	PASTA	domain-containing protein [Flavobacterium sp. IR1]	0.0804164	50.9384	30.0925	0.590762	-0.759352
PAM95224.1	D-alanine--D-alanine	ligase A [Flavobacterium sp. IR1]	8.34e-08	1364.48	302.745	0.221876	-2.17217	0.05	Other
PAM95228.1	PhnA	protein [Flavobacterium sp. IR1]	6.5e-07	20.9439	52.8763	2.52466	1.33609	0.07	Other
PAM95229.1	hypothetical	protein B4N84_08115 [Flavobacterium sp. IR1]	0.291962	18281.9	18358	1.00416	0.00599008
PAM95230.1	helicase	[Flavobacterium sp. IR1]	0.203146	2.84413	8.98772	3.16009	1.65997
PAM95231.1	hypothetical	protein B4N84_08125 [Flavobacterium sp. IR1]	5.29e-06	525.489	584.964	1.11318	0.154687
PAM95237.1	orotate	phosphoribosyltransferase [Flavobacterium sp. IR1]	0.267687	39.5073	30.2052	0.764546	-0.387325
PAM95238.1	orotate	phosphoribosyltransferase [Flavobacterium sp. IR1]	0.000884182	68.8495	41.0689	0.596503	-0.745399
PAM95240.1;WP_017496527.1	ribosome;MULTISPECIES:	silencing factor RsfS [Flavobacterium sp. IR1];ribosome silencing factor [Flavobacterium]	7.11e-08	86.5435	174.205	2.01291	1.00929	0.04	Other
PAM95241.1	peptidase	M41 [Flavobacterium sp. IR1]	0.000198216	121.01	93.0579	0.769008	-0.37893
PAM95244.1	phosphatidylserine	decarboxylase family protein [Flavobacterium sp. IR1]	4.78e-05	39.0516	69.7208	1.78535	0.836209
PAM95246.1	superoxide	dismutase [Flavobacterium sp. IR1]	0.291595	56.8403	49.8631	0.87725	-0.188939
PAM95247.1	alpha-amylase	[Flavobacterium sp. IR1]	2.7e-07	243.01	467.914	1.9255	0.94523
PAM95248.1	OstA-like	protein [Flavobacterium sp. IR1]	4.54e-05	53.6876	33.8579	0.630646	-0.665097
PAM95249.1	aspartate	aminotransferase family protein [Flavobacterium sp. IR1]	0.0100105	221.41	137.514	0.621086	-0.687135
PAM95251.1	shikimate	dehydrogenase [Flavobacterium sp. IR1]	0.000348619	11.8476	87.2668	7.36576	2.88083	0.18	Other
PAM95252.1	chromosome	segregation protein [Flavobacterium sp. IR1]	0.00460561	66.5581	46.0198	0.691423	-0.53236
PAM95253.1	OsmC	family peroxiredoxin [Flavobacterium sp. IR1]	0.00182907	1977.85	2290.34	1.158	0.211633
PAM95254.1	hypothetical	protein B4N84_08240 [Flavobacterium sp. IR1]	0.000371329	6440.31	4729.13	0.734302	-0.445555
PAM95255.1	DNA	gyrase subunit A [Flavobacterium sp. IR1]	0.806838	74.0566	61.2655	0.82728	-0.273553
PAM95256.1	Clp	protease ClpC [Flavobacterium sp. IR1]	4.93e-05	343.711	226.266	0.658304	-0.603173
PAM95261.1	peptidase	[Flavobacterium sp. IR1]	1.38e-06	326.612	535.712	1.64021	0.713883
PAM95267.1	hypothetical	protein B4N84_08315 [Flavobacterium sp. IR1]	0.000924274	2602.23	1102.3	0.4236	-1.23923	0.04	Other
PAM95268.1	transcriptional	regulator [Flavobacterium sp. IR1]	0.267936	30.5626	23.1479	0.757393	-0.400886
PAM95269.1	hypothetical	protein B4N84_08325 [Flavobacterium sp. IR1]	7.77e-07	66.2682	33.2044	0.501061	-0.996943
PAM95270.1	hypothetical	protein B4N84_08330 [Flavobacterium sp. IR1]	0.0391409	48.6228	54.014	1.11088	0.151703
PAM95273.1	pectate	lyase [Flavobacterium sp. IR1]	9.61e-06	963.626	2567.55	2.66447	1.41385	0.95	Yes (Lipoprotein signal peptide)	Carbohydrate metabolism
PAM95274.1	hypothetical	protein B4N84_08350 [Flavobacterium sp. IR1]	2.01e-05	33.4124	91.179	2.7289	1.44832	0.06	Other
PAM95275.1	aminotransferase	class I and II [Flavobacterium sp. IR1]	0.000557957	10.3164	18.4836	1.79168	0.841315
PAM95277.1	glycine	cleavage system protein T [Flavobacterium sp. IR1]	0.667752	206.207	185.522	0.899688	-0.152504
PAM95278.1	peptidase	S41 [Flavobacterium sp. IR1]	0.0944125	19.2341	9.03223	0.469595	-1.09051
PAM95284.1	hypothetical	protein B4N84_08400 [Flavobacterium sp. IR1]	0.0037169	18.9645	10.2698	0.541524	-0.884902
PAM95286.1	hypothetical	protein B4N84_08410 [Flavobacterium sp. IR1]	1.33e-06	77.2142	16.0081	0.207321	-2.27006	0.08	Other
PAM95293.1	oligopeptidase	B [Flavobacterium sp. IR1]	9.75e-07	93.724	47.5777	0.507636	-0.978133
PAM95295.1	threonine	aldolase [Flavobacterium sp. IR1]	0.00169861	227.339	126.576	0.556774	-0.844836
PAM95297.1	peptide-methionine	(R)-S-oxide reductase [Flavobacterium sp. IR1]	8.71e-06	29.12	39.9516	1.37197	0.456244
PAM95299.1	methylcrotonoyl-CoA	carboxylase [Flavobacterium sp. IR1]	0.00452515	14.5659	22.848	1.56859	0.649468
PAM95307.1	cytochrome	C oxidase subunit III [Flavobacterium sp. IR1]	0.00726867	42.0905	51.8877	1.23276	0.301897
PAM95309.1	cytochrome	C oxidase Cbb3 [Flavobacterium sp. IR1]	0.00318941	90.2324	63.8273	0.707366	-0.499471
PAM95313.1	hypothetical	protein B4N84_08555 [Flavobacterium sp. IR1]	0.119352	82.3794	73.356	0.890465	-0.16737
PAM95314.1	peptide	deformylase [Flavobacterium sp. IR1]	8.96e-06	62.8022	184.808	2.94271	1.55714	0.05	Other
PAM95316.1	cysteine	hydrolase [Flavobacterium sp. IR1]	0.00122647	40.9055	48.8937	1.19528	0.257354
PAM95320.1	2,3,4,5-tetrahydropyridine-2,6-dicarboxylate	N-succinyltransferase [Flavobacterium sp. IR1]	0.157325	2451.44	2176.69	0.887921	-0.171497
PAM95326.1	cysteine	desulfurase [Flavobacterium sp. IR1]	0.0589972	131.329	106.826	0.813422	-0.297925
PAM95327.1	hypothetical	protein B4N84_08625 [Flavobacterium sp. IR1]	0.0130976	527.271	348.831	0.661578	-0.596017
PAM95333.1	cysteine	synthase B [Flavobacterium sp. IR1]	0.671215	9.91393	5.28231	0.532817	-0.908288
PAM95337.1	hypothetical	protein B4N84_08675 [Flavobacterium sp. IR1]	0.00494024	706.866	807.086	1.14178	0.191286
PAM95339.1	aspartate	racemase [Flavobacterium sp. IR1]	0.000208136	10.7094	6.17163	0.576281	-0.795155
PAM95342.1	SAM-dependent	methyltransferase [Flavobacterium sp. IR1]	0.232832	102.867	82.1367	0.798471	-0.324689
PAM95349.1	hypothetical	protein B4N84_08735 [Flavobacterium sp. IR1]	2.54e-05	53.6271	21.2892	0.396985	-1.33284	0.47	Other
PAM95354.1	DNA	topoisomerase IV [Flavobacterium sp. IR1]	0.417367	50.5046	54.7028	1.08312	0.115199
PAM95355.1	DNA	topoisomerase IV [Flavobacterium sp. IR1]	0.000341584	50.3094	69.5174	1.3818	0.466546
PAM95357.1	transglutaminase	[Flavobacterium sp. IR1]	0.00116234	185.417	197.672	1.06609	0.0923294
PAM95358.1	NADPH-dependent	FMN reductase [Flavobacterium sp. IR1]	0.0346344	113.863	64.2761	0.564505	-0.824941
PAM95362.1	ferric	enterobactin receptor [Flavobacterium sp. IR1]	1.41e-07	225.254	329.016	1.46065	0.546606
PAM95363.1	hypothetical	protein B4N84_08805 [Flavobacterium sp. IR1]	0.167909	180.276	172.596	0.957394	-0.0628153
PAM95364.1	ferredoxin	[Flavobacterium sp. IR1]	0.0129826	22.8757	17.7557	0.77618	-0.365536
PAM95365.1	phosphoserine	transaminase [Flavobacterium sp. IR1]	0.00111591	1468.59	1633.17	1.11207	0.153242
PAM95366.1	3-phosphoglycerate	dehydrogenase [Flavobacterium sp. IR1]	0.320575	41.148	83.1734	2.02132	1.0153
PAM95367.1	hypothetical	protein B4N84_08830 [Flavobacterium sp. IR1]	1.5e-08	55.15	193.977	3.51726	1.81445	0.95	Other	X
PAM95369.1	diacylglyceryl	transferase [Flavobacterium sp. IR1]	0.216901	25.6978	22.3234	0.868689	-0.203088
PAM95374.1	6-phosphogluconolactonase	[Flavobacterium sp. IR1]	0.000699385	320.537	155.657	0.485614	-1.04212	0.94	Yes (Signal peptide)	Carbohydrate metabolism
PAM95376.1	dihydroorotase	[Flavobacterium sp. IR1]	0.0279663	269.261	176.541	0.655651	-0.608999
PAM95378.1	phospholipase	[Flavobacterium sp. IR1]	0.0596891	85.2077	54.6791	0.641716	-0.639993
PAM95379.1	hypothetical	protein B4N84_08890 [Flavobacterium sp. IR1]	0.000254531	307.831	166.807	0.541879	-0.883958
PAM95381.1	MBL	fold metallo-hydrolase [Flavobacterium sp. IR1]	0.426306	39.9093	38.6778	0.969143	-0.0452189
PAM95382.1	nicotinate-nucleotide	adenylyltransferase [Flavobacterium sp. IR1]	5.52e-07	7.12398	33.1595	4.65464	2.21867	0.08	Other
PAM95383.1	thioredoxin-dependent	thiol peroxidase [Flavobacterium sp. IR1]	0.000282764	31.7629	14.0428	0.442114	-1.17751	0.84	Other	Stress response
PAM95387.1	laminarinase	[Flavobacterium sp. IR1]	0.052473	40.203	22.9076	0.569799	-0.811476
PAM95388.1	laminarinase	[Flavobacterium sp. IR1]	0.409833	291.88	326.302	1.11793	0.160833
PAM95389.1	hypothetical	protein B4N84_08940 [Flavobacterium sp. IR1]	1.46e-06	187.38	268.369	1.43222	0.518254
PAM95390.1	RagB/SusD	family nutrient uptake outer membrane protein [Flavobacterium sp. IR1]	0.128706	355.267	396.205	1.11523	0.157342
PAM95391.1	SusC/RagA	family protein [Flavobacterium sp. IR1]	0.000288337	481.169	609.45	1.2666	0.340963
PAM95395.1	n-acetylglutamate	synthase [Flavobacterium sp. IR1]	0.415473	25.8033	27.2343	1.05546	0.07787
PAM95400.1	hypothetical	protein B4N84_09000 [Flavobacterium sp. IR1]	0.00925424	85.4574	65.9959	0.772266	-0.372829
PAM95401.1	excinuclease	ABC subunit A [Flavobacterium sp. IR1]	2.66e-06	30.9568	36.0105	1.16325	0.218161
PAM95408.1	hypothetical	protein B4N84_09040 [Flavobacterium sp. IR1]	1.91e-09	770.331	1926.84	2.50132	1.32269	0.88	Yes (Signal peptide)	Transport
PAM95410.1	hypothetical	protein B4N84_09050 [Flavobacterium sp. IR1]	0.0168793	54.1434	56.0913	1.03598	0.0509922
PAM95411.1	8-amino-7-oxononanoate	synthase [Flavobacterium sp. IR1]	0.0196345	35.5908	56.3046	1.582	0.661749
PAM95417.1	azurin	[Flavobacterium sp. IR1]	6.21e-06	417.994	59.2211	0.141679	-2.8193	0.36	Yes (Lipoprotein signal peptide)	Electron transport
PAM95418.1	transcriptional	regulator [Flavobacterium sp. IR1]	0.0341786	53.019	150.909	2.84632	1.5091
PAM95420.1	FMN-binding	glutamate synthase family protein [Flavobacterium sp. IR1]	5.35e-06	43.8133	115.218	2.62975	1.39493	0.08	Other
PAM95421.1	hypothetical	protein B4N84_09110 [Flavobacterium sp. IR1]	0.0522502	11.2064	8.41495	0.750908	-0.413291
PAM95422.1	glucuronyl	hydrolase [Flavobacterium sp. IR1]	0.000653365	152.724	202.673	1.32706	0.408233
PAM95427.1	hypothetical	protein B4N84_09140 [Flavobacterium sp. IR1]	5.23e-09	224.674	563.355	2.50743	1.32621	0.14	Yes (Signal peptide)	Transport
PAM95430.1	cytosol	nonspecific dipeptidase [Flavobacterium sp. IR1]	0.628344	589.033	568.358	0.9649	-0.0515482
PAM95439.1	peptidase	S8 [Flavobacterium sp. IR1]	1.26e-05	1074.42	2950.32	2.74596	1.45731	0.95	Yes (Signal peptide)	Proteolysis
PAM95441.1	hypothetical	protein B4N84_09210 [Flavobacterium sp. IR1]	0.0118653	69.8232	36.0218	0.5159	-0.954835
PAM95442.1	membrane	protein insertase YidC [Flavobacterium sp. IR1]	4.31e-05	48.4014	18.4064	0.380287	-1.39484	0.21	Other
PAM95443.1	CTP	synthetase [Flavobacterium sp. IR1]	0.21634	5.45075	6.27827	1.15182	0.20391
PAM95444.1	glucosamine-6-phosphate	deaminase [Flavobacterium sp. IR1]	0.00855519	375.334	237.798	0.633563	-0.658439
PAM95448.1	SusC/RagA	family protein [Flavobacterium sp. IR1]	7.94e-06	38.9277	84.5833	2.17283	1.11958	0.93	Yes (Signal peptide)	Carbohydrate metaboolism
PAM95449.1	RagB/SusD	family nutrient uptake outer membrane protein [Flavobacterium sp. IR1]	3.84e-05	31.9703	100.853	3.15458	1.65745	0.58	Yes (Lipoprotein signal peptide)	Carbohydrate metabolism
PAM95450.1	glycosyl	hydrolase [Flavobacterium sp. IR1]	2.56e-06	30.4924	57.825	1.89637	0.923244
PAM95451.1	beta-galactosidase	[Flavobacterium sp. IR1]	0.000157744	10.5876	18.0017	1.70027	0.765761
PAM95452.1	osmotically	inducible protein OsmC [Flavobacterium sp. IR1]	0.000308095	188.059	80.84	0.429865	-1.21804	0.11	Other
PAM95453.1	peptidoglycan-binding	protein [Flavobacterium sp. IR1]	0.00215537	1003.64	739.165	0.736488	-0.441266
PAM95454.1	peptidoglycan-binding	protein [Flavobacterium sp. IR1]	5.37e-08	343.763	73.7113	0.214424	-2.22146	0.26	Yes (Signal peptide)	X
PAM95455.1	GMP	synthase (glutamine-hydrolyzing) [Flavobacterium sp. IR1]	0.103043	190.2	162.001	0.851744	-0.231509
PAM95456.1	hypothetical	protein B4N84_09305 [Flavobacterium sp. IR1]	2.87e-09	49.5237	100.243	2.02414	1.01731	0.86	Yes (Signal peptide)	X
PAM95458.1	DHH	family phosphoesterase [Flavobacterium sp. IR1]	6.1e-07	149.254	74.4644	0.49891	-1.00315	0.06	Other
PAM95460.1	peptidylprolyl	isomerase [Flavobacterium sp. IR1]	0.796688	353.725	272.777	0.771153	-0.37491
PAM95461.1	peptidylprolyl	isomerase [Flavobacterium sp. IR1]	0.0117703	445.056	521.941	1.17275	0.2299
PAM95465.1	peptidase	M61 [Flavobacterium sp. IR1]	0.00120698	1359.35	1402.29	1.03159	0.0448738
PAM95467.1	sugar	hydrolase [Flavobacterium sp. IR1]	0.00183018	361.016	473.489	1.31154	0.391267
PAM95469.1	hypothetical	protein B4N84_09370 [Flavobacterium sp. IR1]	0.839974	17.9448	18.0978	1.00853	0.0122489
PAM95471.1	glutamine	synthetase type III [Flavobacterium sp. IR1]	0.359478	441.814	428.586	0.970061	-0.0438524
PAM95472.1	hypothetical	protein B4N84_09390 [Flavobacterium sp. IR1]	0.888932	3.91761	6.32185	1.6137	0.690374
PAM95473.1	hypothetical	protein B4N84_09395 [Flavobacterium sp. IR1]	6.33e-06	28.7687	54.7662	1.90367	0.928786
PAM95474.1	esterase	[Flavobacterium sp. IR1]	0.000265363	21.3493	48.9957	2.29495	1.19847	0.61	Yes (Signal peptide)	Lipid metabolism
PAM95483.1	hypothetical	protein B4N84_09445 [Flavobacterium sp. IR1]	0.523261	30.2648	29.3643	0.970245	-0.0435792
PAM95485.1	methylmalonyl-CoA	mutase [Flavobacterium sp. IR1]	8.55e-06	30.9021	33.8229	1.09452	0.130294
PAM95491.1	hypothetical	protein B4N84_09485 [Flavobacterium sp. IR1]	0.000459674	1071.07	1466.39	1.36909	0.453212
PAM95493.1	catalase	[Flavobacterium sp. IR1]	0.0022759	142.888	135.976	0.951622	-0.071539
PAM95497.1	orotidine-5'-phosphate	decarboxylase [Flavobacterium sp. IR1]	0.194943	109.76	125.068	1.13947	0.188363
PAM95498.1	flagellar	motor protein MotB [Flavobacterium sp. IR1]	1.8e-05	4067.35	5456.33	1.34149	0.42384
PAM95504.1	hypothetical	protein B4N84_09560 [Flavobacterium sp. IR1]	0.00157883	187.433	250.905	1.33864	0.420768
PAM95527.1	hypothetical	protein B4N84_09680 [Flavobacterium sp. IR1]	0.784439	37.9315	30.277	0.798203	-0.325173
PAM95529.1	hypothetical	protein B4N84_09690 [Flavobacterium sp. IR1]	0.0431357	54.7079	60.8621	1.11249	0.153796
PAM95531.1	hypothetical	protein B4N84_09700 [Flavobacterium sp. IR1]	8.17e-10	19.8128	92.2156	4.65434	2.21858	0.94	Yes (Signal peptide)	Proteolysis
PAM95532.1	valine--tRNA	ligase [Flavobacterium sp. IR1]	0.286091	261.711	214.957	0.82135	-0.28393
PAM95533.1	hypothetical	protein B4N84_09710 [Flavobacterium sp. IR1]	0.000271569	305.354	420.444	1.37691	0.461432
PAM95534.1	hypothetical	protein B4N84_09715 [Flavobacterium sp. IR1]	0.000207217	70.0308	40.0602	0.572037	-0.805819
PAM95536.1	hypothetical	protein B4N84_09730 [Flavobacterium sp. IR1]	2.41e-08	356.479	904.708	2.5379	1.34364	0.92	Yes (Signal peptide)	Motility
PAM95537.1	signal	protein PDZ [Flavobacterium sp. IR1]	7.44e-05	31.0982	18.6604	0.600049	-0.736847
PAM95539.1	GTP	cyclohydrolase I FolE [Flavobacterium sp. IR1]	0.000187817	201.519	150.313	0.745899	-0.422948
PAM95541.1	cysteine--tRNA	ligase [Flavobacterium sp. IR1]	0.053727	61.1158	87.0794	1.42483	0.510786
PAM95543.1	prolipoprotein	diacylglyceryl transferase [Flavobacterium sp. IR1]	3.69e-05	107.118	39.2046	0.365993	-1.45011	0.18	Other
PAM95545.1	protein	translocase subunit SecDF [Flavobacterium sp. IR1]	0.0315945	75.156	60.3833	0.803439	-0.315739
PAM95546.1	DNA	topoisomerase (ATP-hydrolyzing) subunit B [Flavobacterium sp. IR1]	0.909328	50.6316	52.6545	1.03995	0.0565188
PAM95550.1	TonB-dependent	receptor [Flavobacterium sp. IR1]	1.06e-05	1784.7	909.173	0.509426	-0.973056
PAM95551.1	phenazine	biosynthesis protein PhzF [Flavobacterium sp. IR1]	0.00202224	154.299	47.6214	0.308632	-1.69604	0.23	Other
PAM95552.1	hypothetical	protein B4N84_09815 [Flavobacterium sp. IR1]	9.04e-08	1387.41	642.464	0.463068	-1.11071	0.85	Yes (Signal peptide)	LPS assembly
PAM95553.1	phosphonate	ABC transporter ATP-binding protein [Flavobacterium sp. IR1]	2.09e-07	102.362	52.914	0.516928	-0.951964
PAM95567.1	magnesium	chelatase [Flavobacterium sp. IR1]	0.505251	74.2438	81.6412	1.09964	0.137026
PAM95568.1	hypothetical	protein B4N84_09900 [Flavobacterium sp. IR1]	0.000478964	39.7662	60.8428	1.53001	0.613542
PAM95570.1	phosphoglyceromutase	[Flavobacterium sp. IR1]	0.141518	250.247	136.712	0.546306	-0.872218
PAM95574.1	endonuclease	[Flavobacterium sp. IR1]	0.000192673	96.2432	121.887	1.26645	0.340785
PAM95575.1	subclass	B1 metallo-beta-lactamase [Flavobacterium sp. IR1]	0.028213	39.0318	40.5084	1.03783	0.0535717
PAM95585.1;PAM96507.1	ketosteroid	isomerase [Flavobacterium sp. IR1]	0.0284328	17.6552	12.3808	0.701253	-0.511993
PAM95589.1	histidine	ammonia-lyase [Flavobacterium sp. IR1]	2.63e-06	26.7955	52.741	1.96828	0.976935
PAM95590.1	bifunctional	aspartate kinase/homoserine dehydrogenase I [Flavobacterium sp. IR1]	9.49e-08	1126.23	439.511	0.39025	-1.35753	0.07	Other
PAM95593.1	acyl-CoA	reductase [Flavobacterium sp. IR1]	0.784751	24.3123	17.7391	0.729635	-0.454754
PAM95594.1	LuxR	family transcriptional regulator [Flavobacterium sp. IR1]	0.000808341	55.5684	63.675	1.14589	0.196463
PAM95599.1	hypothetical	protein B4N84_09300 [Flavobacterium sp. IR1]	5e-05	66.5366	232.173	3.4894	1.80298	0.7	Yes (Lipoprotein signal peptide)	X
PAM95603.1	flagellar	motor protein MotB [Flavobacterium sp. IR1]	1.79e-07	414.086	663.884	1.60325	0.681001
PAM95604.1	malate	dehydrogenase [Flavobacterium sp. IR1]	0.118929	1345.43	1016.85	0.755785	-0.403953
PAM95627.1	trans-aconitate	methyltransferase [Flavobacterium sp. IR1]	5.66e-06	502.35	41.2287	0.0820717	-3.60697	0.27	Other
PAM95628.1	transcriptional	regulator [Flavobacterium sp. IR1]	0.40041	177.867	144.214	0.810799	-0.302584
PAM95632.1	galactose	oxidase [Flavobacterium sp. IR1]	0.618056	149.993	139.025	0.92688	-0.109546
PAM95633.1	aconitate	hydratase [Flavobacterium sp. IR1]	1.92e-08	130.588	224.327	1.71782	0.780576
PAM95634.1	bifunctional	aconitate hydratase 2/2-methylisocitrate dehydratase [Flavobacterium sp. IR1]	6.36e-05	409.256	179.722	0.439144	-1.18723	0.08	Other
PAM95635.1	AAA	family ATPase [Flavobacterium sp. IR1]	0.00129315	114.52	73.1415	0.638676	-0.646844
PAM95636.1	peptidylprolyl	isomerase [Flavobacterium sp. IR1]	0.259453	1386.78	1413.08	1.01896	0.0271002
PAM95637.1	alpha-amylase	[Flavobacterium sp. IR1]	1.96e-09	890.349	2280.94	2.56185	1.35718	0.94	Yes (Lipoprotein signal peptide)	Carbohydrate metabolism/Starch and sucrose metabolism
PAM95639.1	hypothetical	protein B4N84_05935 [Flavobacterium sp. IR1]	0.716249	29.3096	29.0239	0.990255	-0.0141287
PAM95640.1	DNA-directed	RNA polymerase subunit beta' [Flavobacterium sp. IR1]	0.0834363	165.599	149.515	0.902874	-0.147404
PAM95641.1	DNA-directed	RNA polymerase subunit beta [Flavobacterium sp. IR1]	0.0148874	115.559	114.457	0.990465	-0.0138222
PAM95642.1;WP_007807437.1	50S;MULTISPECIES:	ribosomal protein L7/L12 [Flavobacterium sp. IR1];50S ribosomal protein L7/L12 [Flavobacterium]	0.0336396	1781.27	2185.91	1.22716	0.295324
PAM95643.1	50S	ribosomal protein L10 [Flavobacterium sp. IR1]	0.0839015	5.19522	11.4112	2.19649	1.1352
PAM95644.1;WP_031456760.1	50S;MULTISPECIES:	ribosomal protein L1 [Flavobacterium sp. IR1];50S ribosomal protein L1 [Flavobacterium]	0.00188115	373.247	230.37	0.617206	-0.696175
PAM95645.1;WP_007807442.1	50S;MULTISPECIES:	ribosomal protein L11 [Flavobacterium sp. IR1];50S ribosomal protein L11 [Flavobacterium]	0.148091	1603.05	980.265	0.611501	-0.709573
PAM95646.1	transcription	termination/antitermination factor NusG [Flavobacterium sp. IR1]	1.3e-05	213.668	106.756	0.499634	-1.00106	0.18	Other
PAM95648.1;WP_031456758.1	elongation;MULTISPECIES:	factor Tu [Flavobacterium sp. IR1];elongation factor Tu [Flavobacterium]	0.00895453	2165.21	3451.78	1.5942	0.672834
PAM95649.1	ribosomal	subunit interface protein [Flavobacterium sp. IR1]	0.000494097	266.602	409.013	1.53417	0.617458
PAM95651.1;WP_026985791.1	30S;MULTISPECIES:	ribosomal protein S21 [Flavobacterium sp. IR1];30S ribosomal protein S21 [Flavobacterium]	0.00630795	35.3562	71.1301	2.01182	1.0085	0.23	Other
PAM95652.1	acyl-CoA	dehydrogenase [Flavobacterium sp. IR1]	0.616714	225.714	191.184	0.847016	-0.239539
PAM95654.1	amino	acid transporter [Flavobacterium sp. IR1]	3.88e-06	44.1154	22.1674	0.502487	-0.992843
PAM95658.1	cystathionine	beta-synthase [Flavobacterium sp. IR1]	0.175131	57.5347	37.8572	0.657988	-0.603867
PAM95659.1	hypothetical	protein B4N84_06055 [Flavobacterium sp. IR1]	3.67e-06	362.12	185.13	0.51124	-0.967926
PAM95667.1	lysine--tRNA	ligase [Flavobacterium sp. IR1]	0.125565	59.8072	37.5519	0.627883	-0.671432
PAM95669.1	hydroxyacid	dehydrogenase [Flavobacterium sp. IR1]	3.47e-05	32.8591	60.937	1.85449	0.891024
PAM95671.1	zinc-dependent	metalloprotease [Flavobacterium sp. IR1]	0.366975	35.5118	36.5453	1.0291	0.0413876
PAM95672.1	glutamate-1-semialdehyde-2,1-aminomutase	[Flavobacterium sp. IR1]	0.567064	116.682	85.2241	0.730394	-0.453252
PAM95673.1	hemagglutinin	[Flavobacterium sp. IR1]	1.51e-08	70.7131	25.9925	0.367577	-1.44388	0.95	Yes (Lipoprotein signal peptide)	Carbohydrate metabolism
PAM95677.1	D-glycerate	dehydrogenase [Flavobacterium sp. IR1]	0.0457495	62.9548	50.1964	0.79734	-0.326732
PAM95678.1	urocanate	hydratase [Flavobacterium sp. IR1]	6.86e-05	553.5	142.994	0.258344	-1.95263	0.35	Other
PAM95679.1	DUF4136	domain-containing protein [Flavobacterium sp. IR1]	0.0482271	1110.41	962.085	0.866424	-0.206856
PAM95683.1	phenylalanine	4-monooxygenase [Flavobacterium sp. IR1]	0.531914	45.0745	43.2252	0.958972	-0.06044
PAM95685.1	hypothetical	protein B4N84_06190 [Flavobacterium sp. IR1]	0.0106376	30.4504	38.6875	1.27051	0.345404
PAM95687.1	GSCFA	domain-containing protein [Flavobacterium sp. IR1]	0.000114705	98.478	62.4687	0.634342	-0.656668
PAM95688.1	hypothetical	protein B4N84_06205 [Flavobacterium sp. IR1]	4.96e-07	966.882	1547.77	1.60078	0.678777
PAM95689.1	hypothetical	protein B4N84_06210 [Flavobacterium sp. IR1]	0.00581857	240.281	278.515	1.15913	0.213037
PAM95690.1	hypothetical	protein B4N84_06215 [Flavobacterium sp. IR1]	3.11e-06	199.954	129.684	0.648571	-0.624665
PAM95691.1	hypothetical	protein B4N84_06220 [Flavobacterium sp. IR1]	4.15e-08	114.415	36.9195	0.322681	-1.63182	0.91	Yes (Lipoprotein signal peptide)	X
PAM95692.1	hypothetical	protein B4N84_06225 [Flavobacterium sp. IR1]	6.01e-05	123.396	250.443	2.02958	1.02118	0.9	Yes (Lipoprotein signal peptide)	X
PAM95695.1	alanine--tRNA	ligase [Flavobacterium sp. IR1]	1.42e-05	146.16	76.951	0.526485	-0.925537
PAM95698.1	LemA	family protein [Flavobacterium sp. IR1]	1.39e-05	270.867	148.274	0.547406	-0.869318
PAM95699.1	methanol	dehydrogenase [Flavobacterium sp. IR1]	0.000797674	40.3944	13.8823	0.343668	-1.54091	0.61	Yes (Lipoprotein signal peptide)	Methanol metabolism
PAM95701.1	TonB-dependent	receptor [Flavobacterium sp. IR1]	0.93464	24.5557	20.0193	0.815261	-0.294666
PAM95712.1	hypothetical	protein B4N84_06335 [Flavobacterium sp. IR1]	0.001254	114.416	195.59	1.70947	0.773548
PAM95715.1	hypothetical	protein B4N84_06350 [Flavobacterium sp. IR1]	0.0836732	21.9057	10.059	0.459195	-1.12282
PAM95716.1	serine	hydrolase [Flavobacterium sp. IR1]	0.425355	60.8651	46.1186	0.757718	-0.400267
PAM95723.1	hypothetical	protein B4N84_06390 [Flavobacterium sp. IR1]	0.0227662	33.0947	47.1496	1.42469	0.510647
PAM95724.1	hypothetical	protein B4N84_06395 [Flavobacterium sp. IR1]	1.22e-06	151.01	474.811	3.14424	1.65271	0.77	Yes (Signal peptide)	Transport
PAM95725.1	hypothetical	protein B4N84_06400 [Flavobacterium sp. IR1]	4.79e-07	57.292	129.972	2.26859	1.1818	0.08	Yes (Signal peptide)	X
PAM95736.1	hypothetical	protein B4N84_06470 [Flavobacterium sp. IR1]	0.0251507	14.5824	12.4467	0.85354	-0.228469
PAM95740.1	hypothetical	protein B4N84_06500 [Flavobacterium sp. IR1]	0.0434543	34.674	24.3251	0.701537	-0.51141
PAM95744.1	exopolyphosphatase	[Flavobacterium sp. IR1]	0.000482889	748.236	862.506	1.15272	0.205041
PAM95748.1	hypothetical	protein B4N84_06545 [Flavobacterium sp. IR1]	0.0847897	27.496	33.4107	1.21511	0.281089
PAM95757.1	cytochrome-c	peroxidase [Flavobacterium sp. IR1]	0.0924515	450	364.247	0.809438	-0.305007
PAM95758.1	hypothetical	protein B4N84_06595 [Flavobacterium sp. IR1]	8.46e-07	146268	68063.2	0.465333	-1.10367	0.95	Yes (Lipoprotein signal peptide)	Copper acquisition
PAM95760.1	hypothetical	protein B4N84_06610 [Flavobacterium sp. IR1]	1.14e-08	1848.66	433.664	0.234583	-2.09183	0.94	Yes (Lipoprotein signal peptide)	Nitrogen metabolism
PAM95763.1	hypothetical	protein B4N84_06260 [Flavobacterium sp. IR1]	0.103883	58.1187	48.8764	0.840976	-0.249864
PAM95764.1	alpha/beta	hydrolase [Flavobacterium sp. IR1]	6.02e-05	8.36192	17.9928	2.15176	1.10551	0.22	Other
PAM95765.1	hypothetical	protein B4N84_06425 [Flavobacterium sp. IR1]	0.00889732	25.8357	49.6803	1.92294	0.94331
PAM95768.1	TonB-dependent	receptor [Flavobacterium sp. IR1]	5.81e-05	525.186	158.165	0.301159	-1.7314	0.9	Yes (Signal peptide)	Transport
PAM95778.1	peptidase	S41 [Flavobacterium sp. IR1]	0.00319405	1918.13	2315.78	1.20731	0.271802
PAM95784.1	ferrous	iron transport protein B [Flavobacterium sp. IR1]	0.0618471	22.5522	15.2785	0.677475	-0.56176
PAM95787.1	cytochrome	C552 [Flavobacterium sp. IR1]	0.013321	35.2599	21.522	0.610382	-0.712216
PAM95788.1	porphobilinogen	synthase [Flavobacterium sp. IR1]	0.00050277	1150.9	682.067	0.592637	-0.75478
PAM95789.1	hypothetical	protein B4N84_04380 [Flavobacterium sp. IR1]	0.0750012	287.765	70.656	0.245534	-2.02601
PAM95790.1	hypothetical	protein B4N84_04385 [Flavobacterium sp. IR1]	1.09e-07	65.8364	25.7833	0.391627	-1.35245	0.93	Yes (Signal peptide)	X
PAM95792.1	coproporphyrinogen	III oxidase [Flavobacterium sp. IR1]	0.409582	51.7737	40.4437	0.781164	-0.356302
PAM95796.1	uroporphyrinogen	decarboxylase [Flavobacterium sp. IR1]	9.69e-06	375.452	190.549	0.507519	-0.978466
PAM95801.1	ferrochelatase	[Flavobacterium sp. IR1]	0.0377173	74.8493	62.9854	0.841496	-0.248973
PAM95805.1	hypothetical	protein B4N84_04465 [Flavobacterium sp. IR1]	0.269609	44.2867	39.1124	0.883162	-0.17925
PAM95814.1;WP_026982321.1	hypothetical;MULTISPECIES:	protein B4N84_04515 [Flavobacterium sp. IR1];BrxA/BrxB family bacilliredoxin [Flavobacterium]	0.00126337	110.745	50.5151	0.456141	-1.13245	0.34	Other
PAM95818.1	hypothetical	protein B4N84_04535 [Flavobacterium sp. IR1]	0.547894	46.2413	37.3199	0.807069	-0.309235
PAM95819.1	hypothetical	protein B4N84_04540 [Flavobacterium sp. IR1]	0.0318926	134.415	46.1588	0.343406	-1.54201
PAM95821.1	hypothetical	protein B4N84_04550 [Flavobacterium sp. IR1]	0.773723	58.6884	62.2094	1.06	0.0840594
PAM95822.1	hypothetical	protein B4N84_04555 [Flavobacterium sp. IR1]	9.01e-05	12.4846	41.3419	3.31142	1.72745	0.1	Other
PAM95825.1	succinyl-CoA--3-ketoacid-CoA	transferase [Flavobacterium sp. IR1]	0.931079	362.298	377.036	1.04068	0.0575256
PAM95826.1	CoA	transferase subunit B [Flavobacterium sp. IR1]	0.311329	284.81	312.582	1.09751	0.134234
PAM95827.1	peptidase	M4 [Flavobacterium sp. IR1]	1.72e-09	81.644	289.357	3.54413	1.82543	0.95	Yes (Signal peptide)	Proteolysis
PAM95828.1	ferric	enterobactin receptor [Flavobacterium sp. IR1]	6.53e-11	790.396	1261.21	1.59567	0.674159
PAM95829.1	DNA-directed	RNA polymerase subunit delta [Flavobacterium sp. IR1]	0.821837	18.7229	18.3312	0.979078	-0.0305042
PAM95830.1	hypothetical	protein B4N84_04600 [Flavobacterium sp. IR1]	1.29e-05	139.722	350.978	2.51198	1.32883	0.74	Yes (Signal peptide)	X
PAM95831.1	serine/threonine	protein phosphatase [Flavobacterium sp. IR1]	8.3e-06	10.5837	30.4531	2.87737	1.52475	0.07	Other
PAM95834.1	fumarate	hydratase [Flavobacterium sp. IR1]	4.14e-09	367.65	941.874	2.56188	1.3572	0.22	Other
PAM95837.1	3'-5'	exonuclease [Flavobacterium sp. IR1]	0.974256	60.2316	48.6372	0.807503	-0.30846
PAM95839.1	NAD(P)-dependent	oxidoreductase [Flavobacterium sp. IR1]	0.0981451	7.97472	18.1573	2.27686	1.18704
PAM95840.1	GNAT	family N-acetyltransferase [Flavobacterium sp. IR1]	5.64e-05	64.6788	114.104	1.76417	0.81899
PAM95843.1	peptidase	M28 [Flavobacterium sp. IR1]	0.00942084	54.8154	38.2424	0.697657	-0.519411
PAM95849.1	ferritin	[Flavobacterium sp. IR1]	0.000395743	135.42	268.598	1.98344	0.988006
PAM95854.1	hypothetical	protein B4N84_04720 [Flavobacterium sp. IR1]	6.3e-05	410.234	319.204	0.778103	-0.361967
PAM95855.1	hypothetical	protein B4N84_04725 [Flavobacterium sp. IR1]	0.0273266	28.7477	15.6659	0.544943	-0.875822
PAM95856.1	flotillin	[Flavobacterium sp. IR1]	0.0269575	38.0425	27.4386	0.721262	-0.471405
PAM95858.1	methionine--tRNA	ligase [Flavobacterium sp. IR1]	2.11e-05	575.696	230.101	0.399691	-1.32304	0.07	Other
PAM95875.1	phenazine	biosynthesis protein PhzF [Flavobacterium sp. IR1]	0.0106806	35.1114	20.1098	0.572741	-0.804044
PAM95877.1	hypothetical	protein B4N84_04840 [Flavobacterium sp. IR1]	5.5e-08	457.533	1085.16	2.37177	1.24596	0.9	Yes (Signal peptide)	X
PAM95878.1	hypothetical	protein B4N84_04845 [Flavobacterium sp. IR1]	0.0017481	6.90064	16.6251	2.40921	1.26856	0.06	Yes (Signal peptide)	X
PAM95879.1	hypothetical	protein B4N84_04850 [Flavobacterium sp. IR1]	0.340251	28.2291	30.035	1.06397	0.0894583
PAM95881.1	serine--tRNA	ligase [Flavobacterium sp. IR1]	3.55e-08	82.996	30.7533	0.370539	-1.4323	0.06	Other
PAM95883.1	hypothetical	protein B4N84_04870 [Flavobacterium sp. IR1]	5.09e-09	111.863	24.5541	0.219502	-2.18769	0.22	Yes (Signal peptide)	LPS assembly
PAM95890.1	aspartate	racemase [Flavobacterium sp. IR1]	3.07e-11	33.6552	3.94049	0.117084	-3.09438	0.09	Other
PAM95891.1	hydroxyacid	dehydrogenase [Flavobacterium sp. IR1]	0.0126807	103.752	59.1146	0.569768	-0.811554
PAM95892.1	DUF4234	domain-containing protein [Flavobacterium sp. IR1]	0.169527	27.5028	24.7415	0.8996	-0.152644
PAM95894.1	hypothetical	protein B4N84_04925 [Flavobacterium sp. IR1]	0.0117459	17.8538	17.5542	0.983222	-0.0244116
PAM95895.1	glycerol	acyltransferase [Flavobacterium sp. IR1]	0.154588	99.2121	77.8178	0.784358	-0.350416
PAM95897.1	cell	envelope biogenesis protein OmpA [Flavobacterium sp. IR1]	0.0439833	1833.07	1913.96	1.04412	0.0622924
PAM95900.1	aldo/keto	reductase [Flavobacterium sp. IR1]	0.000173355	108.942	45.9312	0.421613	-1.24601	0.11	Other
PAM95901.1	hypothetical	protein B4N84_04960 [Flavobacterium sp. IR1]	0.0123431	197.225	204.629	1.03754	0.0531642
PAM95902.1	hypothetical	protein B4N84_04965 [Flavobacterium sp. IR1]	6.37e-05	14.0046	34.6137	2.4716	1.30544	0.95	Yes (Lipoprotein signal peptide)	X
PAM95906.1	DNA	repair protein RadA [Flavobacterium sp. IR1]	1.14e-06	11.4679	5.07691	0.442707	-1.17558	0.11	Other
PAM95907.1	histidine	kinase [Flavobacterium sp. IR1]	0.000223212	142.999	229.158	1.60251	0.680335
PAM95908.1;WP_026727479.1	aspartate;MULTISPECIES:	1-decarboxylase [Flavobacterium sp. IR1];aspartate 1-decarboxylase [Flavobacterium]	0.312168	40.6953	29.7975	0.732211	-0.449669
PAM95909.1	pantoate--beta-alanine	ligase [Flavobacterium sp. IR1]	0.146428	54.4996	53.7772	0.986744	-0.019252
PAM95911.1	hypothetical	protein B4N84_05010 [Flavobacterium sp. IR1]	0.00782697	1740.54	1483.12	0.852105	-0.230896
PAM95912.1	glutamine--fructose-6-phosphate	transaminase (isomerizing) [Flavobacterium sp. IR1]	0.000610238	305.459	207.549	0.679466	-0.557528
PAM95913.1	hypothetical	protein B4N84_05020 [Flavobacterium sp. IR1]	0.000420477	977.099	732.625	0.749797	-0.415428
PAM95914.1	G-D-S-L	family lipolytic protein [Flavobacterium sp. IR1]	7.53e-07	7940.67	3930.16	0.49494	-1.01467	0.93	Yes (Lipoprotein signal peptide)	Lipid metabolism
PAM95915.1	F0F1	ATP synthase subunit beta [Flavobacterium sp. IR1]	1.74e-05	65.1139	107.191	1.64621	0.719145
PAM95918.1	8-amino-7-oxononanoate	synthase [Flavobacterium sp. IR1]	0.000378282	19.7063	31.6043	1.60377	0.681466
PAM95919.1	TraB/GumN	family protein [Flavobacterium sp. IR1]	9.95e-06	66.8668	99.4456	1.48722	0.572617
PAM95923.1	adenosylmethionine--8-amino-7-oxononanoate	transaminase [Flavobacterium sp. IR1]	0.000167436	69.7666	34.3364	0.492161	-1.0228	0.29	Other
PAM95925.1	hypothetical	protein B4N84_05080 [Flavobacterium sp. IR1]	1.55e-07	2136.41	2948.5	1.38012	0.464795
PAM95927.1	hypothetical	protein B4N84_05090 [Flavobacterium sp. IR1]	7.62e-09	224.942	754.21	3.35291	1.74541	0.94	Yes (Signal peptide)	X
PAM95928.1	hypothetical	protein B4N84_05095 [Flavobacterium sp. IR1]	0.0921977	620.588	612.431	0.986856	-0.0190892
PAM95929.1	hypothetical	protein B4N84_05100 [Flavobacterium sp. IR1]	1.17e-05	116.085	221.814	1.91079	0.934167
PAM95933.1	propanediol	utilization protein [Flavobacterium sp. IR1]	1.1e-05	102.562	246.88	2.40714	1.26732	0.94	Yes (Signal peptide)	Stress response
PAM95936.1	hypothetical	protein B4N84_05145 [Flavobacterium sp. IR1]	0.509377	45.4262	47.3059	1.04138	0.0584943
PAM95938.1	propanediol	utilization protein [Flavobacterium sp. IR1]	0.0166821	2474.19	2593.2	1.0481	0.0677748
PAM95940.1	glycine--tRNA	ligase [Flavobacterium sp. IR1]	5e-07	48.7543	112.399	2.30541	1.20503	0.08	Other
PAM95944.1	response	regulator [Flavobacterium sp. IR1]	3.46e-07	61.6689	163.291	2.64787	1.40483	0.28	Other
PAM95954.1	thiamine-phosphate	kinase [Flavobacterium sp. IR1]	0.728876	28.1003	29.0701	1.03451	0.0489522
PAM95955.1	damage-inducible	protein DinB [Flavobacterium sp. IR1]	0.0187084	48.2352	35.6712	0.739525	-0.435329
PAM95962.1	SusC/RagA	family TonB-linked outer membrane protein [Flavobacterium sp. IR1]	0.0012744	2064.64	2846.39	1.37864	0.463246
PAM95963.1	RagB/SusD	family nutrient uptake outer membrane protein [Flavobacterium sp. IR1]	0.995943	57.3983	52.508	0.914802	-0.128469
PAM95965.1	alpha-glucosidase	[Flavobacterium sp. IR1]	0.992142	92.6704	82.3193	0.888302	-0.170878
PAM95966.1	beta-glucosidase	[Flavobacterium sp. IR1]	0.000133587	179.123	98.4362	0.549545	-0.863691
PAM95967.1	glycosyl	hydrolase [Flavobacterium sp. IR1]	0.0647129	186.42	181.788	0.975156	-0.0362951
PAM95968.1	hypothetical	protein B4N84_05325 [Flavobacterium sp. IR1]	0.000864672	95.7093	148.701	1.55367	0.635681
PAM95974.1	phenylalanine--tRNA	ligase subunit alpha [Flavobacterium sp. IR1]	0.401321	35.8097	26.5746	0.742105	-0.430305
PAM95978.1	glycerol-3-phosphate	dehydrogenase [Flavobacterium sp. IR1]	0.130111	30.3687	33.5848	1.1059	0.145225
PAM95979.1	hypothetical	protein B4N84_05380 [Flavobacterium sp. IR1]	0.707738	544.745	509.35	0.935025	-0.0969238
PAM95980.1	NADH-dependent	alcohol dehydrogenase [Flavobacterium sp. IR1]	0.0191523	37.8463	18.0602	0.477198	-1.06734
PAM95993.1	nicotinate	phosphoribosyltransferase [Flavobacterium sp. IR1]	0.0015987	41.3539	8.51936	0.206011	-2.27921	0.06	Other
PAM95997.1	YicC	family protein [Flavobacterium sp. IR1]	2.29e-06	118.322	43.3816	0.366642	-1.44756	0.08	Other
PAM95998.1	hypothetical	protein B4N84_05485 [Flavobacterium sp. IR1]	0.00533691	27.255	3.93003	0.144195	-2.79391	0.11	Other
PAM96001.1	TonB-dependent	receptor [Flavobacterium sp. IR1]	5.43e-10	5275.6	12059.1	2.28582	1.19271	0.95	Yes (Signal peptide)	Transport
PAM96002.1	glucose-6-phosphate	isomerase [Flavobacterium sp. IR1]	0.000990618	322.985	119.296	0.369356	-1.43692	0.65	Other	Carbohydrate metabolism/Amino sugar and nucleotide sugar metabolism
PAM96003.1	hypothetical	protein B4N84_05510 [Flavobacterium sp. IR1]	0.434965	248.925	219.701	0.882601	-0.180166
PAM96004.1	hypothetical	protein B4N84_05515 [Flavobacterium sp. IR1]	0.00116879	59.4116	12.6891	0.213579	-2.22716	0.28	Yes (Signal peptide)	X
PAM96005.1	peptidase	M23 [Flavobacterium sp. IR1]	0.0423744	9.40457	11.3497	1.20683	0.271221
PAM96007.1	ATP-dependent	exonuclease [Flavobacterium sp. IR1]	0.173251	17.6891	17.884	1.01102	0.0158079
PAM96008.1	4-hydroxyphenylpyruvate	dioxygenase [Flavobacterium sp. IR1]	3.65e-05	929.53	555.031	0.59711	-0.743931
PAM96009.1	homogentisate	1,2-dioxygenase [Flavobacterium sp. IR1]	1.74e-05	2464.43	342.729	0.139071	-2.84611	0.23	Other
PAM96019.1	hypothetical	protein B4N84_05595 [Flavobacterium sp. IR1]	0.891362	20.8907	29.4163	1.4081	0.493755
PAM96021.1	MoxR	family ATPase [Flavobacterium sp. IR1]	0.0272942	821.762	1036.32	1.2611	0.334682
PAM96022.1	aldo/keto	reductase [Flavobacterium sp. IR1]	4.54e-05	65.4397	18.1591	0.277493	-1.84947	0.07	Other
PAM96023.1	NAD(P)-dependent	oxidoreductase [Flavobacterium sp. IR1]	0.00653825	71.0969	49.2565	0.692808	-0.529472
PAM96025.1	hypothetical	protein B4N84_05625 [Flavobacterium sp. IR1]	0.648516	57.4087	57.6364	1.00397	0.00571101
PAM96026.1	cystathionine	gamma-synthase [Flavobacterium sp. IR1]	0.00147967	1280.74	909.233	0.709929	-0.494252
PAM96027.1	glutamate	dehydrogenase [Flavobacterium sp. IR1]	0.000186092	1279.67	2494.13	1.94904	0.962766
PAM96028.1	glutamate	dehydrogenase [Flavobacterium sp. IR1]	1.77e-06	5523.6	2833.01	0.512891	-0.963275
PAM96029.1	ABC	transporter substrate-binding protein [Flavobacterium sp. IR1]	0.044807	35.4752	18.91	0.533047	-0.907665
PAM96033.1	isoleucine--tRNA	ligase [Flavobacterium sp. IR1]	8.61e-05	282.932	127.309	0.449964	-1.15212	0.08	Other
PAM96035.1	hypothetical	protein B4N84_05675 [Flavobacterium sp. IR1]	0.000116612	8.34172	2.70791	0.324623	-1.62316	0.36	Other
PAM96036.1	dynein	regulation protein LC7 [Flavobacterium sp. IR1]	1.22e-05	61.3672	37.2497	0.606998	-0.720237
PAM96040.1	glycine	C-acetyltransferase [Flavobacterium sp. IR1]	0.0290569	3536.78	2741.44	0.775124	-0.3675
PAM96041.1	cell	envelope biogenesis protein OmpA [Flavobacterium sp. IR1]	0.00129918	123785	128555	1.03854	0.0545518
PAM96047.1	endothelin-converting	protein [Flavobacterium sp. IR1]	1.73e-05	501.604	667.436	1.3306	0.41208
PAM96048.1	hydroxymethylbilane	synthase [Flavobacterium sp. IR1]	0.905095	35.9457	31.6763	0.881226	-0.182416
PAM96050.1	penicillin-binding	protein [Flavobacterium sp. IR1]	3.45e-08	674.584	270.349	0.400764	-1.31918	0.78	Other	antibiotic resistancePeptidoglycan biosynthesis/Beta-lactam resistance
PAM96051.1	TetR	family transcriptional regulator [Flavobacterium sp. IR1]	4.24e-05	56.8485	90.9494	1.59985	0.677941
PAM96055.1	hypothetical	protein B4N84_05290 [Flavobacterium sp. IR1]	4.18e-10	499.582	80.5555	0.161246	-2.63267	0.94	Yes (Lipoprotein signal peptide)	X
PAM96056.1	hypothetical	protein B4N84_05315 [Flavobacterium sp. IR1]	0.00639959	107.163	125.515	1.17125	0.228055
PAM96058.1	type	1 glutamine amidotransferase domain-containing protein [Flavobacterium sp. IR1]	4.44e-07	218.518	449.618	2.05757	1.04094	0.93	Other
PAM96060.1	patatin	[Flavobacterium sp. IR1]	0.00108763	67.6689	55.5441	0.820822	-0.284858
PAM96168.1	X-Pro	aminopeptidase, partial [Flavobacterium sp. IR1]	0.0139741	1604.97	1290.79	0.804242	-0.314298
PAM96210.1	ABC	transporter ATP-binding protein [Flavobacterium sp. IR1]	0.0281426	131.986	100.053	0.758056	-0.399623
PAM96215.1	hydrolase	[Flavobacterium sp. IR1]	0.173036	44.1026	48.3471	1.09624	0.132568
PAM96224.1	NAD(P)H-dependent	oxidoreductase [Flavobacterium sp. IR1]	0.0448043	2494.63	2363.17	0.947305	-0.0780991
PAM96227.1	hypothetical	protein B4N84_02045 [Flavobacterium sp. IR1]	0.00160404	19.3247	14.3826	0.744259	-0.426123
PAM96228.1	antibiotic	biosynthesis monooxygenase [Flavobacterium sp. IR1]	0.411156	53.8637	56.8028	1.05457	0.0766508
PAM96236.1	hypothetical	protein B4N84_02100 [Flavobacterium sp. IR1]	1.05e-06	40.9916	65.5142	1.59823	0.676477
PAM96237.1	hypothetical	protein B4N84_02105 [Flavobacterium sp. IR1]	0.0688516	50.6408	49.8544	0.984471	-0.0225792
PAM96238.1	hypothetical	protein B4N84_02110 [Flavobacterium sp. IR1]	0.0114637	14.9767	21.0779	1.40738	0.493014
PAM96239.1	hypothetical	protein B4N84_02115 [Flavobacterium sp. IR1]	0.659007	18.7305	14.6131	0.780177	-0.358127
PAM96240.1	hypothetical	protein B4N84_02120 [Flavobacterium sp. IR1]	0.0406896	21.8654	25.3369	1.15877	0.212588
PAM96241.1	hypothetical	protein B4N84_02125 [Flavobacterium sp. IR1]	5.48e-05	40.055	132.288	3.30266	1.72363	0.85	Yes (Signal peptide)	X
PAM96242.1	hypothetical	protein B4N84_02130 [Flavobacterium sp. IR1]	7.91e-07	11.5756	27.7248	2.39511	1.26009	0.16	Other
PAM96243.1	hypothetical	protein B4N84_02135 [Flavobacterium sp. IR1]	0.918358	36.3791	30.6113	0.841454	-0.249043
PAM96244.1	hypothetical	protein B4N84_02140 [Flavobacterium sp. IR1]	7.17e-05	176.378	538.098	3.05083	1.6092	0.14	Yes (Signal peptide)	X
PAM96264.1	RND	transporter [Flavobacterium sp. IR1]	7.32e-06	30.2328	55.9519	1.8507	0.888073
PAM96268.1	oar	protein [Flavobacterium sp. IR1]	0.000260434	136.837	155.484	1.13628	0.184313
PAM96270.1	thioesterase	[Flavobacterium sp. IR1]	4.24e-06	184.274	271.392	1.47276	0.558526
PAM96281.1	hypothetical	protein B4N84_02340 [Flavobacterium sp. IR1]	0.160872	1613.96	1457.12	0.90282	-0.147489
PAM96282.1	hypothetical	protein B4N84_02345 [Flavobacterium sp. IR1]	0.00036418	40.3505	58.6611	1.45379	0.539819
PAM96288.1	alpha-mannosidase	[Flavobacterium sp. IR1]	0.0661147	204.657	215.017	1.05062	0.0712434
PAM96292.1	tungsten	formylmethanofuran dehydrogenase [Flavobacterium sp. IR1]	0.0646593	34.7912	32.0213	0.920386	-0.119689
PAM96295.1	glycosyl	hydrolase family 32 [Flavobacterium sp. IR1]	0.0210734	105.472	102.39	0.970774	-0.0427932
PAM96296.1	SusC/RagA	family protein [Flavobacterium sp. IR1]	9.04e-05	29.248	77.5869	2.65273	1.40748	0.93	Yes (Signal peptide)	Carbohydrate metabolism
PAM96297.1	RagB/SusD	family nutrient uptake outer membrane protein [Flavobacterium sp. IR1]	9.93e-05	27.3821	50.0155	1.82657	0.86914
PAM96302.1	hypothetical	protein B4N84_02445 [Flavobacterium sp. IR1]	0.00411713	75.2631	52.0234	0.691221	-0.532782
PAM96306.1	oxidoreductase	[Flavobacterium sp. IR1]	0.0308596	41.4374	112.259	2.70913	1.43783
PAM96307.1	hypothetical	protein B4N84_02470 [Flavobacterium sp. IR1]	4.03e-05	233.335	288.582	1.23677	0.306577
PAM96310.1	hypothetical	protein B4N84_02485 [Flavobacterium sp. IR1]	0.000470966	267.483	369.034	1.37966	0.464308
PAM96328.1	catalase/peroxidase	HPI [Flavobacterium sp. IR1]	0.00155042	607.195	453.899	0.747534	-0.419789
PAM96331.1	peptidase	M13 [Flavobacterium sp. IR1]	0.000161927	243.153	133.708	0.549893	-0.862777
PAM96348.1	hydrolase	[Flavobacterium sp. IR1]	9.07e-08	159.892	378.118	2.36483	1.24174	0.1	Yes (Signal peptide)	X
PAM96364.1	hypothetical	protein B4N84_02770 [Flavobacterium sp. IR1]	1.44e-05	83.877	101.202	1.20655	0.270885
PAM96367.1	transporter	[Flavobacterium sp. IR1]	3.46e-07	15.9168	25.1543	1.58036	0.660251
PAM96371.1	hypothetical	protein B4N84_02805 [Flavobacterium sp. IR1]	0.165384	44.4296	44.912	1.01086	0.0155818
PAM96372.1	MBL	fold metallo-hydrolase [Flavobacterium sp. IR1]	0.000624272	32.1235	48.1528	1.49899	0.583991
PAM96375.1	hypothetical	protein B4N84_02830 [Flavobacterium sp. IR1]	0.30366	7.8543	7.61833	0.969957	-0.0440077
PAM96384.1	DEAD/DEAH	box helicase [Flavobacterium sp. IR1]	0.000182608	55.5052	27.5261	0.49592	-1.01182	0.1	Other
PAM96386.1	adenine	phosphoribosyltransferase [Flavobacterium sp. IR1]	1.36e-06	146.299	571.055	3.90335	1.96471	0.05	Other
PAM96388.1	phenylalanine--tRNA	ligase subunit beta [Flavobacterium sp. IR1]	0.0606406	116.303	126.555	1.08815	0.121883
PAM96389.1	aldehyde	dehydrogenase [Flavobacterium sp. IR1]	0.251223	10358.6	9274.26	0.895324	-0.159519
PAM96392.1	transporter	[Flavobacterium sp. IR1]	0.000159963	25.6746	41.0996	1.60079	0.678783
PAM96394.1	efflux	transporter periplasmic adaptor subunit [Flavobacterium sp. IR1]	0.376239	15.2957	8.84716	0.578407	-0.789843
PAM96397.1	hypothetical	protein B4N84_02960 [Flavobacterium sp. IR1]	0.880517	158.046	95.2525	0.602689	-0.730513
PAM96400.1	aminopeptidase	[Flavobacterium sp. IR1]	0.19809	152.351	134.503	0.882852	-0.179756
PAM96405.1	hypothetical	protein B4N84_03010 [Flavobacterium sp. IR1]	1.97e-05	6478.21	9993.24	1.54259	0.625357
PAM96414.1	hypothetical	protein B4N84_03055 [Flavobacterium sp. IR1]	0.912596	19.0541	15.9987	0.839643	-0.252152
PAM96418.1	two-component	system response regulator [Flavobacterium sp. IR1]	0.0305362	63.0688	45.1761	0.7163	-0.481365
PAM96419.1	phosphohydrolase	[Flavobacterium sp. IR1]	0.000109999	43.8972	29.6653	0.67579	-0.565354
PAM96420.1	UDP-3-O-(3-hydroxymyristoyl)glucosamine	N-acyltransferase [Flavobacterium sp. IR1]	8.91e-05	21.1385	13.0429	0.617023	-0.696603
PAM96424.1	hypothetical	protein B4N84_03110 [Flavobacterium sp. IR1]	0.118225	315.625	249.613	0.790853	-0.338519
PAM96425.1;WP_089050750.1	succinate--CoA;MULTISPECIES:	ligase subunit alpha [Flavobacterium sp. IR1];succinate--CoA ligase subunit alpha [Flavobacterium]	0.00902044	278.331	234.66	0.843098	-0.246227
PAM96426.1	hypothetical	protein B4N84_03120 [Flavobacterium sp. IR1]	9.41e-06	261.262	173.048	0.662355	-0.594323
PAM96433.1	hypothetical	protein B4N84_03155 [Flavobacterium sp. IR1]	0.0102281	164.337	178.562	1.08656	0.119769
PAM96434.1	S1/P1	Nuclease [Flavobacterium sp. IR1]	1.48e-08	136.665	13.4676	0.0985444	-3.34308	0.34	Other
PAM96443.1	peptidase	M1 [Flavobacterium sp. IR1]	8.04e-06	136.598	191.83	1.40434	0.489891
PAM96445.1	2-isopropylmalate	synthase [Flavobacterium sp. IR1]	0.000161653	10.4069	39.611	3.80622	1.92836	0.07	Other
PAM96446.1	3-isopropylmalate	dehydrogenase [Flavobacterium sp. IR1]	7.51e-07	20.7031	96.7772	4.67452	2.22482	0.04	Other
PAM96447.1	dihydroxy-acid	dehydratase [Flavobacterium sp. IR1]	0.332447	66.5372	70.4911	1.05942	0.0832803
PAM96450.1	ketol-acid	reductoisomerase [Flavobacterium sp. IR1]	0.0365932	23.0072	24.7735	1.07677	0.106708
PAM96451.1	acetate--CoA	ligase [Flavobacterium sp. IR1]	1.55e-05	30.0598	50.204	1.67013	0.739964
PAM96452.1	DNA	polymerase III subunit epsilon [Flavobacterium sp. IR1]	0.290527	4.63262	5.4122	1.16828	0.224386
PAM96453.1	nucleotidyltransferase	[Flavobacterium sp. IR1]	0.78856	138.506	106.061	0.765749	-0.385057
PAM96454.1	hypothetical	protein B4N84_03265 [Flavobacterium sp. IR1]	0.0140089	798.861	645.147	0.807582	-0.308319
PAM96455.1	hypothetical	protein B4N84_03270 [Flavobacterium sp. IR1]	4.64e-05	2086.31	2158.84	1.03477	0.0493047
PAM96457.1	FAD-dependent	oxidoreductase [Flavobacterium sp. IR1]	0.0124313	20.9641	36.6539	1.74841	0.806043
PAM96458.1	DEAD/DEAH	box helicase [Flavobacterium sp. IR1]	0.0890632	27.7183	29.8603	1.07728	0.107389
PAM96467.1	dehydrogenase	[Flavobacterium sp. IR1]	0.490169	78.6491	80.0508	1.01782	0.0254845
PAM96469.1	flavonol	synthase [Flavobacterium sp. IR1]	0.0531681	745.184	851.269	1.14236	0.192019
PAM96471.1	phosphorylase	[Flavobacterium sp. IR1]	2.66e-09	444.993	652.16	1.46555	0.551441
PAM96472.1	prolyl	endopeptidase [Flavobacterium sp. IR1]	0.144668	20.6899	23.2379	1.12315	0.167553
PAM96474.1	ABC	transporter substrate-binding protein [Flavobacterium sp. IR1]	0.00695913	253.084	682.689	2.69748	1.43161	0.06	Other
PAM96483.1	hypothetical	protein B4N84_03410 [Flavobacterium sp. IR1]	0.000119085	100.048	115.972	1.15916	0.213083
PAM96484.1	hypothetical	protein B4N84_03415 [Flavobacterium sp. IR1]	0.228116	39.2129	36.7021	0.93597	-0.0954655
PAM96485.1	hypothetical	protein B4N84_03420 [Flavobacterium sp. IR1]	0.253819	38.6664	44.9099	1.16147	0.215953
PAM96486.1	hypothetical	protein B4N84_03425 [Flavobacterium sp. IR1]	0.866239	30.0171	25.9833	0.865616	-0.208201
PAM96488.1	hypothetical	protein B4N84_03435 [Flavobacterium sp. IR1]	0.000471847	77.0144	48.5791	0.630779	-0.664794
PAM96490.1	class	A beta-lactamase [Flavobacterium sp. IR1]	0.356925	53.1532	53.9638	1.01525	0.0218346
PAM96491.1	serine	hydrolase [Flavobacterium sp. IR1]	2.52e-05	30.5825	5.80643	0.189861	-2.39698	0.11	Yes (Signal peptide)	Antibiotic resistance
PAM96492.1	hypothetical	protein B4N84_03455 [Flavobacterium sp. IR1]	0.00857722	20.4251	49.9687	2.44644	1.29068	0.08	Yes (Lipoprotein signal peptide)	X
PAM96493.1	pyrrolo-quinoline	quinone [Flavobacterium sp. IR1]	2.21e-06	254.191	120.06	0.472323	-1.08215	0.48	Yes (Signal peptide)	Stress response
PAM96498.1	short-chain	dehydrogenase [Flavobacterium sp. IR1]	0.242302	6.7984	9.74934	1.43406	0.520109
PAM96502.1	alpha/beta	hydrolase [Flavobacterium sp. IR1]	5.09e-05	111.447	236.894	2.12561	1.08788	0.34	Yes (Signal peptide)	Lipid metabolism
PAM96506.1	ketosteroid	isomerase [Flavobacterium sp. IR1]	8.81e-05	29.599	55.3606	1.87035	0.903311
PAM96511.1	hypothetical	protein B4N84_02990 [Flavobacterium sp. IR1]	0.0068011	49.8842	27.2683	0.546633	-0.871356
PAM96512.1	ATP-dependent	DNA helicase [Flavobacterium sp. IR1]	0.0379113	13474.1	12850.2	0.95369	-0.0684081
PAM96513.1	UDP-3-O-[3-hydroxymyristoyl]	N-acetylglucosamine deacetylase [Flavobacterium sp. IR1]	0.902956	78.979	89.0299	1.12726	0.172821
PAM96518.1	hypothetical	protein B4N84_01915, partial [Flavobacterium sp. IR1]	0.000384345	5.36331	7.74095	1.44332	0.529388
PAM96568.1	translational	GTPase TypA [Flavobacterium sp. IR1]	0.0353919	10.0903	20.654	2.04692	1.03345
PAM96569.1	hypothetical	protein B4N84_00985 [Flavobacterium sp. IR1]	7.84e-06	2277.66	3219.66	1.41358	0.499356
PAM96571.1	ABC	transporter ATP-binding protein [Flavobacterium sp. IR1]	0.09625	85.2786	59.1264	0.693332	-0.528381
PAM96573.1	hypothetical	protein B4N84_01005 [Flavobacterium sp. IR1]	0.291169	69.6693	45.2952	0.650147	-0.621163
PAM96574.1	metallophosphoesterase	[Flavobacterium sp. IR1]	0.000139513	150.814	171.723	1.13864	0.187312
PAM96579.1	hypothetical	protein B4N84_01035 [Flavobacterium sp. IR1]	0.0301034	76.8039	81.5187	1.06139	0.0859526
PAM96583.1	maltose	acetyltransferase [Flavobacterium sp. IR1]	7.01e-06	609.337	288.249	0.473054	-1.07992	0.25	Yes (Signal peptide)	Carbohydrate metabolism
PAM96589.1	hypothetical	protein B4N84_01090 [Flavobacterium sp. IR1]	1.55e-05	145.745	180.159	1.23613	0.305826
PAM96593.1	hypothetical	protein B4N84_01115 [Flavobacterium sp. IR1]	0.00137675	15.9222	17.5311	1.10105	0.138876
PAM96600.1	transporter	[Flavobacterium sp. IR1]	2.36e-07	513.441	1032.02	2.01001	1.0072	0.8	Yes (Signal peptide)	Transport
PAM96601.1	TetR	family transcriptional regulator [Flavobacterium sp. IR1]	0.00373298	90.8003	181.711	2.00121	1.00088	0.12	Other
PAM96613.1	anthranilate	synthase component I [Flavobacterium sp. IR1]	0.000753687	26.3702	15.1485	0.574457	-0.799729
PAM96615.1	lipid-binding	protein [Flavobacterium sp. IR1]	0.987338	628.424	510.828	0.812871	-0.298901
PAM96628.1	hypothetical	protein B4N84_01310 [Flavobacterium sp. IR1]	0.0100023	19.5154	28.0023	1.43488	0.520931
PAM96631.1	hypothetical	protein B4N84_01325 [Flavobacterium sp. IR1]	0.0173714	4.48561	11.3825	2.53756	1.34344
PAM96635.1	hypothetical	protein B4N84_01345 [Flavobacterium sp. IR1]	0.000488142	8465.04	9134.65	1.0791	0.109833
PAM96639.1	NADP-dependent	glyceraldehyde-3-phosphate dehydrogenase [Flavobacterium sp. IR1]	5.6e-07	112.062	258.214	2.3042	1.20426	0.19	Other
PAM96640.1	aminopeptidase	[Flavobacterium sp. IR1]	0.182981	5.51825	12.3704	2.24172	1.16461
PAM96649.1	hypothetical	protein B4N84_01415 [Flavobacterium sp. IR1]	3.28e-09	51.7354	275.137	5.31817	2.41093	0.69	Yes (Signal peptide)	Transport
PAM96651.1	hypothetical	protein B4N84_01425 [Flavobacterium sp. IR1]	0.00717726	7.67198	11.7715	1.53435	0.61763
PAM96654.1	hydrophobe/amphiphile	efflux-1 family RND transporter [Flavobacterium sp. IR1]	0.00625956	366.522	981.469	2.67779	1.42104	0.17	Other
PAM96665.1	ribonucleoside-diphosphate	reductase subunit alpha [Flavobacterium sp. IR1]	0.000257531	61.8442	64.3688	1.04082	0.0577239
PAM96670.1	SusC/RagA	family TonB-linked outer membrane protein [Flavobacterium sp. IR1]	0.00086245	1871.65	1465.44	0.782966	-0.352979
PAM96671.1	sugar	hydrolase [Flavobacterium sp. IR1]	0.00123288	89.891	132.416	1.47307	0.558831
PAM96672.1	alpha-mannosidase	[Flavobacterium sp. IR1]	0.735227	116.659	103.535	0.887504	-0.172175
PAM96676.1	transporter	[Flavobacterium sp. IR1]	3.43e-06	42.1319	57.1847	1.35728	0.440714
PAM96682.1	hypothetical	protein B4N84_01615 [Flavobacterium sp. IR1]	0.000160241	80.6623	19.6477	0.243579	-2.03754	0.05	Yes (Signal peptide)	X
PAM96684.1	hypothetical	protein B4N84_01625 [Flavobacterium sp. IR1]	0.0122732	25.2759	46.3066	1.83205	0.873457
PAM96687.1	gamma-glutamylcyclotransferase	[Flavobacterium sp. IR1]	0.000445366	73.9801	41.0322	0.554639	-0.85038
PAM96690.1	hypothetical	protein B4N84_01465 [Flavobacterium sp. IR1]	0.00927282	532.148	625.292	1.17503	0.232703
PAM96692.1	alpha/beta	hydrolase [Flavobacterium sp. IR1]	0.413004	52.9633	39.3053	0.742123	-0.43027
PAM96695.1	SusD/RagB	family nutrient-binding outer membrane lipoprotein [Flavobacterium sp. IR1]	7.8e-09	992.452	622.556	0.627291	-0.672794
